1 **TITLE: RTP801 IS A KEY MODULATOR FOR MOTOR LEARNING**

2

3 Abbreviated title: **RTP801 in motor learning**

4

5 **AUTHORS:** Pérez-Sisqués L<sup>1,2#</sup>, Martín-Flores N<sup>1,2#a</sup>, Masana M<sup>1,2,3,4</sup>, Solana J<sup>1,2</sup>, Llobet A<sup>1</sup>,  
6 Romani-Aumedes J<sup>1,2</sup>, Canal M<sup>1,2§</sup>, Campoy G<sup>1,2</sup>, García-García E.<sup>1,2,3,4</sup>, Sánchez-  
7 Fernández N<sup>1</sup>, Fernández-García S<sup>1,2,3,4</sup>, Gilbert JP<sup>5</sup>, Rodríguez MJ<sup>1,2,3,4</sup>, Man H-Y<sup>5</sup>,  
8 Feinstein E<sup>6</sup>, Williamson D<sup>7</sup>, Soto D<sup>1,2,3</sup>, Gasull X<sup>1,2,3</sup>, Alberch J<sup>1,2,3,4</sup> and Malagelada C<sup>1,2\*</sup>

9

10 <sup>1</sup> Department of Biomedicine, Faculty of Medicine, University of Barcelona, Catalonia, Spain  
11 <sup>2</sup> Institut de Neurociències, University of Barcelona, 08036 Catalonia, Spain  
12 <sup>3</sup> IDIBAPS- Institut d'Investigacions Biomèdiques August Pi i Sunyer, Barcelona, 08036  
13 Catalonia, Spain  
14 <sup>4</sup> Centro de Investigación Biomédica en Red sobre Enfermedades Neurodegenerativas  
15 (CIBERNED), Barcelona, 08036 Catalonia, Spain  
16 <sup>5</sup> Department of Biology, Pharmacology and Experimental Therapeutics, Boston University,  
17 Boston, MA, 02215USA  
18 <sup>6</sup> Quark Pharmaceuticals, Fremont, CA, 94555 USA  
19 <sup>7</sup> Kinesiology Program, School of Behavioral Sciences and Education, Penn State  
20 Harrisburg, Middletown, PA, 17057 USA  
21 <sup>a</sup> Current affiliation: Department of Cell and Developmental Biology, University College  
22 London, London, WC1E 6BT, UK  
23 <sup>§</sup> Current affiliation: HIPRA Headquarters, Amer (Girona) 17170, Catalonia, Spain  
24 <sup>#</sup> These authors contributed equally to this work.

25

26 **\*Correspondence:** Cristina Malagelada, PhD. Unit of Biochemistry, Department de  
27 Biomedicine, Faculty of Medicine. Address: Casanova 143, north wing 3rd floor; Universitat  
28 de Barcelona, Barcelona 08036 Catalonia, (Spain) +34-934021919  
29 E-mail: [cristina.malagelada@ub.edu](mailto:cristina.malagelada@ub.edu)  
30 ORCID: 0000-0001-7185-436X

31

32

33 **KEY WORDS:** GluA1 / motor learning / mTOR / Plasticity / RTP801 /

34

35

36

37

38

39 **ABSTRACT:**

40

41 RTP801/REDD1 is a stress-regulated protein whose upregulation is necessary and sufficient  
42 to trigger neuronal death in *in vitro* and *in vivo* models of Parkinson's and Huntington's  
43 diseases and is up regulated in compromised neurons in human postmortem brains of both  
44 neurodegenerative disorders. Indeed, in both Parkinson's and Huntington's disease mouse  
45 models, RTP801 knockdown alleviates motor-learning deficits.

46 Here, we investigated the physiological role of RTP801 in neuronal plasticity. RTP801 is  
47 found in rat, mouse and human synapses. The absence of RTP801 enhanced excitatory  
48 synaptic transmission in both neuronal cultures and brain slices from RTP801 knock-out  
49 (KO) mice. Indeed, RTP801 KO mice showed improved motor learning, which correlated  
50 with lower spine density but increased basal filopodia and mushroom spines in the motor  
51 cortex layer V. This paralleled with higher levels of synaptosomal GluA1 and TrkB receptors  
52 in homogenates derived from KO mice motor cortex, proteins that are associated with  
53 synaptic strengthening. Altogether, these results indicate that RTP801 has an important role  
54 modulating neuronal plasticity in motor learning.

55

56

57 **INTRODUCTION:**

58

59 Synaptic plasticity is the ability to fine tune neuronal connectivity and dynamics upon  
60 demand, for example in situations in which individuals have to adjust movements in  
61 challenging environments. This process is known as motor learning and involves the  
62 acquisition of a novel motor skill that, once learned, persists after training period ends  
63 (Peters *et al*, 2017; Sanes & Donoghue, 2000; Xu *et al*, 2009).

64

65 The central hub for motor learning is the motor cortex, an interconnected structure with other  
66 brain regions such as the striatum, the thalamus, brainstem or the spinal cord (reviewed in

67 (Shepherd, 2013; Shepherd & Huganir, 2007)). The complex process of acquiring new motor  
68 skills induces synaptic plasticity in the motor cortex and requires dendritic spine formation,  
69 consolidation and/or elimination, all leading to a necessary synaptic remodeling and  
70 strengthening (Peters *et al*, 2017; Sanes & Donoghue, 2000; Fu *et al*, 2012; Xu *et al*, 2009).  
71 Pyramidal neurons from the motor cortex and striatal medium spiny neurons (MSNs)  
72 predominantly undergo plastic changes along motor learning (Costa *et al*, 2004; Tjia *et al*,  
73 2017). Regarding the motor cortex, projection pyramidal neurons from Layer V (LV) are the  
74 main excitatory input to the striatum involved in the corticostriatal pathway (Costa *et al*,  
75 2004; Shepherd & Huganir, 2007; Hintiryan *et al*, 2016; Anderson *et al*, 2010). These plastic  
76 changes leading to motor learning involve, at least, increased levels of  $\alpha$ -amino-3-hydroxy-5-  
77 methyl-4-isoxazolepropionic acid receptors (AMPA) at dendritic spines (Kida *et al*, 2016;  
78 Roth *et al*, 2020) . However, the mechanisms by which these events are regulated are not  
79 yet clearly elucidated.

80

81 In many neurodegenerative diseases, along with neurological and psychiatric symptoms,  
82 motor dysfunction is a hallmark of disease progression. Among these disorders, we find  
83 Parkinson's disease (PD), Huntington's disease (HD), or amyotrophic lateral sclerosis,  
84 (Shepherd, 2013). Motor dysfunction is due, in part, to an impairment in the synaptic  
85 plasticity of the circuitries that control movement by interconnecting motor cortex and basal  
86 ganglia and the thalamus, and also the cerebellum (Guo *et al*, 2015; Xu *et al*, 2017;  
87 Calabresi *et al*, 2007, 2000).

88

89 RTP801/REDD1, coded by the *DDIT4* gene, is a stress-regulated protein that is sufficient  
90 and necessary to induce neuron death (Shoshani *et al*, 2002; Malagelada *et al*, 2006). It is  
91 elevated in cellular and animal models of PD in response to dopaminergic neurotoxins  
92 (Malagelada *et al*, 2006; Ryu *et al*, 2005) and is highly up regulated in neuromelanin positive  
93 neurons in the substantia nigra pars compacta (SNpc) of both sporadic (Malagelada *et al*,  
94 2006) and parkin mutant PD patients (Romani-Aumedes *et al*, 2014). RTP801 induces

95 neuron death by a sequential inactivation of mTOR and the survival kinase Akt (Malagelada  
96 *et al*, 2008) via the tuberous sclerosis complex 1/2 (TSC1/2). Regarding HD, RTP801 levels  
97 are highly increased in HD human brains, in differentiated neurons derived from induced  
98 pluripotent stem cells (iPSC) from HD patients (Martín-Flores *et al*, 2016) and in striatal  
99 synapses from HD mouse models (Martín-Flores *et al*, 2020). Besides, in neuronal models  
100 of the disease, RTP801 mediates mutant huntingtin (mhtt)-induced toxicity (Martín-Flores *et*  
101 *al*, 2015). Importantly, RTP801 contributes to motor-learning dysfunction in HD since  
102 RTP801 knockdown prevents from the appearance of motor learning deficits in the R6/1  
103 model of the disease (Martín-Flores *et al*, 2020). This suggests that synaptic RTP801  
104 deregulation is a common hallmark in neurodegeneration. Indeed, RTP801 coding gene  
105 *DDIT4* was recently described as one of the top three common deregulated transcripts in  
106 *postmortem* brain samples from PD and HD patients (Labadorf *et al*, 2018). Furthermore,  
107 RTP801 is sufficient to cause neuronal atrophy and depressive-like behavior (Ota *et al*,  
108 2014) and it has a regulatory role in cortical development, neuronal differentiation  
109 (Malagelada *et al*, 2011) and peripheral nervous system myelination (Noseda *et al*, 2013).  
110 However, its physiological role in synaptic plasticity has not been resolved yet. For this  
111 reason, here we investigated the potential synaptic function of RTP801 in the corticostriatal  
112 pathway. By using cellular and murine models and *postmortem* human brains and  
113 performing behavioral, histological, electrophysiological and biochemical analysis, our  
114 results describe the implication of RTP801 in motor learning plasticity.

115

116

## 117 **RESULTS:**

118

### 119 **RTP801 is localized in the synapses of murine and human samples and modulates** 120 **synaptic transmission *in vitro***

121 We first explored whether RTP801 was localized in synapses and whether it was involved in  
122 synaptic function, connectivity and transmission. Hence, we first isolated cortical and striatal



123 crude synaptosomes from adult *postmortem* human brain, adult rat and mouse brains and  
124 from cultured rat cortical neurons. In all samples we observed the presence of RTP801 or its  
125 enrichment in crude isolated synaptic terminals in comparison to the initial homogenates  
126 (**Fig 1 A**), corroborating our own previous results (Martín-Flores *et al*, 2020). Interestingly, in  
127 cultured cortical neurons, we observed that RTP801 was expressed in the soma, dendrites  
128 and dendritic spines (**Fig 1 B**).

129 We next investigated whether RTP801 depletion affected spine density and synaptic  
130 transmission. For this, we knocked down the expression of RTP801 in cortical primary  
131 cultures at 14DIV, using lentivirus expressing a specific shRNA for RTP801 or scramble  
132 shRNA as control. We observed that RTP801 silencing induced a significant decrease in  
133 spine density relative to the scramble shRNA transduced neurons (**Fig 1 C**). We next  
134 analyzed whether RTP801 expression abrogation affected synapse function by evaluating  
135 the frequency and the amplitude of mEPSCs of cortical cultures derived from WT and  
136 RTP801 KO mice. Interestingly, in the complete absence of RTP801 expression using  
137 cultured cortical neurons from RTP801 KO mice, we observed that both the amplitude (**Fig 1**  
138 **D1, D2 & D.3**) and frequency (**Fig 1 D1. D2 & D.4**) of mEPSCs were higher than the ones  
139 registered in WT cortical sister cultures.

140 We corroborated our *in vitro* results using cultured hippocampal neurons, a well  
141 characterized plasticity model. In line with previous results, we found that RTP801  
142 colocalized with PSD-95, an excitatory postsynaptic scaffold protein, but not with the  
143 presynaptic marker SV2A, indicating that RTP801 is localized in the postsynaptic  
144 compartment (**Fig EV1 A-B**). Moreover, ectopic RTP801 expression attenuated the  
145 amplitude of mEPSCs without affecting the frequency, along with a decrease of PSD-95 and  
146 AMPAR receptor subunit GluA1 puncta intensity (**Fig EV1 C-E**).

147

### 148 **Synaptic and behavioral characterization of RTP801 KO mice brains**

149 Previous data pointed out that the total abrogation of RTP801 expression did not influence  
150 significantly either the brain structure or the basal behavior of the RTP801 KO mice in

151 comparison to WT animals (Brafman *et al*, 2004; Ota *et al*, 2014). However, we previously  
152 demonstrated that RTP801 regulated the timing of cortical neurogenesis and neuron  
153 differentiation/migration (Malagelada *et al*, 2011) using *in utero* electroporation techniques.  
154 For this reason, to validate the use of the RTP801 KO mouse to study its putative synaptic  
155 role, we characterized its brain morphology in comparison to WT animals. We first confirmed  
156 the lack of RTP801 expression in the KO animals in motor cortex homogenates (**Fig 2 A**).  
157 Macroscopically, although there were no differences in the mice body weight between  
158 genotypes (**Fig 2 B**), we observed that KO animals presented a decreased brain weight (**Fig**  
159 **2 C**). However, internal structural organization did not present major alterations either in  
160 cortical layers, hippocampus or even in the striatum, as judged by Nissl staining (**Fig 2 D**).  
161 Primary motor cortex (M1) layer thickness did not differ either between genotypes (**Fig 2 E**)  
162 but RTP801 KO mice showed an expected decreased cell density in the M1 LV (**Fig 2 F**).

163

164 We next investigated whether cortical spine density was affected in the adult brain of  
165 RTP801 KO mice using Golgi-Cox staining. Analyses were performed in the M1 layer V  
166 pyramidal neurons, the main excitatory and direct projection to the ipsi- and contralateral  
167 striatum in the corticostriatal pathway (Shepherd, 2013; Hintiryan *et al*, 2016; Anderson *et al*,  
168 2010; Xu *et al*, 2009). As previously seen by knocking down RTP801 in cortical cultured  
169 neurons (see **Fig 1 C**), we observed a reduction in the density of spines in LV neurons in  
170 naive RTP801 KO mice compared to WT animals (**Fig 2 G**).

171

172 Next, we assessed whether RTP801 modulate synaptic transmission in cortical brain slices  
173 from naïve WT and KO animals. We thus measured neuronal spike rate and bursting in M1  
174 LV using multielectrode array (MEA) (**Fig 2 H**). We found an increased spike rate in the LV  
175 of KO animals when compared with WT (**Fig 2 I.1**), with no differences between male and  
176 female animals (**Fig EV2 A**). Analysis of spike-train patterns showed a higher burst rate and  
177 proportion of spikes included in bursts in KO primary motor cortex slices when compared  
178 with WT (**Figure 2 I.2-I.3**). We found no other differences in the burst parameters analyzed

179 (Fig EV2 B-D). These results support the hypothesis that neuronal excitability is increased in  
180 LV motor cortex in KO mice as an attempt to compensate the decreased number of synaptic  
181 spines.

182

183 To study whether synaptic structural and functional changes in RTP801 KO mice correlated  
184 with behavioral alterations, we next investigated whether the lack of RTP801 affected  
185 coordination, locomotion and motor learning. We first tested WT and KO mice for hindlimb  
186 claspings, a marker of disease progression in a number of mouse models of  
187 neurodegeneration, including HD (Mangiarini *et al*, 1996; Chou *et al*, 2008). We observed  
188 that RTP801 KO male mice displayed a claspings phenotype, not present in male WT mice.  
189 The tendency in females was similar but not significant (Fig EV3 A). We next explored  
190 whether gait, as a measure of coordination and muscle function, was affected in RTP801 KO  
191 mice. These animals showed a decrease in the length of the stride, stance, sway and the  
192 overlap (Fig 3 A-B and Fig EV3 B), suggesting gait impairment in the KO animals. We next  
193 examined whether general locomotor activity was altered using the Open Field test. Despite  
194 gait impairment, we did not find any differences in the total distance travelled in the RTP801  
195 KO mice relative to WT (Fig 3 C). We did not find differences in the distance travelled in the  
196 center or the time spent in the center, suggesting that RTP801 KO mice do not exhibit  
197 anxiety-like behavior. Regarding other general exploratory and stereotypic behavior, we did  
198 not find any differences in grooming or wall and vertical rearing, either (Fig EV3 C).

199 To evaluate motor skill learning, we trained the WT and RTP801 KO animals in the  
200 accelerating rotarod. Both female and male KO mice showed the same trend to improve  
201 motor learning in this behavioral paradigm ( Fig EV3 D). Together, RTP801 KO mice  
202 significantly improved performance in this task compared to WT animals (Genotype effect, \*\*  
203  $P=0.0058$ ) (Fig 3 D). This result indicates that RTP801 is involved in motor learning  
204 acquisition.

205

206 **RTP801 modulates spine density and structure in the primary motor cortex of trained**  
207 **animals**

208 We next investigated whether the improvement in motor learning in the RTP801 KO mice  
209 affected differentially spine density and structure. Hence, since motor learning plasticity  
210 involves projections from the motor cortex to the dorsal striatum, we explored spine density  
211 and morphology in pyramidal neurons from the M1 LV and in medium spiny neurons (MSNs)  
212 from the dorsal striatum, one week after finishing the accelerating rotarod test (**Fig 4 A**).  
213 Similar to non-trained naïve RTP801 KO mice, trained RTP801 KO mice showed a decrease  
214 in the density of spines in LV pyramidal neurons (**Fig 4 B**), specifically in their basal  
215 dendrites. Interestingly, spine density of either cortical LV apical dendrites or dendrites in  
216 striatal MSNs did not change (**Fig 4 C-D**).

217

218 Based on these results, we investigated differences in spine morphology in the M1 LV  
219 pyramidal neurons that could explain the increased motor learning in the KO mice. Indeed,  
220 RTP801 KO animals displayed more filopodia but less branched spines (**Fig 5 A** and **Fig**  
221 **EV4**). In line with this, when related with the total number of headed spines, we observed a  
222 higher percentage of mushroom spines in the basal dendrites of KO animals (**Fig 5 B.1,**  
223 **C.1**). Moreover, their head area was also increased. On the contrary, no differences were  
224 found in either the percentage or head area of thin spines (**Fig 5 C.1, C.2**).

225 We next asked whether this evidence in LV pyramidal neurons based on Golgi-Cox staining  
226 could be supported ultra-structurally by Transmission Electron Microscopy (TEM).  
227 Interestingly, we observed that KO mice synapses had bigger postsynaptic area (around  
228 10%) (**Fig 6 A**) along with a wider PSD area, length and thickness (around 5%, each) (**Fig 6**  
229 **B**). Interestingly KO mice exhibited a higher percentage of contacts containing mitochondria,  
230 mostly at the presynaptic compartment although the postsynaptic compartment showed a  
231 similar tendency (**Fig 6 C**). We did not find significant differences in the percentage of  
232 presynapses with more than one post-synapse, postsynapses with more than one  
233 presynapse or postsynapses with spine apparatus (**Fig EV5 a-c**). Altogether, these results

234 support the idea that although the KO mice have a decreased number of spines in the motor  
235 cortex LV, they displayed a more efficient synaptic structure, leading to an improvement of  
236 motor learning skills.

237

### 238 **The lack of RTP801 elevates GluA1 AMPAR post-synaptically**

239 In line with the reduction in spine density in neurons from motor cortex LV in the RTP801 KO  
240 mice (**Fig 4B**), biochemical analysis of KO motor cortex crude synaptic fractions confirmed a  
241 decrease in PSD-95 (**Fig 7 A**) but an specific enrichment of synaptic GluA1 (**Fig 7 B**), a  
242 crucial AMPAR subunit that has been described to be a key mediator in the acquisition of  
243 new motor skills (Kida *et al*, 2016; Roth *et al*, 2020). On the other hand, GluA2 AMPAR  
244 subunit, the prototypical auxiliary subunit of AMPARs stargazin or the N-methyl-D-  
245 aspartate receptor (NMDAR) subunit GluN2B did not change in KO mice in comparison to  
246 WT (**Fig 7 B-C**). Interestingly, we observed that levels of TrkB were also elevated in total  
247 homogenates in the RTP801 KO motor cortex (**Fig 7 D**), supporting the idea of a synaptic  
248 strengthening. By immunostaining WT and KO sections against PSD95 and GluA1  
249 postsynaptic markers, we confirmed these initial biochemical observations specifically in M1  
250 layer V. Indeed, the number of PSD-95 and GluA1 puncta diminished in the KO animals (**Fig**  
251 **7E, H**) although the area and the intensity of the GluA1 dots were increased (**Fig 7 F-G**).  
252 Area and intensity of PSD-95 positive dots showed a non-significant increased tendency, as  
253 well (**Fig 7 F-G**). Altogether, these results suggest a novel synaptic role for RTP801  
254 modulating synaptic strength and motor learning in the motor cortex (**Fig 8**).

255

### 256 **DISCUSSION**

257 Here, we show a novel role for RTP801 in the modulation of synaptic plasticity in motor  
258 learning. The lack of RTP801 in mice resulted in decreased spine density and enhanced  
259 synaptic transmission in the primary motor cortex together with a better performance in the  
260 accelerating rotarod but altered gait and clasping. This improvement in motor learning skills

261 was associated with alterations in dendritic spine structure. Cortical neurons in the motor  
262 cortex M1 layer V showed higher number of filopodia- and a mushroom-like morphology and  
263 TEM analyses revealed increased postsynaptic size in neurons from LV. In line with that,  
264 trained RTP801 KO mice showed higher levels of synaptic AMPAR subunit GluA1 and a  
265 general increase in TrkB levels.

266

267 Since the only evidences that RTP801 could modulate synaptic plasticity were found in  
268 pathological conditions, here we studied for the first time the putative role of RTP801 in a  
269 physiological context. In a context of depressive disorders, RTP801 KO mice were found  
270 resilient to stress-induced synaptic loss in the PFC (Ota *et al*, 2014; Kabir *et al*, 2017).  
271 Moreover, RTP801 downregulation alleviated stress-induced neurodegeneration in a mouse  
272 model of genetic PD (Zhang *et al*, 2018). More recently, our group described that synaptic  
273 RTP801 mediated motor-learning dysfunction in the R6/1 mouse model of HD (Martín-Flores  
274 *et al*, 2020). However, its potential physiological synaptic role has never been investigated in  
275 depth.

276

277 Hence, we initially confirmed that RTP801 was present in the synapses from a wide range of  
278 human and murine samples, as we previously described in HD murine models and HD  
279 human postmortem samples (Martín-Flores *et al*, 2020). Interestingly, RTP801 was highly  
280 enriched in human and rat crude synaptosomes but not that elevated in synaptic WT mice  
281 samples. In line with that, in cortical cultures RTP801 was localized mostly post-synaptically.  
282 Interestingly, we found that spine density decreased in cortical cultures when RTP801  
283 expression was transiently downregulated and that was translated with an increase in the  
284 amplitude and frequency of mEPSCs in KO cortical cultures. An opposite effect was found  
285 when ectopic RTP801 was expressed in hippocampal primary cultures.

286 Previous studies pointed out that RTP801 KO mice had normal brains and similar behavior  
287 to WT animals (Brafman *et al*, 2004; Ota *et al*, 2014). However, no thorough behavioral,  
288 biochemical and histological studies were performed in these animals. Macroscopically, we

289 found that the KO mice brain weight less than WT brains, independently of the total body  
290 size, and it was likely due to a decrease in the cell density of M1 LV. Noteworthy, this  
291 difference can be explained by the developmental role of RTP801, which regulates both  
292 neurogenesis by regulating neuroprogenitors' proliferation rate and neuronal  
293 migration/differentiation in the cortex (Malagelada *et al*, 2011).

294

295 *In vivo*, the lack of RTP801 reduced spine density in the M1 layer V in the KO mice vs. WT.  
296 We observed a similar result when we transiently downregulated RTP801 in cultured cortical  
297 neurons (**Fig 1C**). Interestingly, KO animals showed higher synaptic performance in KO  
298 motor cortex (LV) slices *versus* WT. These results therefore suggest that the lack of RTP801  
299 decreases spine density but enhances synaptic function.

300

301 To investigate the role of RTP801 in synaptic plasticity *in vivo* we performed several motor  
302 behavioral tests and checked circuitries that control movement and motor learning. RTP801  
303 KO mice showed gait impairment but no alterations in general locomotor activity. It is  
304 noteworthy that gait abnormalities are more likely to be explained by cerebellar dysfunction  
305 and more studies will be needed in the future. Despite gait alterations, the lack of RTP801  
306 improved mouse motor learning skills. These results are in line with the work of Zhang *et al*  
307 (2018) (Zhang *et al*, 2018), where the knockdown of RTP801 in the substantia nigra partially  
308 rescued motor function in a mouse model of PD subjected to chronic-restraint stress. In  
309 addition, we recently described that striatal RTP801 knock down in the R6/1 mouse model of  
310 HD prevented from motor-learning deficits (Martín-Flores *et al*, 2020).

311

312 The most characterized circuitry involved in motor learning is the corticostriatal pathway.  
313 Pyramidal neurons from the M1 along with striatal MSNs predominantly undergo synaptic  
314 dynamics under motor learning (Tjia *et al*, 2017; Costa *et al*, 2004). Indeed, spine density in  
315 the M1 LV neurons from the RTP801 KO mice, specifically in their basal dendrites, was  
316 decreased. We did not observe any differences in spine density in the apical dendrites of the



317 same neurons or in the striatal MSNs from the KO mice. Related to the cortex, Ota and  
318 colleagues (Ota *et al*, 2014) did not find spine density differences in the prefrontal cortex  
319 (PFC) between WT and RTP801 KO mice in basal conditions. This fact, together with the  
320 absence of differences in the striatum in our work, may point towards a region-specific role  
321 of RTP801 in the normal (or physiological, non-stressed) mouse brain. Hence, RTP801  
322 could be contributing to motor learning at the basal dendrites of LV pyramidal neurons.

323

324 This speculation was also supported by the observations of the synaptic morphology in the  
325 motor cortex LV pyramidal neurons, where we observed a significant increase of filopodia  
326 along with a decrease in branched spines in the KO animals. Although the physiological  
327 meaning of branched spines is still in debate, filopodia have been proposed to be precursors  
328 of spines, to develop an explorative role to increase the probability to form a synapse (Ziv &  
329 Smith, 1996; Zuo *et al*, 2005). Thus, an increase in this type of spines could explain the  
330 better performance of the KO mice in the accelerating rotarod. However, filopodia-related  
331 plasticity must have a fine-tuned regulation, since a high remodeling rate might be  
332 troublesome (reviewed in (Ozcan, 2017)). Indeed, among headed spines, we detected an  
333 increase in the percentage and head area of mushroom-like spines from basal dendrites  
334 between WT and KO animals. This fact correlates well with the change of spine morphology  
335 and the function of the spines, and in the end, with an increase in synaptic strength of the  
336 area (Arellano *et al*, 2007; Yuste *et al*, 2000).

337

338 We confirmed a more complex postsynaptic compartment by TEM. The lack of RTP801 led  
339 to an increase in postsynaptic area in the synapses of the region of study, although no  
340 differences were detected in the presynaptic compartment. Strikingly, greater postsynaptic  
341 density size was detected in RTP801 KO animals in the same area. Interestingly, a positive  
342 correlation between the amount of PSD and spine size (Arellano *et al*, 2007) and the former  
343 with synaptic strength (Béique & Andrade, 2003; Meyer *et al*, 2014) has been described.  
344 Moreover, KO synaptic contacts present more mitochondria, whose presence at the synapse



345 has been related with a role in controlling plasticity processes (Todorova & Blokland, 2017;  
346 Lee *et al*, 2018)). Our ultrastructural analyses, therefore, seem to indicate that, although the  
347 lack of RTP801 causes a decrease in spine density, the remaining spines are able to  
348 compensate this reduction at a structural level.

349

350 Interestingly, we observed a differential synaptic composition in the remaining spines in the  
351 M1 LV from RTP801 KO mice versus WT animals. We observed decreased levels of  
352 synaptic PSD-95 in crude synaptosomes that go in line with the decreased number of PSD-  
353 95 positive puncta in M1 LV observed by immunohistochemistry, along with a specific  
354 elevation of GluA1 AMPAR subunit at the synapses in M1 LV of KO mice. Calcium  
355 impermeable AMPARs (GluA2-containing; CI-AMPARs) are the most prevalent type of  
356 AMPAR in neurons (Lu *et al*, 2009) where they are responsible for postsynaptic currents and  
357 the depolarization of the postsynaptic neuron. In contrast, GluA1 subunit confers calcium  
358 permeability to the receptor. Calcium permeable AMPAR (CP-AMPARs) are mostly engaged  
359 to synaptic regulation and intracellular signaling (reviewed in (Man, 2011)). Therefore, the  
360 improved performance observed in the KO mice could be explained at least in part with this  
361 change in the AMPA receptors subunit composition. This could favor the presence of CP-  
362 AMPARs with high calcium permeability and then, in consequence, signaling activation and  
363 synaptic regulation. Interestingly, previous studies have demonstrated that motor learning  
364 induces an increase in GluA1 levels in dendritic spines in the motor cortex. This increment in  
365 GluA1 subunits are key modulators of synaptic plasticity induced by motor skill learning  
366 (Roth *et al*, 2020). The mechanism by which RTP801 could mediate this specific AMPAR  
367 subunits composition at the synapses to modulate motor learning has to be explored yet.  
368 Ectopic RTP801 overexpression showed the opposite result, since it reduced GluA1 puncta  
369 intensity in cultured hippocampal neurons. Remarkably, RTP801 silencing in R6/1 mice  
370 induced an increase of total levels of GluA1 and TrkB neurotrophin receptor. Indeed, in  
371 trained RTP801 KO mice we could also observe an increase in total levels of TrkB receptor.

372 This result is in line with other works describing that synaptic activity modulates both BDNF  
373 levels and TrkB receptors amount and localization (Guo *et al*, 2014; Lauterborn *et al*, 2000).

374

375 In summary, our work indicates a novel synaptic function for RTP801 in motor learning by  
376 modulating synaptic structure, composition and plasticity. This finding is important since  
377 motor learning impairment is a key feature of neurodegenerative diseases such as PD and  
378 HD. Altogether, our results point towards RTP801 downregulation as a promising  
379 therapeutic strategy to ameliorate motor learning dysfunction in these diseases.

380

## 381 **MATERIALS AND METHODS**

382

### 383 **Animals**

384 Transgenic RTP801 knock out mouse strain was generated by Lexicon Inc. as described in  
385 (Brafman *et al*, 2004). RTP801 knockout mice were obtained by homozygous pairing. Thus,  
386 wild type mice were bred from the RTP801 KO founder strains to obtain a C57Bl6/129sv  
387 background. RTP801 knock out and wild type mice were housed under controlled conditions  
388 (22°C, 40-60% humidity in a 12-hour light/dark cycle) with water and food available *ad*  
389 *libitum*. All the animals analyzed in this study were 2 months-old adult mice.

390

391 For further biochemical analyses, Golgi staining and TEM, mice were euthanized by cervical  
392 dislocation and tissue was dissected out. For immunohistochemistry, animals were  
393 processed as described elsewhere (Creus-Muncunill *et al*, 2018). Briefly, animals were  
394 anesthetized with 60mg/kg dolethal and intracardially perfused with 4% PFA. Coronal 25µm-  
395 thick brain sections were obtained with a cryostat.

396

### 397 **Rat primary cultures**

398 Rat cortical and hippocampal primary cultures were obtained from embryonic day 18  
399 Sprague-Dawley rats as previously described (Canal *et al*, 2016). Cells were either

400 transduced with lentiviral particles carrying a control shRNA or a specific shRNA against  
401 RTP801 or transfected with lipofectamine 2000 (Thermo Fisher Scientific) with pCMS  
402 vectors expressing eGFP (donated by Dr. Lloyd Greene, Columbia University) or eGFP-  
403 fused RTP801 protein (Romaní-Aumedes *et al*, 2014). The sequences to downregulate or  
404 overexpress RTP801 were previously described in (Malagelada *et al*, 2006).

405

#### 406 **Mouse primary cultures**

407 Mouse primary cortical cultures were obtained from embryonic day 15 mice. Coverslips were  
408 coated for 1h with 0.1 mg/ml poly-D-lysine (Merck) and then 3.5h with 0.018 mg/ml laminin  
409 (Thermo Fisher Scientific). Briefly, cortices were dissected out and chemically digested with  
410 41.66 $\mu$ M Trypsin for 10 minutes. Following mechanical digestion, cells were plated on  
411 coverslips at a density of 25.000 cells/cm<sup>2</sup> and maintained in Neurobasal-A medium  
412 supplemented with B27, GlutaMAX (all from Gibco), 33.3 mM Glucose and 1% penicillin-  
413 streptomycin (Sigma) in a 5% CO<sub>2</sub> atmosphere and 37°C.

414

#### 415 **Crude synaptosomal fractionation**

416 Tissue (rat, mice or *postmortem* human brains) or cultured cells were homogenized in  
417 Krebs-Ringer buffer (125mM NaCl, 1.2mM KCl, 22mM NaHCO<sub>3</sub>, 1mM NaH<sub>2</sub>PO<sub>4</sub>, 1.2mM  
418 MgSO<sub>4</sub>, 1.2mM CaCl<sub>2</sub>, 10 mM Glucose, 0.32 M Sucrose; pH 7.4). For samples in Figure 7,  
419 mice were sacrificed one week after behavioral testing. Initial lysate was first centrifuged at  
420 1.000g for 10 minutes. Supernatant (homogenate) was centrifuged for 20 minutes at  
421 16.000g to obtain the cytosolic fraction (supernatant) and the crude synaptosomal fraction  
422 (pellet), that was resuspended in Krebs-Ringer buffer.

423

#### 424 **Western blotting**

425 Samples were resolved in NuPAGE™Novex™ polyacrylamide gels and proteins were  
426 transferred to nitrocellulose membranes with the iBlot system (all from Thermo Fisher  
427 Scientific). Indicated primary antibodies were incubated overnight at 4°C diluted in Tris-

428 buffered saline containing 0.1% Tween-20 and 5% BSA. Secondary antibodies (Thermo  
429 Fisher Scientific) were diluted in TBS-Tween with non-fat dry 5% milk (Bio-rad) for 1 hour.  
430 Proteins were detected with Supersignal™ West Pico Plus chemiluminiscent substrate  
431 (Thermo Fisher Scientific) and images were acquired with ChemiDoc™ (Bio-Rad). The  
432 following antibodies were used: RTP801 (1:500, Proteintech), HRP-conjugated anti-beta  
433 actin (1:100.000; Sigma), PSD-95 (1:1000; Thermo Fisher Scientific), SV2a and GFP  
434 (1:1000; Santa Cruz Biotechnology), GluA1, GluA2, Stargazin (1:1000; Merck Millipore),  
435 GluN2B (1:1000; Cell Signaling Technology) and TrkB (1:1000; BD Biosciences).

436

### 437 **Immunofluorescence**

438 Cells were fixed in 4% PFA and permeabilized with 0.25% Triton-X. Blocking and antibody  
439 incubation was performed with Superblock (Thermo Fisher Scientific). Primary antibodies  
440 were incubated over night at 4°C and secondary antibodies for 2h at room temperature. For  
441 mouse brain tissue immunofluorescence, sections were washed with PBS and incubated for  
442 30 min in NH<sub>4</sub>Cl. Next, sections were blocked with 0.3% Triton-100 10% NGS in PBS for 2h  
443 prior incubation with the primary antibodies diluted in blocking solution overnight at 4°C.  
444 Later, sections were washed and incubated for 2h with the secondary antibodies. Slices  
445 were then washed with PBS. Both cells and tissue samples were mounted with Prolong Gold  
446 antifade mountant (Thermo Fisher Scientific). The following antibodies were used: GFP  
447 (1:500), SV2a (1:100) (both from Santa Cruz Biotechnology), PSD-95 (1:50; Thermo Fisher  
448 Scientific), GluA1 (1:250-1:500; Merck Millipore) and RTP801 (1:100; Proteintech).  
449 AlexaFluor-488 or -555 secondary antibodies (1:500) and Hoechst33342 (1:5000) were from  
450 Thermo Fisher Scientific. Images were obtained with a Leica LCS SL or a Zeiss LSM880  
451 confocal microscopes with a 1024x1024 pixel resolution and a 63x magnification and were  
452 analyzed with ImageJ. For in vitro experiments in cortical neurons, at least 25 dendrites per  
453 group from three independent experiments were analyzed. For in vitro experiments in  
454 hippocampal neurons, at least 12 neurons per group were analyzed from three independent  
455 experiments. For double-labeled GluA1-PSD-95-positive clusters in brain slices, images

456 were acquired with 4x digital zoom (33.74x33.74  $\mu$ m). For each mouse three representative  
457 images from two different coronal sections were analyzed. Colocalization was considered  
458 when there was at least one common pixel between GluA1 and PSD-95 detected puncta.

459

#### 460 **Nissl staining**

461 Slices were stained for 45 min with 0.2 mg/ml Cresyl violet (Sigma) in a 0.1 M acetic acid 0.1  
462 M sodium acetate solution. Next, slices were washed in distilled water and then dehydrated  
463 with ethanol (70, 95, 100%, 5 minutes each), washed with xylol and mounted with DPX  
464 media. Images were obtained with a 10x magnification with a Zeiss Axiolab.

465

#### 466 **Behavioral assessment**

467 **Footprint test:** Mice's fore and hindlimbs were painted in blue and red, respectively, with  
468 non-toxic ink. Animal's gait was then recorded letting them walk through a tunnel on white  
469 paper (10 cm wide, 40 cm long). The test was performed three times on the same day. In  
470 each trial three consecutive steps were measured for each parameter (stride, sway, stance,  
471 overlap).

472 **Open field test:** mice were placed in a 40x40x40 cm arena. The center area was considered  
473 as the central squared 20x20 cm space. Light intensity was 24 lux though-out the periphery  
474 and 29 lux in the center. Mice's movement was tracked and recorded for 10 minutes using  
475 SMART 3.0 Software (Panlab). Other parameters related to anxiety-like behaviors, like  
476 number of groomings, rearings and defecations were also monitored.

477 **Accelerating rotarod:** one day after the Open field test mice were subjected to the  
478 Accelerating rotarod test. Mice were placed on a 3 cm rod with an increasing speed from 4  
479 to 40 rpm over 5 minutes. Latency to fall was recorded as the time mice spent in the rod  
480 before falling. Accelerating rotarod test was performed for 4 days, 4 trials per day. Trials in  
481 the same day were separated by 1 hour.

482 **Clasping behavior:** Hindlimb clasping was measured by picking up mice at the base of the  
483 tail. In order to classify this phenotype we used the scale described in (Guyenet *et al*, 2010)

484 with minor modifications: 0 means no hind paw retraction, 1, one hindlimb retracted, 2, both  
485 hindlimbs partially retracted, and 3 when the 2 hindlimbs were totally retracted.

486

### 487 **Golgi Staining and spine density and morphology analyses**

488 Golgi-Cox impregnation was performed with fresh brain hemispheres from, mice sacrificed  
489 one week after behavioral testing with FD Rapid GolgiStain™ kit (FD Neurotechnologies)  
490 following manufacturer's instructions. 100  $\mu\text{m}$  slices were obtained with a Leica vibratome  
491 and mounted on gelatin-coated slides before final staining.

492 For spine density analyses only pyramidal neurons from layer V in the primary motor cortex  
493 or medium spiny neurons (MSNs) from the dorsolateral striatum were taken into account.

494 Spine density was quantified in dendritic segments of at least 10  $\mu\text{m}$  and 30 different  
495 secondary/tertiary dendrites per animal were analyzed. Analyzed dendrites were 50% apical,  
496 50% basal.

497 Spine morphology analyses were performed in motor cortex layer V pyramidal neurons.  
498 Spines in 5 apical and 5 basal secondary/tertiary dendrites were analyzed for each animal (6  
499 WT and 4 KO), in segments of at least 10  $\mu\text{m}$  long. A total of 100-125 apical and 100-125  
500 basal spines were analyzed per animal. Branched, filopodia and stubby spines were visually  
501 categorized. For headed spines, head area was measured in all headed spines and  
502 thin/mushroom classification was performed depending on the mean head area for each  
503 genotype (spines with head area greater than the mean were considered as mushroom  
504 spines and smaller ones were categorized as thin spines). In spine density and morphology  
505 analyses, animal genotype was blind for the experimenter.

506

### 507 **Transmission electron microscopy**

508 2 months old RTP801 knock out (n=4) and wild type mice (n=4) were sacrificed one week  
509 after behavioral testing and motor cortex was dissected from coronal sections. From these  
510 sections, the lower half of the motor cortex, including Layer V and VI, was isolated and fixed

511 overnight in 2% glutaraldehyde 2% paraformaldehyde in 0.12 M phosphate buffer. After  
512 fixation, tissue was processed and analyzed as previously described in (Bosch *et al*, 2016).  
513 Electron micrographs were randomly taken at 25.000x with a TEM JEOL J1010 (tungsten  
514 filament), with a CCD Orius (Gatan) and software Digital Micrograph (Gatan). Spine density,  
515 pre/postsynaptic area and postsynaptic density area, length and thickness were determined  
516 (n=45-50 images for each animal) with ImageJ software. In all TEM analyses, animal  
517 genotype was blind for the experimenter.

518

### 519 **Electrophysiology**

520 **Rat neuronal cultures:** miniature excitatory postsynaptic currents (mEPSCs) were  
521 measured in rat primary hippocampal neurons plated on glass coverslips as previously  
522 described (Gilbert *et al*, 2016).

523 **Mouse cortical cultures:** Electrophysiological recordings of cultured cortical pyramidal  
524 neurons –chosen in basis of their characteristic pyramidal morphology– were performed at  
525 14 DIV. Whole-cell patch-clamp currents were recorded at room temperature (25–26 °C) in  
526 extracellular solution containing (in mM): 130 NaCl, 3.5 KCl, 10 HEPES, 15 glucose and 2  
527 CaCl<sub>2</sub> (pH 7.4; osmolarity 305 mOsm/Kg with sorbitol). AMPAR-mediated miniature  
528 excitatory postsynaptic currents (mEPSCs) were isolated adding to the extracellular solution  
529 1μM tetrodotoxin to block evoked synaptic transmission, 100μM picrotoxin to block  
530 GABA<sub>A</sub> receptors and 50μM APV to block NMDA receptors. Recording electrodes were  
531 fabricated from borosilicate glass with a final resistance of 4–5 MΩ and filled with an internal  
532 solution containing (in mM): 120 K-Gluconate, 16 KCl, 8 NaCl, 10 HEPES, 0.2 ethylene  
533 glycol tetraacetic acid (EGTA), 2 MgATP, 0.3 Na<sub>2</sub>GTP (pH 7.2; osmolarity 291 with sorbitol).  
534 Recordings were acquired at a sampling rate of 5KHz and were filtered at 2Hz. Miniature  
535 events were detected and analyzed with the WaveMetrics Igor Pro open-source software  
536 package Neuromatic (Rothman & Silver, 2018). Frequency was determined by dividing the  
537 number of detected events by the recorded time (in seconds).

538



## 539 **Electrophysiological field recordings**

540 Two-month old (female and male) mouse brain sagittal sections were obtained on a  
541 vibratome (Microm HM 650 V, Thermo Scientific, Waltham, MA, USA) at 350  $\mu\text{m}$  thickness  
542 in oxygenated (95%  $\text{O}_2$ , 5%  $\text{CO}_2$ ) ice-cold aCSF and then transferred to a oxygenated 32°C  
543 recovery solution for 15 min as previously described (Choi *et al*, 2019). Then, slices were  
544 transferred to oxygenated aCSF at room temperature and left for at least 1 h before  
545 electrophysiological field recording. Following recovery, mouse 350  $\mu\text{m}$  thick brain slices  
546 were placed in a multi electrode array (MEA) recording dish and fully submerged in  
547 oxygenated aCSF at 37 °C. Electrophysiological data were recorded with a MEA set-up from  
548 Multi Channel Systems MCS GmbH (Reutlingen, Germany) composed of a 60 channels  
549 USB-MEA60-inv system. Experiments were carried out with 60MEA200/30iR-ITO MEA  
550 dishes consisting of 60 planar electrodes (30  $\mu\text{m}$  diameter) arranged in an 8x8 array and  
551 placed in the motor cortex slice surface. Raw traces were recorded for 5 min from 58  
552 electrodes simultaneously, sampled at 5 kHz. Raw data were high-pass filtered with a 200-  
553 Hz Butterworth 2<sup>nd</sup> order filter, the noise level calculated by the standard deviation of the  
554 recorded signal on each electrode and spikes were identified as currents with a negative  
555 amplitude larger than -30 mV and slope values between 0.2 and 1. To quantify burst activity  
556 in spike-trains we applied the MaxInterval Method (Legendy & Salcman, 1985) with the  
557 following parameter values: maximum beginning ISI, 200 ms; maximum end ISI, 200 ms;  
558 minimum interburst interval, 20 ms, minimum burst duration 20 ms; minimum number of  
559 spikes in a burst, 5. Software for recording and signal processing was MC Rack from Multi  
560 Channel Systems. Using a digital camera during recording assessed the position of the brain  
561 slices on the electrode field to analyze information from electrodes specifically positioned on  
562 cortical layer V (**Fig 2 H**).

563

## 564 **Experimental design and statistical analyses**



565 Graphs show results reported as mean $\pm$ SEM. Data was assessed for normality using  
566 D'Agostino-Pearson, Shapiro-Wilk or Kolmogorov-Smirnov. Statistical analyses were  
567 performed using unpaired, two-tailed Student's T-test for normally distributed data, Mann-  
568 Whitney test for non-parametric data and Two-way ANOVA followed by Bonferroni's *post-*  
569 *hoc* tests to compare multiple groups, as appropriate and indicated in the figure legends.  
570 Values of  $P < 0.05$  were considered as statistically significant.

#### 571 **Ethical Approval and Consent to participate:**

572 All procedures were performed in compliance with the NIH Guide for the Care and Use of  
573 Laboratory Animals and approved by the local animal care committee of Universitat de  
574 Barcelona following European (2010/63/UE) and Spanish (RD53/2013) regulations for the  
575 care and use of laboratory animals.

576 Human samples were obtained following the guidelines and approval of the local ethics  
577 committee (Hospital Clínic of Barcelona's Clinical Research Ethics Committee).

578

579

#### 580 **ACKNOWLEDGEMENTS:**

581 The authors thank Dr. Sílvia Ginés, Dr. Verónica Brito and Dr. Albert Giralt for helpful  
582 discussion. We also thank Dr. Albert Martínez from the Faculty of Biology from our same  
583 University, for his TEM assessment and guidance. We thank the Neurological Tissue Bank  
584 of the Biobanc-Hospital Clínic-IDIBAPS (Barcelona, Spain) and Dr. Ellen Gelpi for providing  
585 human tissue samples. We thank Maria Calvo from the Advanced Microscopy Unit, Scientific  
586 and Technological Centers, University of Barcelona, for their support and advice in confocal  
587 techniques.

588

#### 589 **FUNDING:**

590 Financial support was obtained from the Spanish Ministry of Economy and Competitiveness  
591 MINECO (grants SAF2014-57160-R (AEI/FEDER, UE) for CM and J.A., SAF2017-88076-R

592 (AEI/FEDER, UE) for J.A & M.J.R., and SAF2017-88812 R (AEI/FEDER, UE) for C.M. We  
593 also thank Portal d'Avall S.L. for L.P-S. fellowship. Mice and neuron illustrations were  
594 designed by Jorge Padilla Rubio.

595

596 **AUTHOR CONTRIBUTION:**

597 L.P-S., N.M-F., M.M., J.S., A.LL., J.R-A., J.S., G.C., M.C., D.S., X.G., J.A and C.M. have  
598 contributed in the conception and design of the study, acquisition and analysis of data and in  
599 drafting the manuscript and figures. G.C., E.G-G., N.S-F., S.F-G., J.P.G., M.J.R., H-Y.M.,  
600 E.F. and D.W., have contributed in acquisition and analysis of data and in drafting the  
601 manuscript and figures.

602

603 **CONFLICT OF INTERESTS:** None

604

605

606

607 **REFERENCES:**

608 Anderson CT, Sheets PL, Kiritani T & Shepherd GMG (2010) Sublayer-specific microcircuits  
609 of corticospinal and corticostriatal neurons in motor cortex. *Nat Neurosci* 13: 739–744

610 Arellano JI, Benavides-Piccione R, Defelipe J & Yuste R (2007) Ultrastructure of dendritic  
611 spines: correlation between synaptic and spine morphologies. *Front Neurosci* 1: 131–

612 43

613 Béïque JC & Andrade R (2003) PSD-95 regulates synaptic transmission and plasticity in rat  
614 cerebral cortex. *J Physiol* 546: 859–867 doi:10.1113/jphysiol.2002.031369 [PREPRINT]

615 Bosch C, Muhaisen A, Pujadas L, Soriano E & Martínez A (2016) Reelin Exerts Structural,  
616 Biochemical and Transcriptional Regulation Over Presynaptic and Postsynaptic

617 Elements in the Adult Hippocampus. *Front Cell Neurosci* 10: 138

618 Brafman A, Mett I, Shafir M, Gottlieb H, Damari G, Gozlan-Kelner S, Vishnevskia-Dai V,

619 Skaliter R, Einat P, Faerman A, *et al* (2004) Inhibition of oxygen-induced retinopathy in

- 620 RTP801-deficient mice. *Invest Ophthalmol Vis Sci* 45: 3796–3805
- 621 Calabresi P, Centonze D, Gubellini P, Marfia GA, Pisani A, Sancesario G & Bernardi G  
622 (2000) Synaptic transmission in the striatum: from plasticity to neurodegeneration. *Prog*  
623 *Neurobiol* 61: 231–65
- 624 Calabresi P, Galletti F, Saggese E, Ghiglieri V & Picconi B (2007) Neuronal networks and  
625 synaptic plasticity in Parkinson's disease: beyond motor deficits. *Park Relat Disord* 13  
626 Suppl 3: S259-62
- 627 Canal M, Martín-Flores N, Pérez-Sisqués L, Romani-Aumedes J, Altas B, Man H-Y, Kawabe  
628 H, Alberch J & Malagelada C (2016) Loss of NEDD4 contributes to RTP801 elevation  
629 and neuron toxicity: implications for Parkinson's disease. *Oncotarget*
- 630 Choi K, Holly EN, Davatolhagh MF, Beier KT & Fuccillo M V. (2019) Integrated anatomical  
631 and physiological mapping of striatal afferent projections. *Eur J Neurosci* 49: 623–636
- 632 Chou AH, Yeh TH, Ouyang P, Chen YL, Chen SY & Wang HL (2008) Polyglutamine-  
633 expanded ataxin-3 causes cerebellar dysfunction of SCA3 transgenic mice by inducing  
634 transcriptional dysregulation. *Neurobiol Dis* 31: 89–101
- 635 Costa RM, Cohen D & Nicoletis MAL (2004) Differential corticostriatal plasticity during fast  
636 and slow motor skill learning in mice. *Curr Biol* 14: 1124–1134
- 637 Creus-Muncunill J, Rué L, Alcalá-Vida R, Badillos-Rodríguez R, Romani-Aumedes J, Marco  
638 S, Alberch J, Perez-Otaño I, Malagelada C & Pérez-Navarro E (2018) Increased Levels  
639 of Rictor Prevent Mutant Huntingtin-Induced Neuronal Degeneration. *Mol Neurobiol*
- 640 Fu M, Yu X, Lu J & Zuo Y (2012) Repetitive motor learning induces coordinated formation of  
641 clustered dendritic spines in vivo. *Nature* 483: 92–96
- 642 Gilbert J, Shu S, Yang X, Lu Y, Zhu L-Q & Man H-Y (2016)  $\beta$ -Amyloid triggers aberrant over-  
643 scaling of homeostatic synaptic plasticity. *Acta Neuropathol Commun* 4: 131
- 644 Guo L, Xiong H, Kim J-I, Wu Y-W, Lalchandani RR, Cui Y, Shu Y, Xu T & Ding JB (2015)  
645 Dynamic rewiring of neural circuits in the motor cortex in mouse models of Parkinson's  
646 disease. *Nat Neurosci* 18: 1299–1309
- 647 Guo W, Ji Y, Wang S, Sun Y & Lu B (2014) Neuronal activity alters BDNF-TrkB signaling

- 648 kinetics and downstream functions. *J Cell Sci* 127: 2249–60
- 649 Guyenet SJ, Furrer SA, Damian VM, Baughan TD, La Spada AR & Garden GA (2010) A  
650 Simple Composite Phenotype Scoring System for Evaluating Mouse Models of  
651 Cerebellar Ataxia. *J Vis Exp*
- 652 Hintiryan H, Foster NN, Bowman I, Bay M, Song MY, Gou L, Yamashita S, Bienkowski MS,  
653 Zingg B, Zhu M, *et al* (2016) The mouse cortico-striatal projectome. *Nat Neurosci* 19:  
654 1100–1114
- 655 Kabir ZD, Lee AS, Burgdorf CE, Fischer DK, Rajadhyaksha AM, Mok E, Rizzo B, Rice RC,  
656 Singh K, Ota KT, *et al* (2017) Cacna1c in the Prefrontal Cortex Regulates Depression-  
657 Related Behaviors via REDD1. *Neuropsychopharmacology* 42: 2032–2042
- 658 Kida H, Tsuda Y, Ito N, Yamamoto Y, Owada Y, Kamiya Y & Mitsushima D (2016) Motor  
659 Training Promotes Both Synaptic and Intrinsic Plasticity of Layer II/III Pyramidal  
660 Neurons in the Primary Motor Cortex. *Cereb Cortex* 26: 3494–3507
- 661 Labadorf A, Choi SH & Myers RH (2018) Evidence for a Pan-Neurodegenerative Disease  
662 Response in Huntington’s and Parkinson’s Disease Expression Profiles. *Front Mol*  
663 *Neurosci* 10: 430
- 664 Lauterborn JC, Lynch G, Vanderklish P, Arai A & Gall CM (2000) Positive modulation of  
665 AMPA receptors increases neurotrophin expression by hippocampal and cortical  
666 neurons. *J Neurosci* 20: 8–21
- 667 Lee A, Hirabayashi Y, Kwon SK, Lewis TL & Polleux F (2018) Emerging roles of  
668 mitochondria in synaptic transmission and neurodegeneration. *Curr Opin Physiol* 3: 82–  
669 93 doi:10.1016/j.cophys.2018.03.009 [PREPRINT]
- 670 Legendy CR & Salcman M (1985) Bursts and recurrences of bursts in the spike trains of  
671 spontaneously active striate cortex neurons. *J Neurophysiol* 53: 926–939
- 672 Lu W, Shi Y, Jackson AC, Bjorgan K, During MJ, Sprengel R, Seeburg PH & Nicoll RA  
673 (2009) Subunit Composition of Synaptic AMPA Receptors Revealed by a Single-Cell  
674 Genetic Approach. *Neuron* 62: 254–268
- 675 Malagelada C, Lopez-Toledano MA, Willett RT, Jin ZH, Shelanski ML & Greene LA (2011)

676 RTP801/REDD1 regulates the timing of cortical neurogenesis and neuron migration. *J*  
677 *Neurosci* 31: 3186–3196

678 Malagelada C, Ryu EJ, Biswas SC, Jackson-Lewis V & Greene LA (2006) RTP801 is  
679 elevated in Parkinson brain substantia nigral neurons and mediates death in cellular  
680 models of Parkinson's disease by a mechanism involving mammalian target of  
681 rapamycin inactivation. *J Neurosci* 26: 9996–10005

682 Malagelada C, Zong HJ & Greene LA (2008) RTP801 is induced in Parkinson's disease and  
683 mediates neuron death by inhibiting Akt phosphorylation/activation. *J Neurosci* 28

684 Man H-Y (2011) GluA2-lacking, calcium-permeable AMPA receptors — inducers of  
685 plasticity? *Curr Opin Neurobiol* 21: 291–298

686 Mangiarini L, Sathasivam K, Sellar M, Cozens B, Harper A, Hetherington C, Lawton M,  
687 Trottier Y, Lehrach H, Davies SW, *et al* (1996) Exon I of the HD gene with an expanded  
688 CAG repeat is sufficient to cause a progressive neurological phenotype in transgenic  
689 mice. *Cell* 87: 493–506

690 Martín-Flores N, Pérez-Sisqués L, Creus-Muncunill J, Masana M, Ginés S, Alberch J, Pérez-  
691 Navarro E & Malagelada C (2020) Synaptic RTP801 contributes to motor-learning  
692 dysfunction in Huntington's disease. *Cell Death Dis* 11: 1–15

693 Martín-Flores N, Romani-Aumedes J, Rué L, Canal M, Sanders P, Straccia M, Allen ND,  
694 Alberch J, Canals JM, Pérez-Navarro E, *et al* (2016) RTP801 Is Involved in Mutant  
695 Huntingtin-Induced Cell Death. *Mol Neurobiol* 53: 2857–2868

696 Martín-Flores N, Romani-Aumedes J, Rue L, Canal M, Sanders P, Straccia M, Allen  
697 NDDNDNDD, Alberch J, Canals JM, Perez-Navarro E, *et al* (2015) RTP801 Is Involved  
698 in Mutant Huntingtin-Induced Cell Death. *Mol Neurobiol* 53: 2857–2868

699 Meyer D, Bonhoeffer T & Scheuss V (2014) Balance and stability of synaptic structures  
700 during synaptic plasticity. *Neuron* 82: 430–443

701 Nosedá R, Belin S, Piguet F, Vaccari I, Scarlino S, Brambilla P, Martinelli Boneschi F, Feltri  
702 ML, Wrabetz L, Quattrini A, *et al* (2013) DDIT4/REDD1/RTP801 is a novel negative  
703 regulator of Schwann cell myelination. *J Neurosci* 33: 15295–305

- 704 Ota KT, Liu RJ, Voleti B, Maldonado-Aviles JG, Duric V, Iwata M, Dutheil S, Duman C,  
705 Boikess S, Lewis DA, *et al* (2014) REDD1 is essential for stress-induced synaptic loss  
706 and depressive behavior. *Nat Med* 20: 531–535
- 707 Ozcan AS (2017) Filopodia: A Rapid Structural Plasticity Substrate for Fast Learning. *Front*  
708 *Synaptic Neurosci* 9: 12
- 709 Peters AJ, Liu H & Komiyama T (2017) Learning in the Rodent Motor Cortex. *Annu Rev*  
710 *Neurosci* 40: 77–97
- 711 Romani-Aumedes J, Canal M, Martín-Flores N, Sun X, Pérez-Fernández V, Wewering S,  
712 Fernández-Santiago R, Ezquerro M, Pont-Sunyer C, Lafuente A, *et al* (2014) Parkin  
713 loss of function contributes to RTP801 elevation and neurodegeneration in Parkinson’s  
714 disease. *Cell Death Dis* 5: e1364
- 715 Romani-Aumedes J, Canal M, Martín-Flores N, Sun X, Pérez-Fernández V, Wewering S,  
716 Fernández-Santiago R, Ezquerro M, Pont-Sunyer C, Lafuente A, *et al* (2014) Parkin  
717 loss of function contributes to RTP801 elevation and neurodegeneration in Parkinson’s  
718 disease. *Cell Death Dis* 5
- 719 Roth RH, Cudmore RH, Tan HL, Hong I, Zhang Y & Huganir RL (2020) Cortical Synaptic  
720 AMPA Receptor Plasticity during Motor Learning. *Neuron* 105: 895-908.e5
- 721 Rothman JS & Silver RA (2018) NeuroMatic: An Integrated Open-Source Software Toolkit  
722 for Acquisition, Analysis and Simulation of Electrophysiological Data. *Front Neuroinform*  
723 12
- 724 Ryu EJ, Angelastro JM & Greene LA (2005) Analysis of gene expression changes in a  
725 cellular model of Parkinson disease. *Neurobiol Dis* 18: 54–74
- 726 Sanes JN & Donoghue JP (2000) Plasticity and Primary Motor Cortex. *Annu Rev Neurosci*  
727 23: 393–415
- 728 Shepherd GMG (2013) Corticostriatal connectivity and its role in disease. *Nat Rev Neurosci*  
729 14: 278–291 doi:10.1038/nrn3469 [PREPRINT]
- 730 Shepherd JD & Huganir RL (2007) The Cell Biology of Synaptic Plasticity: AMPA Receptor  
731 Trafficking. *Annu Rev Cell Dev Biol* 23: 613–643

- 732 Shoshani T, Faerman A, Mett I, Zelin E, Tenne T, Gorodin S, Moshel Y, Elbaz S, Budanov  
733 A, Chajut A, *et al* (2002) Identification of a novel hypoxia-inducible factor 1-responsive  
734 gene, RTP801, involved in apoptosis. *Mol Cell Biol* 22: 2283–2293
- 735 Tjia M, Yu X, Jammu LS, Lu J & Zuo Y (2017) Pyramidal Neurons in Different Cortical  
736 Layers Exhibit Distinct Dynamics and Plasticity of Apical Dendritic Spines. *Front Neural*  
737 *Circuits* 11: 43
- 738 Todorova V & Blokland A (2017) Mitochondria and Synaptic Plasticity in the Mature and  
739 Aging Nervous System. *Curr Neuropharmacol* 15: 166–173
- 740 Xu T, Wang S, Lalchandani RR & Ding JB (2017) Motor learning in animal models of  
741 Parkinson's disease: Aberrant synaptic plasticity in the motor cortex. *Mov Disord* 32:  
742 487–497
- 743 Xu T, Yu X, Perlik AJ, Tobin WF, Zweig JA, Tennant K, Jones T & Zuo Y (2009) Rapid  
744 formation and selective stabilization of synapses for enduring motor memories. *Nature*  
745 462: 915–919
- 746 Yuste R, Majewska A & Holthoff K (2000) From form to function: calcium  
747 compartmentalization in dendritic spines. *Nat Neurosci* 3: 653–659
- 748 Zhang Z, Chu S-F, Wang S-S, Jiang Y-N, Gao Y, Yang P-F, Ai Q-D & Chen N-H (2018)  
749 RTP801 is a critical factor in the neurodegeneration process of A53T  $\alpha$ -synuclein in a  
750 mouse model of Parkinson's disease under chronic restraint stress. *Br J Pharmacol*  
751 175: 590–605
- 752 Ziv NE & Smith SJ (1996) Evidence for a role of dendritic filopodia in synaptogenesis and  
753 spine formation. *Neuron* 17: 91–102
- 754 Zuo Y, Lin A, Chang P & Gan W-B (2005) Development of Long-Term Dendritic Spine  
755 Stability in Diverse Regions of Cerebral Cortex. *Neuron* 46: 181–189
- 756
- 757
- 758 **ABBREVIATIONS:**



759 Alzheimer's disease (AD); Huntington's disease (HD); knock out (KO); mechanistic target of  
760 rapamycin (mTOR); primary motor cortex (M1), motor cortex layer V (LV); mutant huntingtin  
761 (mhtt); microelectrode arrays (MEAs); miniature excitatory postsynaptic currents (mEPSC);  
762 Parkinson's disease (PD); induced pluripotent stem cells (iPSC); postsynaptic density  
763 (PSD); transmission electron microscopy (TEM); tuberous sclerosis complex (TSC1/2);  
764 substantia nigra pars compacta (SNpc); wild type (WT).

765

766

767 **FIGURE LEGENDS:**

768 **Figure 1. RTP801 is present at the synapse and modulates neuronal transmission. A.**

769 **RTP801 protein is found in the synaptic compartment.** Homogenate (H) and crude  
770 synaptic fraction (S) were obtained from human *postmortem cortex (CTX) and putamen*  
771 (*STR*), adult rat cortex (CTX) and striatum (STR), primary cortical cultures at 14 DIVs and  
772 cortex from both 2-months old WT and RTP801 KO mice. Whole cell lysate (L) from NGF-  
773 differentiated PC12 cells was added as a positive control to detect RTP801 in mouse brains.

774 Samples were analyzed by western blot and probed against RTP801 (specific band pointed  
775 out by \*), postsynaptic protein PSD-95 and actin as a loading control. **B. RTP801 is present**

776 **ubiquitously in neurons, including at the synapses.** Primary rat cortical cultures were  
777 fixed at 14DIVs and stained for RTP801 (grey). Phalloidin (red) was used to visualize actin  
778 cytoskeleton. Nuclei were stained with Hoechst33342 (in blue). White arrows point F-actin-  
779 labeled dendritic spines colocalizing with endogenous RTP801 staining. **C. RTP801**

780 **knockdown reduces spine density in cultured cortical neurons.** Primary rat cortical  
781 neurons were transduced with lentiviral particles carrying a GFP-tagged control shRNA or an  
782 shRNA against RTP801. 4 days later (14 DIVs), cells were fixed and analyzed by  
783 immunofluorescence against GFP (green). *Scale bar, 5µm.* **D. Abrogation of RTP801**

784 **expression modulates synaptic plasticity *in vitro*.** **D.1.** Representative 20 seconds  
785 whole-cell recording of mEPSCs at a membrane voltage of  $-70\text{mV}$  from WT or RTP801 KO  
786 mice cultured cortical pyramidal neurons (14 DIV). A magnification (0.5 seconds) for both



787 traces is shown below where asterisks denote the detected events. **D.2.** Example of  
788 averaged mEPSCs (red lines) superimposed on the individual mEPSCs (in black) from a  
789 wild type (average of 962 events) and RTP801 knockout (average of 236 events) culture.  
790 **D.3.** RTP801 KO recordings show differences in mEPSCs mean amplitude. **D.4.** The  
791 frequency of detected events in RTP801 KO neurons was statistically increased compared  
792 with WT. mEPSCs frequencies were obtained from same recordings shown in D.3. All data  
793 is presented as mean  $\pm$  SEM from the recordings performed in 15 WT neurons and 25 KO  
794 neurons from at least six independent neuronal cultures. Statistical analyses for spine  
795 density and mEPSC amplitude were performed with Student's t-test, \* $P < 0.05$ , \*\*\* $P < 0.001$  vs.  
796 shCt/WT and with Mann-Whitney test for mEPSC frequency, \* $P < 0.05$  vs. WT.

797

798 **Figure 2. RTP801 KO mice show decreased brain size, decreased cortical spine**  
799 **density and enhanced synaptic transmission.**

800 **A.** Whole brain extracts from WT and RTP801 KO mice at 2 months of age were subjected  
801 to western blot. Membranes were probed against RTP801 (specific band is pointed out by \*)  
802 and actin as loading control. **B.** 9-weeks long follow-up shows that RTP801 KO animals  
803 display normal weight. **C.** RTP801 KO mice exhibit decreased brain weight. Whole brain  
804 weight was measured in 2-months-old animals. **D.** Brain sections of WT and KO mice were  
805 subjected to Nissl staining to visualize cell somas. Representative images of motor cortex  
806 (CTX), hippocampus (HIP) and striatum (STR) for both genotypes are shown. *Scale bar,*  
807 *250 $\mu$ m.* Motor cortex thickness (**E**) and LV cell density (**F**) were quantified in Nissl-stained  
808 sections. **G.** RTP801 total knockout mice show decreased spine density in motor cortex  
809 layer V. Spine density was quantified in 30 dendrites/animal, 50% apical and 50% basal, in 5  
810 WT and 5 KO animals. *Scale bar,* 10  $\mu$ m. **H.** Image of a brain sagittal slice on the MEA  
811 (magnification). Recordings from the selected electrodes (in red), located on LV, were  
812 analyzed. Motor cortex layers I-VI and *corpus callosum* (CC) are indicated. *Scale bar,* 600  
813  $\mu$ m. **I.** Spontaneous activity by MEA: Illustrative long time-scale (90 min) spike rasters of  
814 recorded LV motor cortex spontaneous activity from WT (4 males and 3 females) and

815 RTP801 KO (4 males and 4 females) mouse brain slices (1 slice per animal); the horizontal  
816 lines above each raster define bursts. Graphs show quantification of spike rate (**I.1**), burst  
817 rate (**I.2**), and the percent of spikes that form bursts (**I.3**) of field spontaneous activity  
818 recorded by MEA. Data in all graphs are presented as mean  $\pm$  SEM. \*  $P < 0.05$ , \*\*\* $P < 0.001$ ;  
819 two-tailed Student t-test *versus* WT (**C**, **F**). \* $P < 0.05$ ; Mann-Whitney test *versus* WT (**I.1-I.3**).  
820 Data in (**B**, **E**) was analyzed by two-way ANOVA.

821

822 **Figure 3. RTP801 contributes to motor learning and gait but does not alter general**  
823 **locomotor activity.** **A.** Schematic representation of the four different parameters measured  
824 in the footprint test: stride, sway, stance and limbs overlap (in blue, forelimb prints and, in  
825 red, hindlimb prints). **B.** Representative examples of footprint tracking from both genotypes.  
826 Graphs on the right show hindlimb lengths for stride, sway, stance and limbs overlap. Data is  
827 represented as mean  $\pm$  SEM and was analyzed with two-tailed Student's t-test. \*  $P < 0.05$ , \*\*  
828  $P < 0.01$ , \*\*\*  $P < 0.001$  *versus* WT group. N = 13 WT (8 males + 5 females) and 12 KO (4  
829 males + 8 females). **C.** Representative tracking of mice activity recorded for 10 minutes in an  
830 open field test. Graphs on the right show total distance traveled in the whole arena (blue),  
831 distance traveled in the center (red) and percentage of time spent in the center. Measures  
832 are shown as mean  $\pm$  SEM. There are no statistically significant differences according to the  
833 Student's t-tests performed. N = 18 WT (6 males + 12 females) and 17 KO (7 males + 10  
834 females). **D.** WT and RTP801 KO mice were subjected to the accelerating rotarod test and  
835 the time spent on it was evaluated for three days, four trials per day. Data is represented as  
836 mean  $\pm$  SEM and was analyzed by two-way ANOVA followed by Bonferroni's multiple  
837 comparisons test for *post hoc* analyses. Genotype effect: \*\*  $P < 0.01$ . Multiple comparisons: \*  
838  $P < 0.05$ , \*\*  $P < 0.01$ , \*\*\*  $P < 0.001$  *versus* WT group in each trial. N = 31 WT (14 males + 17  
839 females) and 30 KO (12 males + 18 females).

840

841 **Figure 4. RTP801 modulates dendritic spine density and morphology of pyramidal**  
842 **neurons in M1 in motor-trained animals.** One week after the accelerating rotarod test, WT

843 and RTP801 KO mice were culled and their brains were impregnated with Golgi-Cox  
844 staining prior to analyze changes in spine density. **A, B. Loss of RTP801 expression**  
845 **decreases spine density of pyramidal neurons from M1.** Spine density was quantified  
846 combining both apical and basal dendrites from M1 LV pyramidal neurons. **A, C.**  
847 **Abrogation of RTP801 expression affects specifically basal dendrites of pyramidal**  
848 **neurons in M1.** Spine density was assessed in apical and basal dendrites. Each bar of the  
849 graphs represents mean  $\pm$  SEM of at least 30 dendrites per animal (N= 8 WT and 5 KO),  
850 approximately 50% apical and 50% basal. **A, D. Loss of RTP801 expression does not**  
851 **affect spine density in the striatum.** Spine density was also analyzed in striatal MSNs.  
852 Data in the graph represent mean  $\pm$  SEM of at least 30 dendrites per animal (N= 8 WT and 5  
853 KO). Statistical analyses in a were performed with Mann-Whitney test, \*\* $P < 0.01$  vs. WT, and  
854 by Two-tailed Student's t-test in c-d; \*\*  $P < 0.01$  versus WT. Cortical layers (I, II/III, V, VI),  
855 *corpus callosum* (CC) and striatum (STR) are depicted in **A**. Representative WT and KO  
856 dendrites from primary motor cortex and striatum are shown (**B, D**). *Scale bar*, 10  $\mu$ m.

857

858 **Figure 5. RTP801 modulates spine morphology of pyramidal neurons in the motor**  
859 **cortex of trained animals.** Golgi-stained brains were processed and spine morphology of  
860 pyramidal neurons from M1 layer V were analyzed. Schematic representations show the  
861 spine morphologies considered in this study. **A.** RTP801 KO mice show reduced  
862 percentages of branched spines but increased percentage of filopodia spines in layer V  
863 neurons. Graphs show the percentage of each morphological type of dendritic spines *versus*  
864 total number of spines analyzed. Percentage of apical and basal thin (**B.1**) and mushroom  
865 (**C.1**) spines *versus* total number of spines with head. Spine density measures are  
866 represented as mean  $\pm$  SEM of 50 dendrites per genotype (5 animals per genotype, 5 basal  
867 and 5 apical dendrites per animal). Apical and basal spines were analyzed separately. Data  
868 in **A, B.1** and **C.1** was analyzed with two-tailed Student's t-test, \*  $P < 0.05$ , \*\*  $P < 0.01$  *versus*  
869 WT. Cumulative probability of apical and basal spine head area in thin (**B.2**) and mushroom  
870 (**C.2**). Distributions were compared with the Kolmogorov–Smirnov test. Apical and basal

871 spines were analyzed separately. 5 animals/genotype were analyzed, 5 apical and 5 basal  
872 dendrites per animal. Spine head area from basal mushroom spines shows significant  
873 differences between genotypes,  $D=0.2747$ ,  $P=0.0021$ .

874

875 **Figure 6. Synaptic contacts show structural differences between WT and RTP801 KO**  
876 **animals in the motor cortex after motor skill training.** Motor cortex lower layers were  
877 analyzed by TEM. **A. Postsynaptic area is increased in RTP801 KO mice synaptic**  
878 **contacts. B. Postsynaptic density (PSD) area, length and thickness are increased in**  
879 **RTP801 KO mice synaptic contacts.** Histograms show mean  $\pm$  SEM of the different  
880 measures analyzed relative to control mean. Images show a representative PSD for each  
881 genotype. **C. Increased presence of mitochondria in RTP801 KO synaptic contacts.**  
882 Graphs show the percentage of mitochondria found in synaptic contacts (either in the pre- or  
883 postsynaptic compartment) and in the presynapses or postsynapses separately. Data is  
884 represented as mean percentage  $\pm$  SEM. Images show representative contacts where a  
885 mitochondrion (M) is present in either the presynapse (PRE) or postsynapse (POST). All  
886 histograms represent data from 45-50 images per animal, four animals per genotype. Data  
887 in a-c represent data relative to WT mean. Data was analyzed with Mann-Whitney test. \*  $P <$   
888  $0.05$ , \*\*  $P < 0.01$ , \*\*\*  $P < 0.001$  versus WT control. For all electron micrographs, Scale bar,  
889 250 nm.

890

891 **Figure 7. RTP801 modulates synaptic composition in the cortex from motor-trained**  
892 **mice. A-C. Lack of RTP801 expression decreases PSD-95 levels but increases AMPAR**  
893 **subunit GluA1 levels in synaptosomes.** Levels of postsynaptic proteins were analyzed in  
894 2-months-old WT and RTP801 KO animals. Crude synaptosomal fractions were obtained  
895 from cortical brain lysates and analyzed by western blotting. Representative images of PSD-  
896 95 (A), GluA1, GluA2, Stargazin (B), GluN2B (C) and actin are shown. **D. Lack of RTP801**  
897 **expression increases TrkB receptor levels in motor cortex homogenates.** In the same  
898 WT and KO samples levels of full length TrkB was assessed by western blotting from

899 homogenates. Representative images of TrkB and actin are shown. Densitometric measures  
900 (mean  $\pm$  SEM) of total levels of PSD-95 and TrkB were relativized against actin and synaptic  
901 levels of the different proteins in the synaptic fraction were relativized against synaptic  
902 marker PSD-95. **E-H.** M1 LV excitatory postsynaptic characterization in 2-months old WT  
903 and RTP801 KO mice after performing behavioral motor tasks. **E.** Quantification of the  
904 number of PSD-95, GluA1 and PSD-95/GluA1 positive puncta per field. **F-G.** Quantification  
905 of PSD-95 and GluA1 puncta mean area (**F**) and intensity (**G**). Representative confocal  
906 images of a double immunofluorescence of PSD-95 and AMPAR subunit GluA1 in the motor  
907 cortex layer 5. *Scale bar*, 100  $\mu$ m. All values appear as mean  $\pm$  SEM and were analyzed  
908 with two-tailed Student's t-test *versus* WT \*  $P < 0.05$  and \*\* $P < 0.01$ .

909

910 **Figure 8. RTP801 KO mice show improved motor learning skills accompanied by**  
911 **functional and structural differences at a synaptic level.** In comparison to WT mice,  
912 RTP801 KO mice show decreased spine density in M1 LV neurons together with an  
913 increase in the proportion of filopodia and mushroom-like dendritic spines. At a structural  
914 level, we found increased post-synaptic areas and PSD size and increased presence of  
915 mitochondria at the synapse in KO primary motor cortex LV together with increased levels of  
916 synaptic GluA1 AMPAR subunit.

917

918 **EXPANDED VIEW FIGURE LEGENDS:**

919

920 **Expanded view figure 1. RTP801 is present in the postsynaptic compartment and its**  
921 **overexpression alters synaptic transmission and the levels of synaptic proteins in**  
922 **primary cultured hippocampal neurons. A. RTP801 protein colocalizes with**  
923 **postsynaptic marker PSD-95.** Cells were fixed at DIV 21 and endogenous RTP801 (green)  
924 and PSD-95 (red) were analyzed by immunofluorescence. White arrows designate PSD-95  
925 and RTP801 colocalizations. *Scale bar*, 5  $\mu$ m. **B. RTP801 seldom colocalizes with**

926 **presynaptic protein SV2A.** Cells were fixed at DIV 17 and RTP801 (green) and SV2A (red)  
927 proteins were analyzed by immunofluorescence. White arrows point SV2A positive  
928 presynaptic *puncta*, which does not colocalize with RTP801. *Scale bar*, 5  $\mu$ m. **C, D. Ectopic**  
929 **RTP801 reduces the intensity of PSD-95 and GluA1 at the synaptic contacts.** Neurons  
930 were transfected with a vector expressing RTP801 tagged with eGFP (eGFP-RTP801) or  
931 with an eGFP control vector (eGFP). Two days following transfection, at DIV 15, neurons  
932 were fixed and subjected to immunofluorescent staining against eGFP (green) and PSD-95  
933 (**C**) or GluA1 (**D**) (both in red). Images show a representative staining for each protein.  
934 Graphs show immunofluorescent integrated intensity and synaptic accumulation density,  
935 represented as mean  $\pm$  SEM from the analysis of at least 12 neurons per group. Data in c  
936 was analyzed with two-tailed Student's t-test. Data in d was analyzed with Mann-Whitney  
937 test. \*  $P < 0.05$ , \*\*  $P < 0.01$  vs. eGFP. *Scale bar*, 10  $\mu$ m. **F. Ectopic RTP801 attenuates**  
938 **postsynaptic excitatory transmission.** Primary cultures of hippocampal neurons from rat  
939 E.18 embryos were transfected at DIV 13 with a control vector (eGFP) or a vector  
940 expressing RTP801 protein fused with GFP (eGFP-RTP801). Two days later mEPSC were  
941 recorded through patch-clamp. Quantitative analysis of mEPSCs amplitude and frequency is  
942 represented in the graphics as mean  $\pm$  SEM from the recordings performed in at least 8  
943 transfected neurons per condition. Data was analyzed with Student's t-test, \*  $P < 0.01$  vs.  
944 eGFP.

945

946 **Expanded view figure 2. Multielectrode array analysis of M1 LV spontaneous activity**  
947 **on mouse slices. A.** We found no sex effects in the spike rate differences between WT and  
948 RTP801 KO animals (Two-way ANOVA;  $F_{(1,11)} = 5.137$ ;  $P = 0.045$ ;  $F_{(1,11)} = 0.374$ ; for the  
949 genotype effect;  $P = 0.553$  for the sex effect,  $F_{(1,11)} = 1.627$ ,  $P = 0.228$  for the sex/genotype  
950 interaction). When we analyzed the spike-train patterns in WT and KO motor cortex slices  
951 we found no differences in mean burst duration (**B**), inter-spike interval duration (ISI) inside  
952 the bursts (**C**), and spike frequency in the burst (**D**).

953

954 **Expanded view figure 3. A. RTP801 KO mice show hindlimb clasping.** Example of  
955 clasping reflex; 2-months-old RTP801 KO mice display their hindlimbs towards their  
956 abdomen when suspended by the tail. Graphical representation of clasping phenotype  
957 scored: 0 (no clasping), 1 (one hindlimb is retracted), 2 (both hindlimbs are partially  
958 retracted) and 3 (both hindlimbs totally retracted towards the abdomen). Measures are  
959 represented as mean  $\pm$  SEM and analyzed with two-way ANOVA (genotype effect, \*\*\*  $P <$   
960 0.001) followed by Bonferroni's multiple comparisons test for *post hoc* analyses, \*\*\*  $P <$   
961 0.001. **B. Gait abnormalities are found in both male and female RTP801 KO mice.**  
962 Graphics show hindlimb lengths for stride, sway, stance and limbs overlap. Data is  
963 represented as mean  $\pm$  SEM and was analyzed with two-way ANOVA followed by  
964 Bonferroni's multiple comparisons test for *post hoc* analyses. \*  $P <$  0.05, \*\*  $P <$  0.01, \*\*\*  $P <$   
965 0.001 *versus* same-gender WT group, N = 8 WT males, 5 WT females, 4 KO males and 8  
966 KO females. **C. Anxiety-like behavior analyses during open field test.** The assessment  
967 was performed for 10 minutes. Graphs show measures of self-grooming behavior, number of  
968 wall and vertical rearings and number of fecal pellets. Data is represented as mean  $\pm$  SEM  
969 and was analyzed with two-way ANOVA followed by Bonferroni's multiple comparisons test  
970 for *post hoc* analyses. \*\*\*  $P <$  0.001 *versus* same-gender WT group .N = 8 WT males, 5 WT  
971 females, 4 KO males and 8 KO females. **D. Both male and female RTP801 KO mice**  
972 **display the same tendency to perform better in the Accelerating Rotarod.** Time spent in  
973 the accelerating rotarod for three days, four trials per day, by RTP801 KO female and male  
974 mice. Data is represented as mean  $\pm$  SEM and was analyzed with two-way ANOVA. N = 14  
975 WT males + 17 WT females and 12 KO males + 18 KO females.

976

977 **Expanded view figure 4. Percentage of different types of spine morphology measured**  
978 **in apical and basal dendrites.** Graphs show the percentage of each morphological type of  
979 dendritic spines versus total number of spines. Measures are represented as mean  $\pm$  SEM



980 50 dendrites per genotype (5 animals per genotype, 5 basal and 5 apical dendrites per  
981 animal). Data was analyzed with two-tailed Student's t-test, \*  $P < 0.05$ .

982

983 **Expanded view figure 5. A-B.** There are no differences in the number of presynapses and  
984 postsynapses with more than one contact between WT and KO animals. Electron  
985 micrographs illustrate a presynapse (**A**) with two postsynaptic contacts and a postsynapse  
986 (**B**) with two presynaptic inputs. **C.** There are no differences in the percentage of  
987 postsynaptic compartments with spine apparatus (S. App) between genotypes. Image on the  
988 right show a perforated contact with a spine apparatus in the postsynapse. Data is  
989 represented as mean percentage  $\pm$  SEM. All histograms represent data from 45-50 images  
990 per animal, four animals per genotype. Data was analyzed with Student's t-test.

991

992



**FIGURE 1**

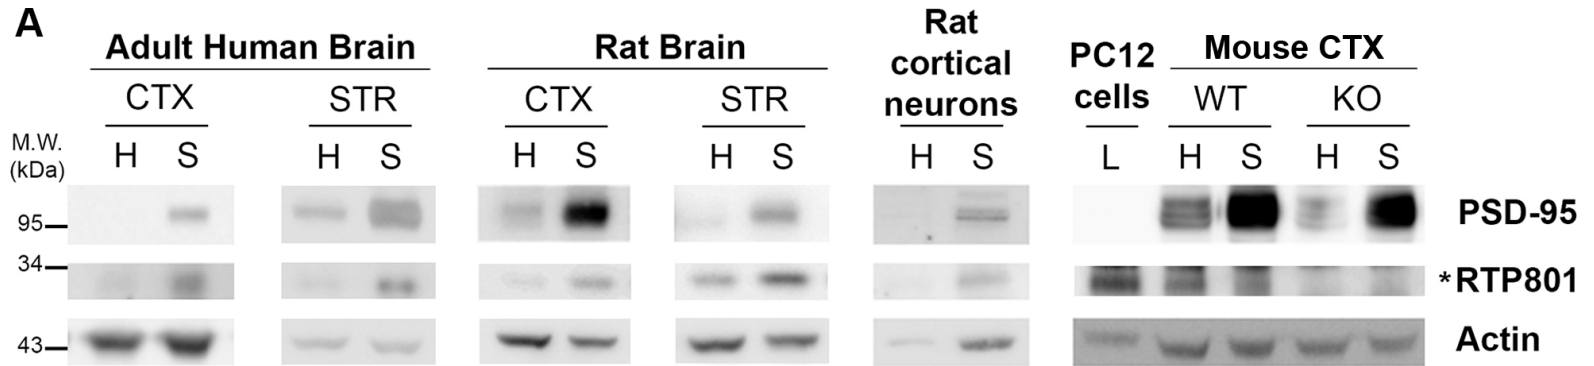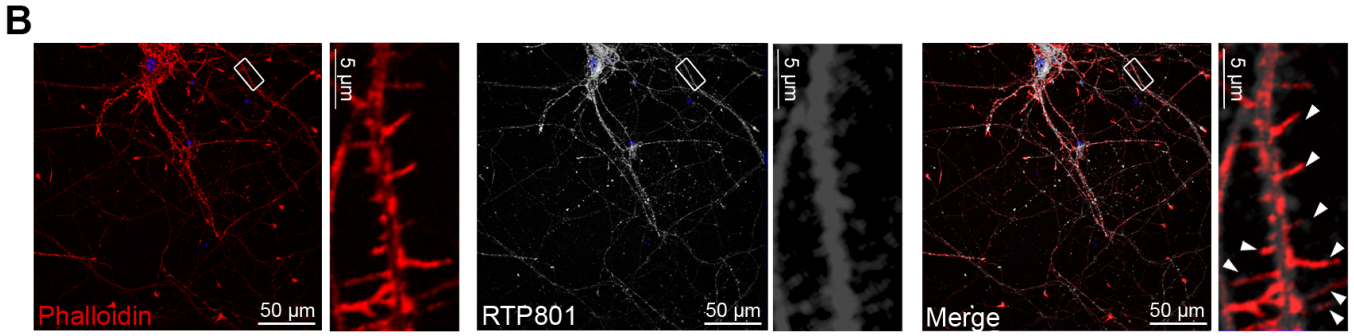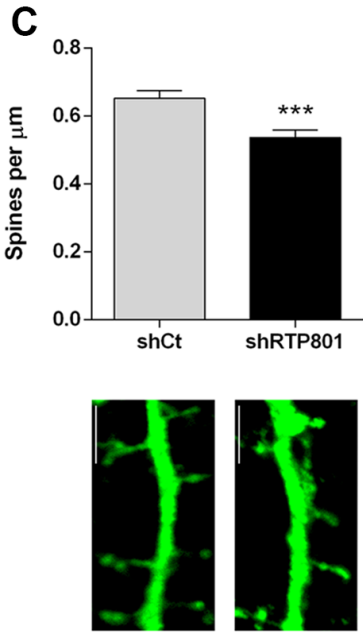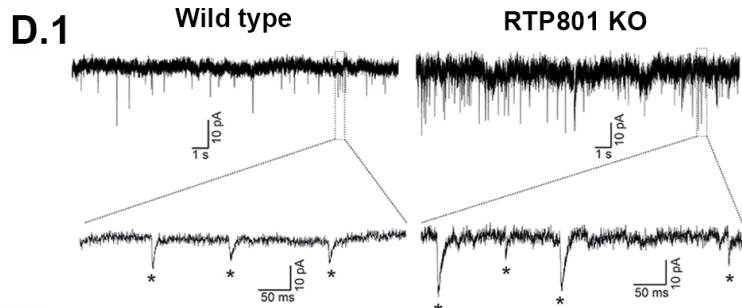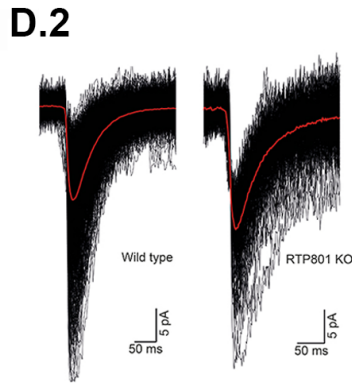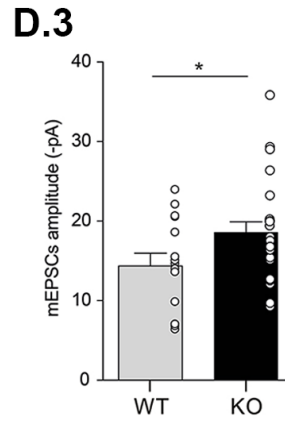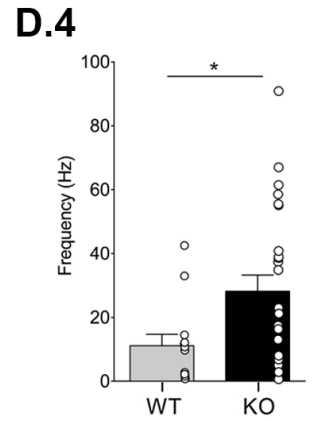

**FIGURE 2**

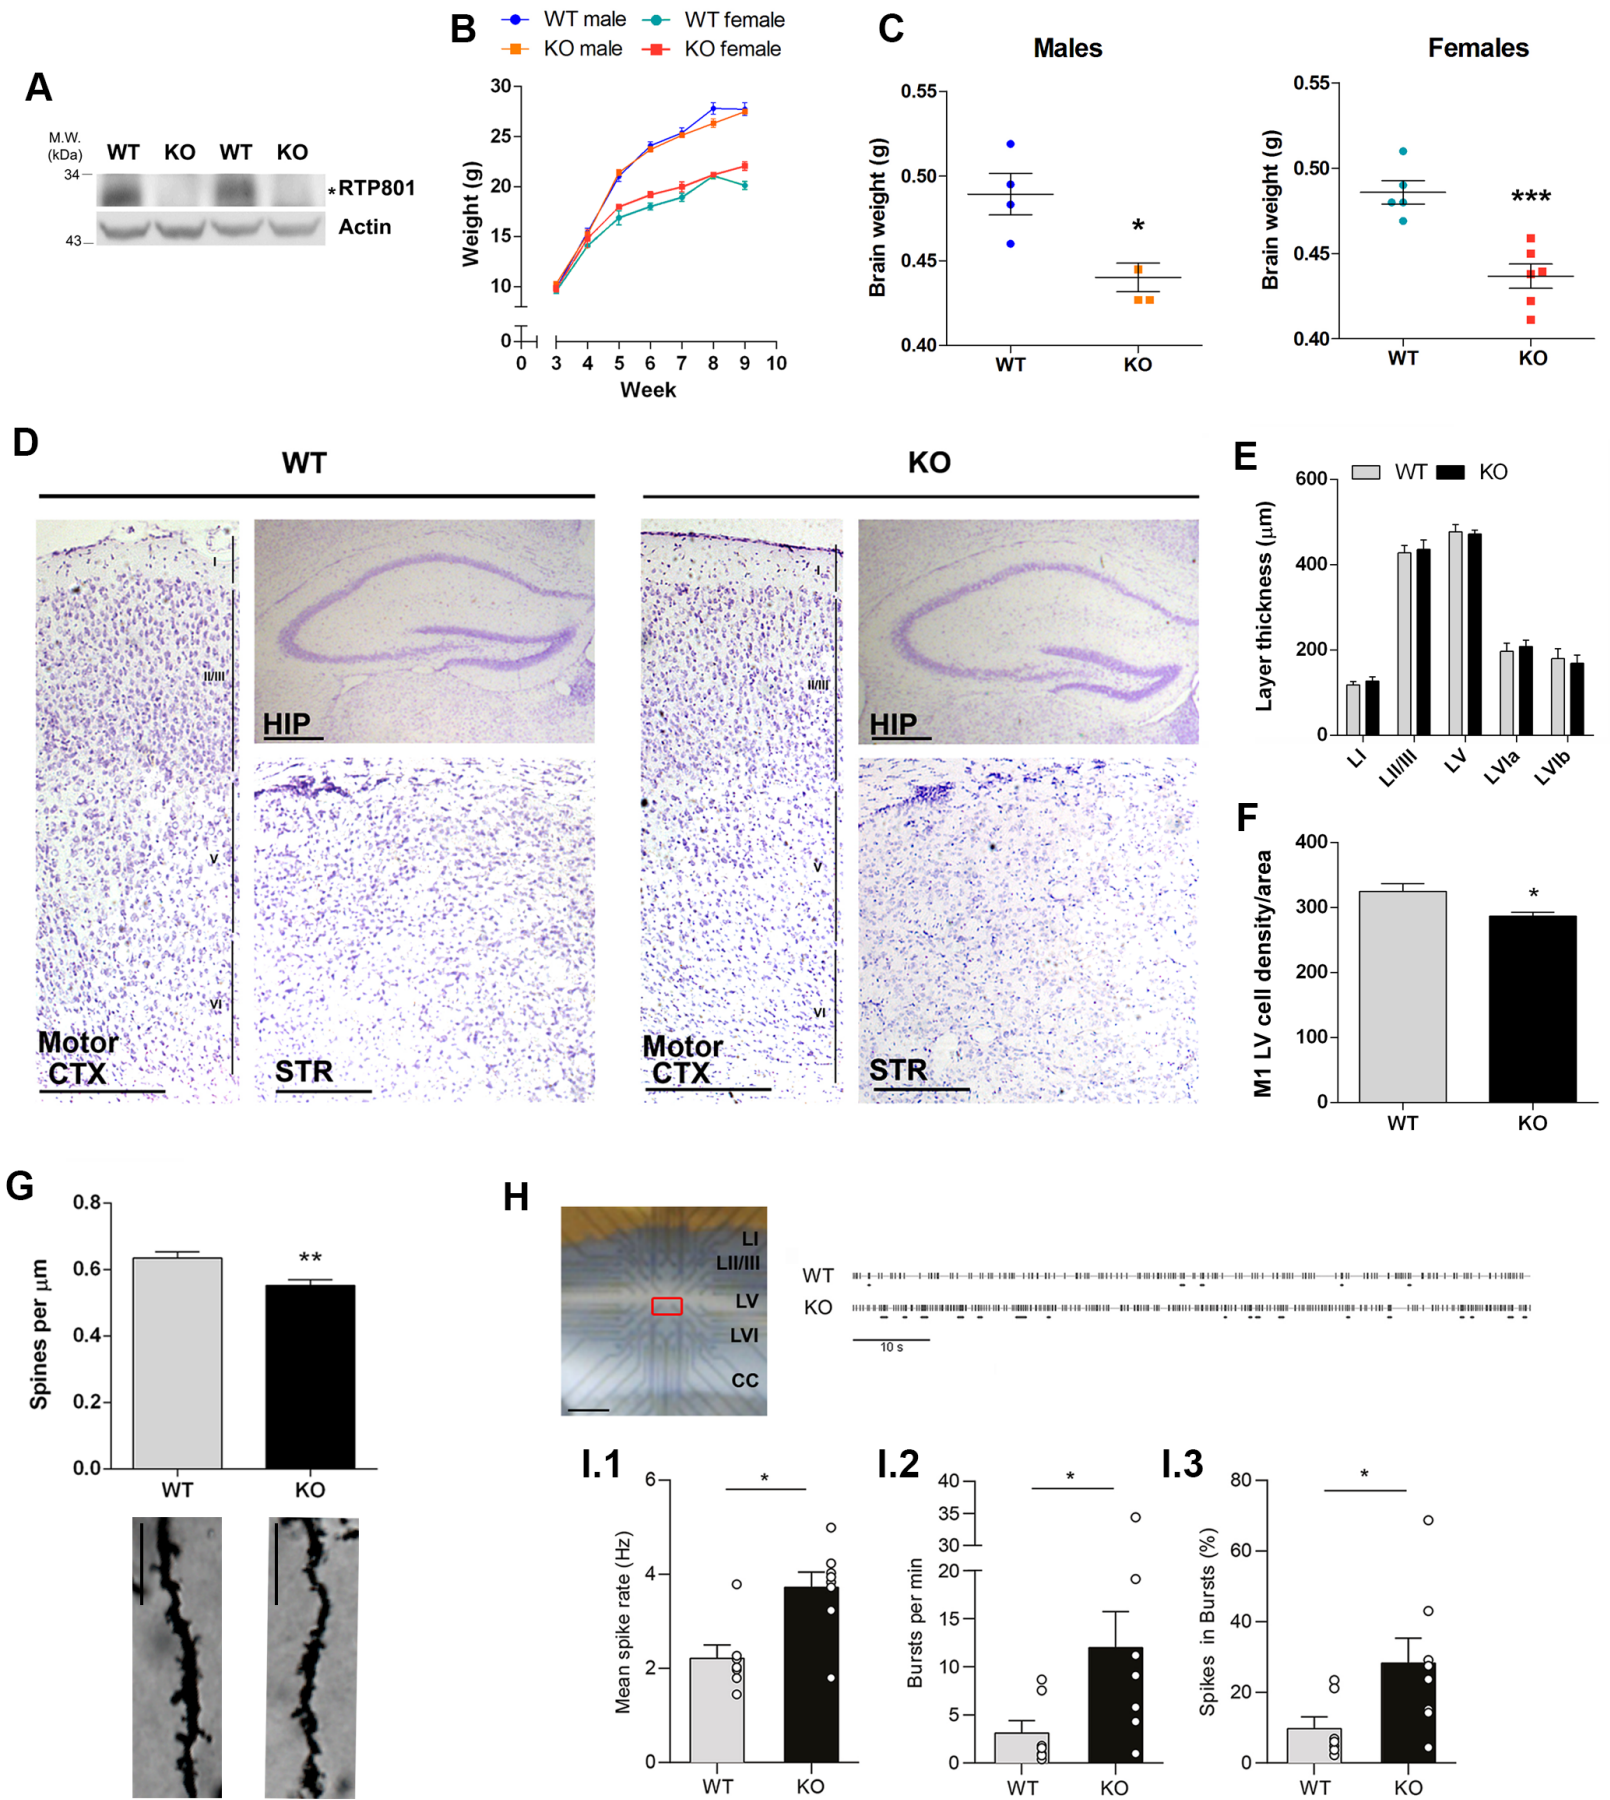

**FIGURE 3**

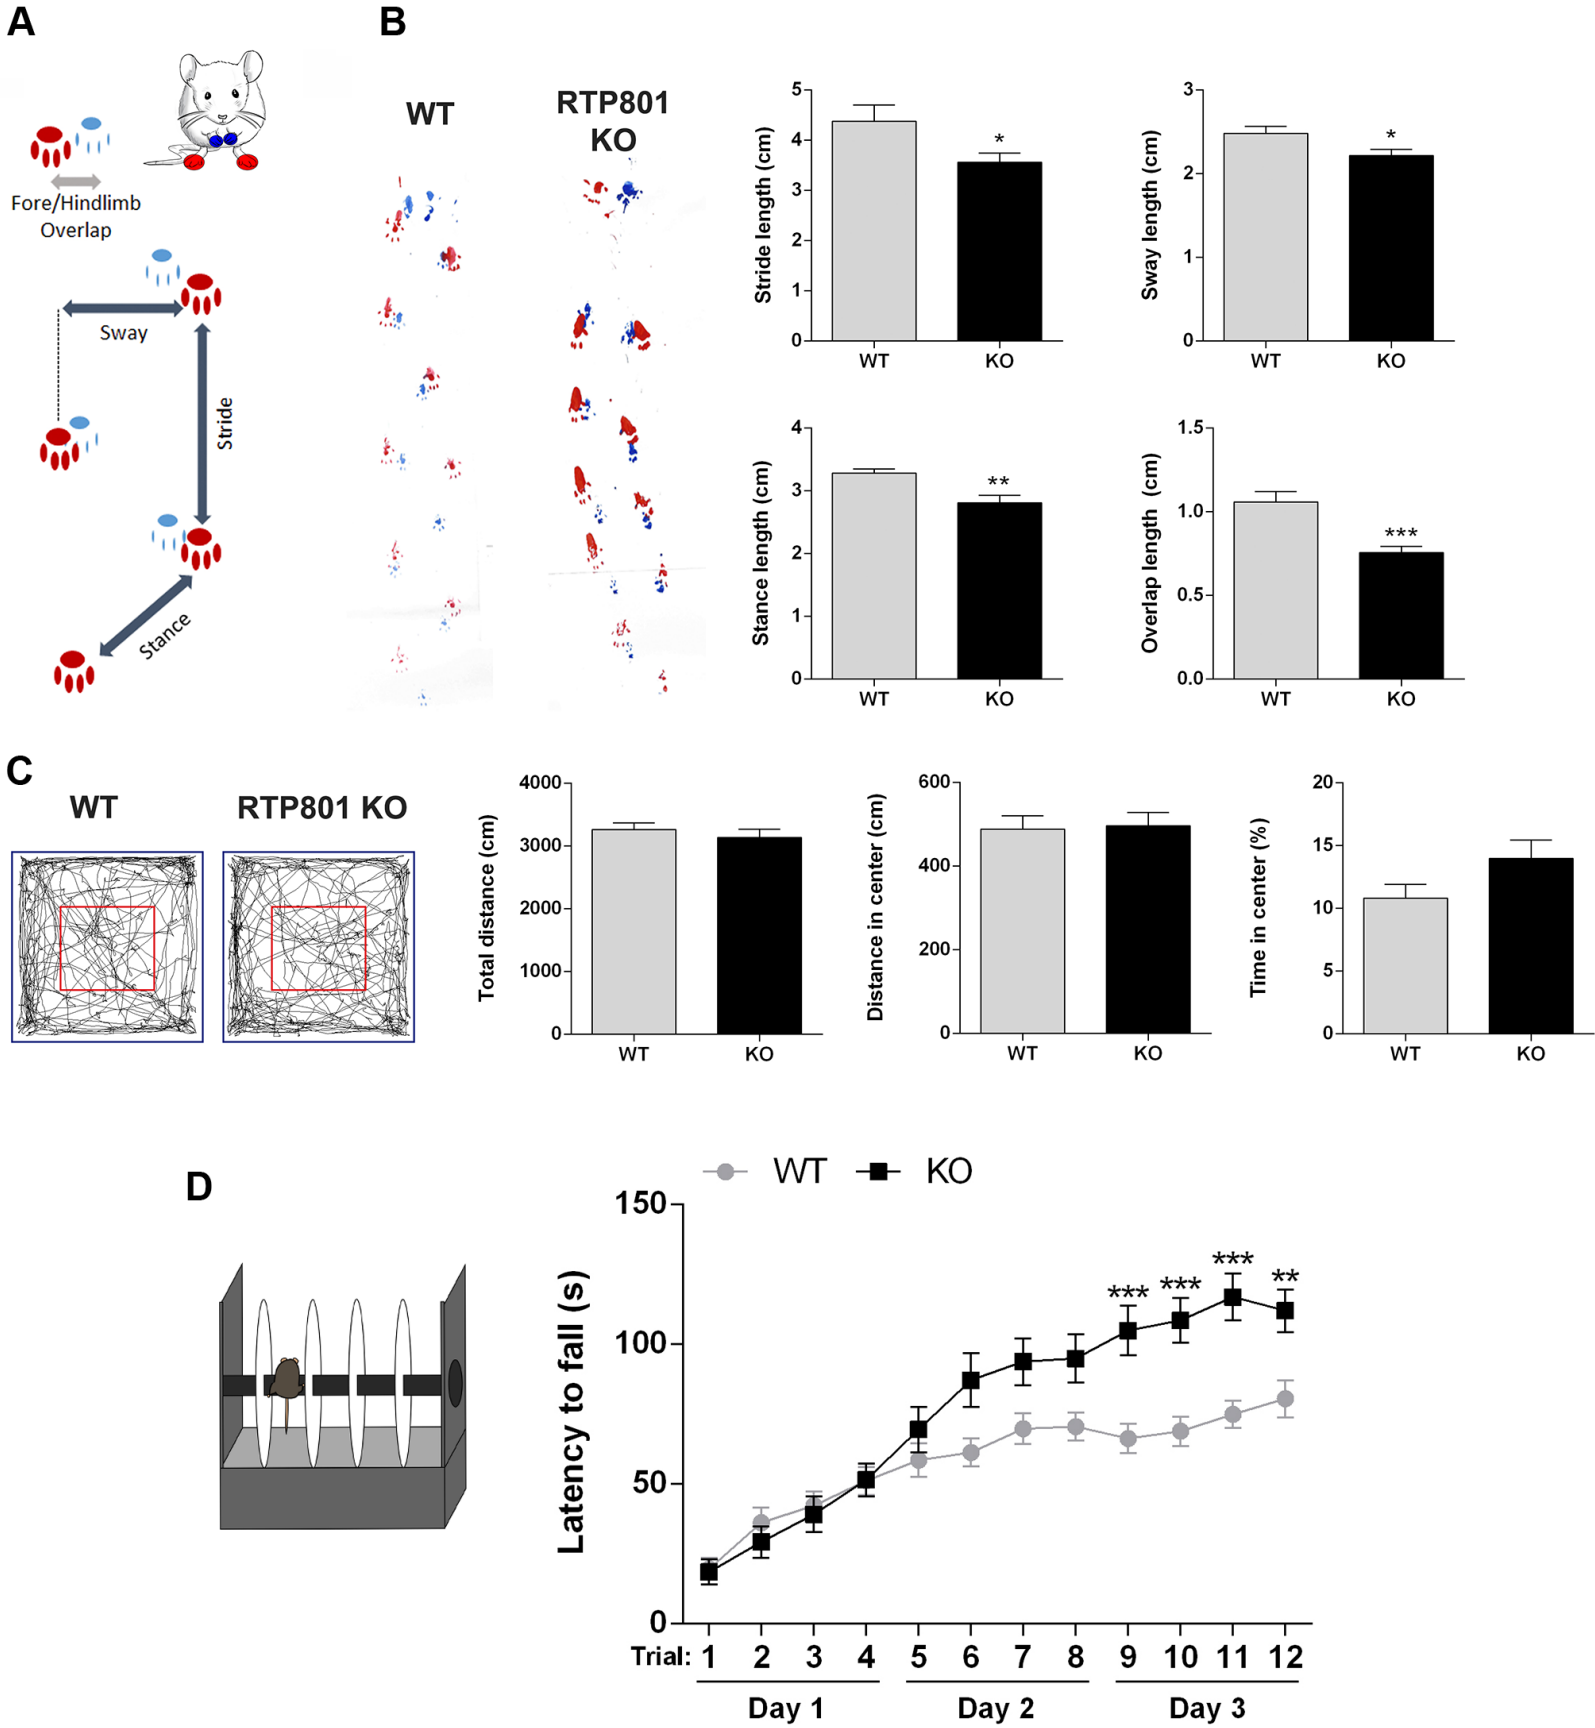

**FIGURE 4**

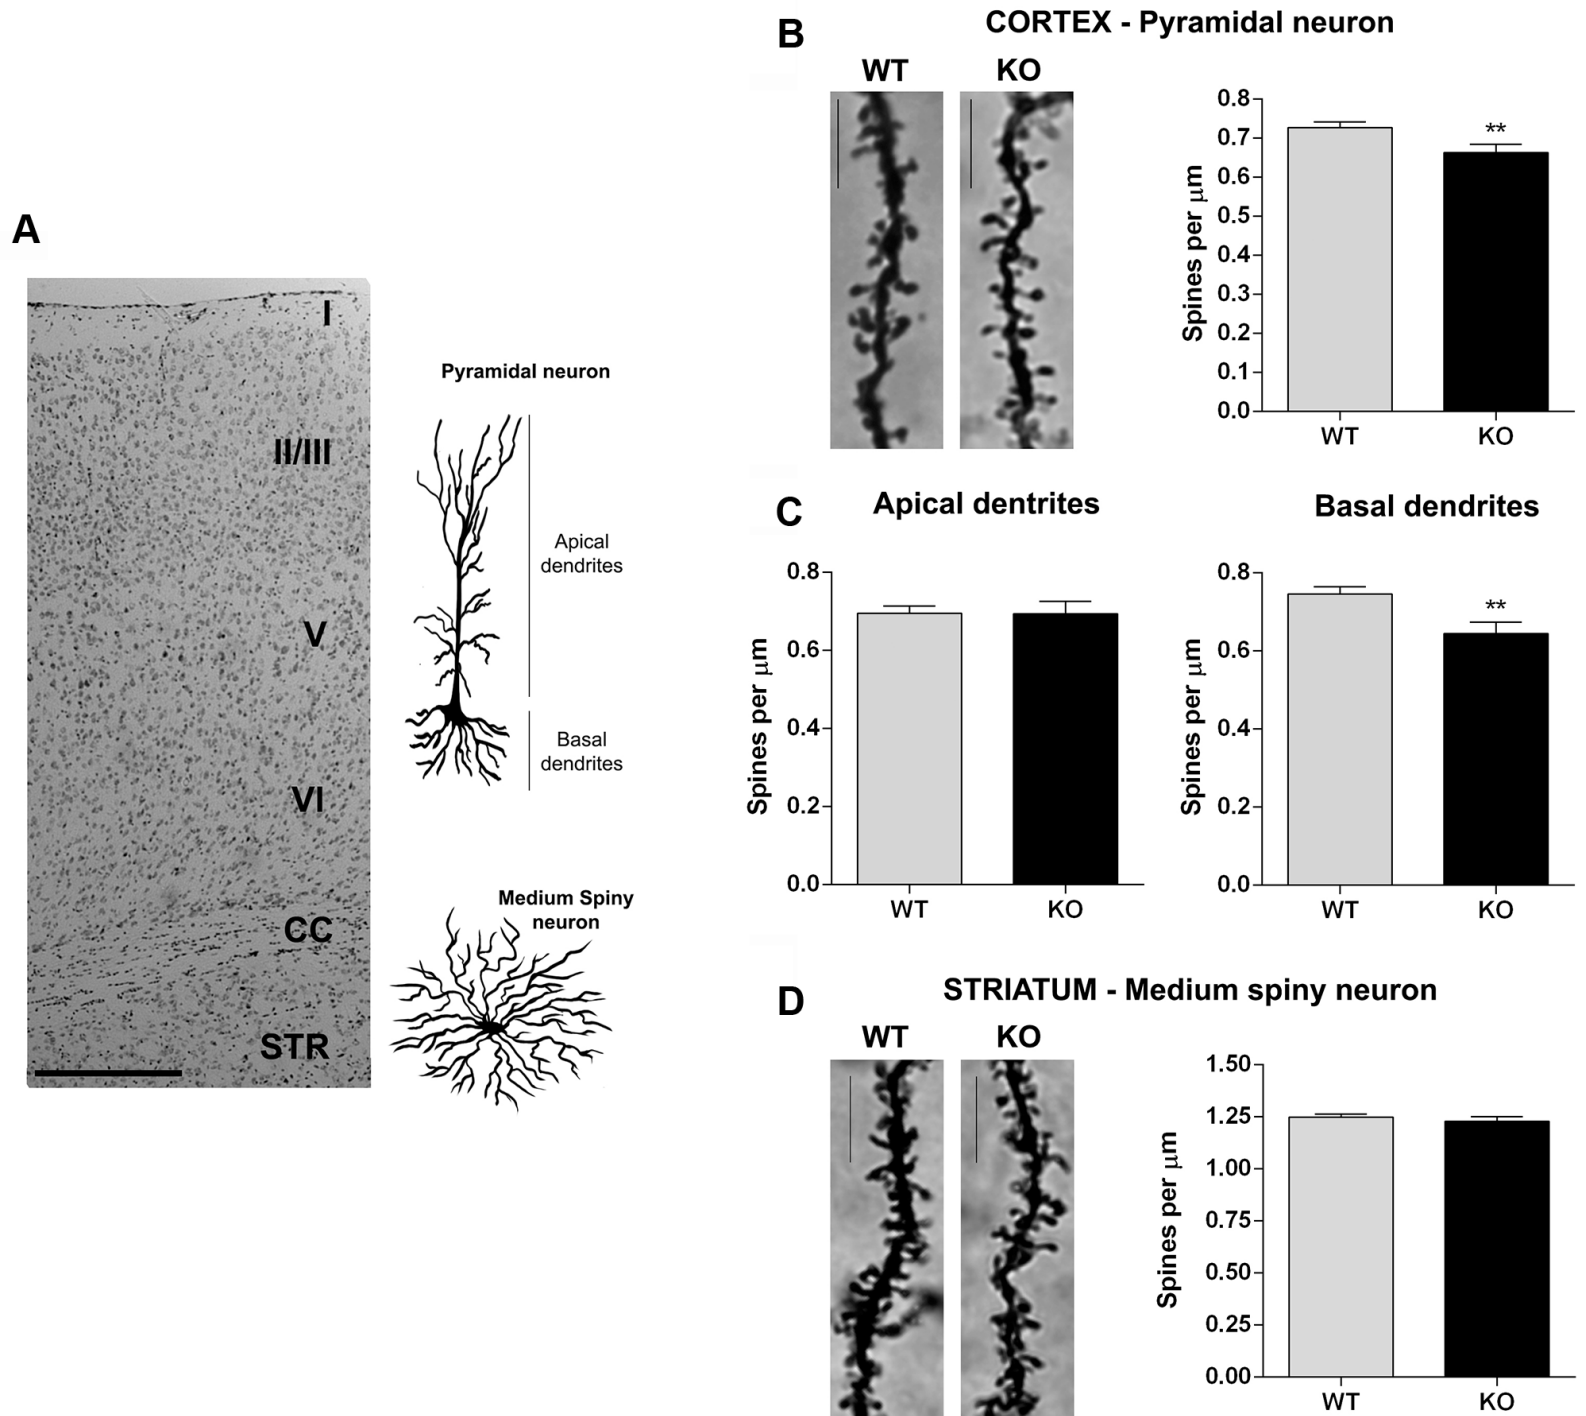

**FIGURE 5**

**A**

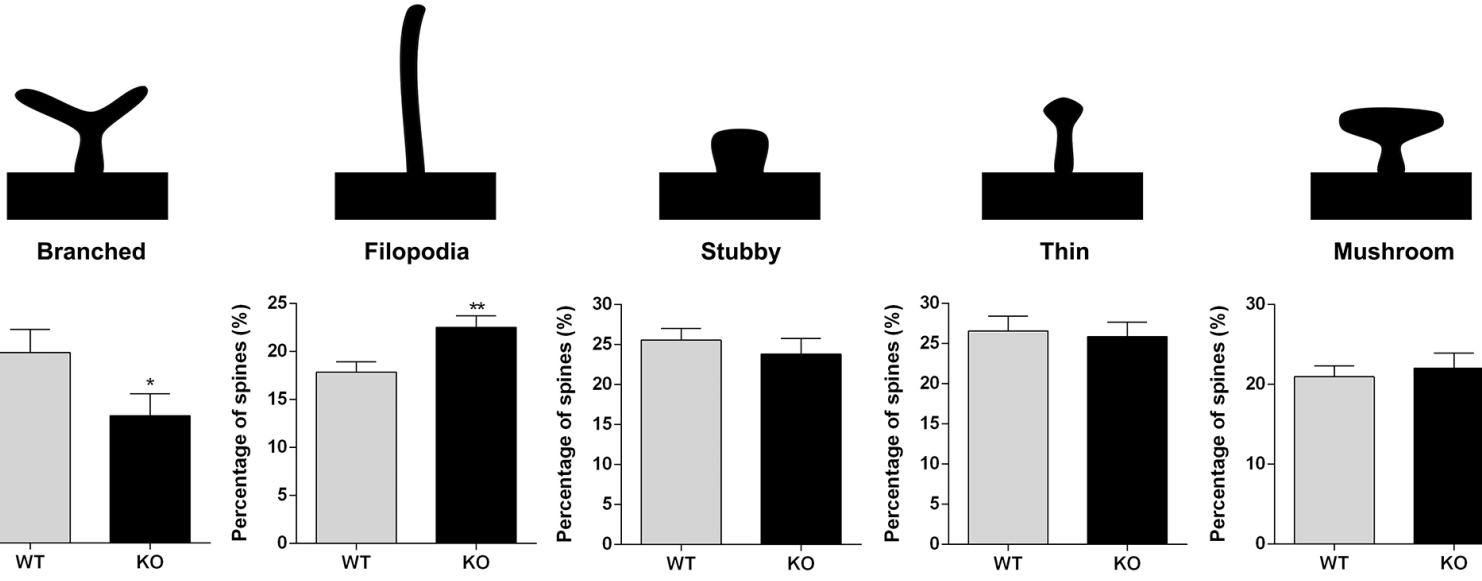

**B.1**

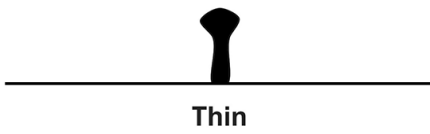

Thin

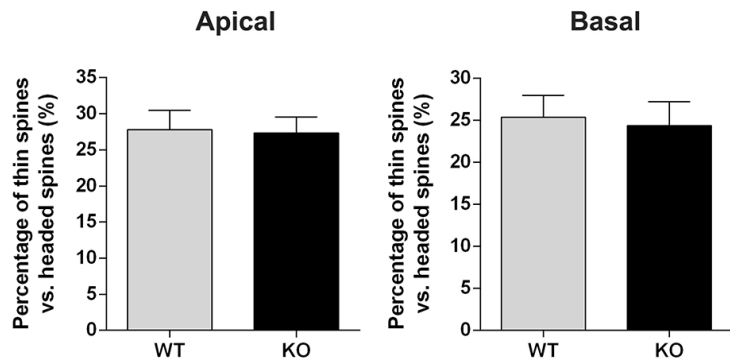

**C.1**

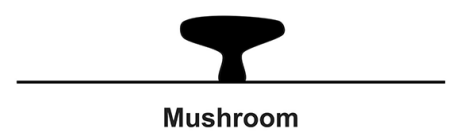

Mushroom

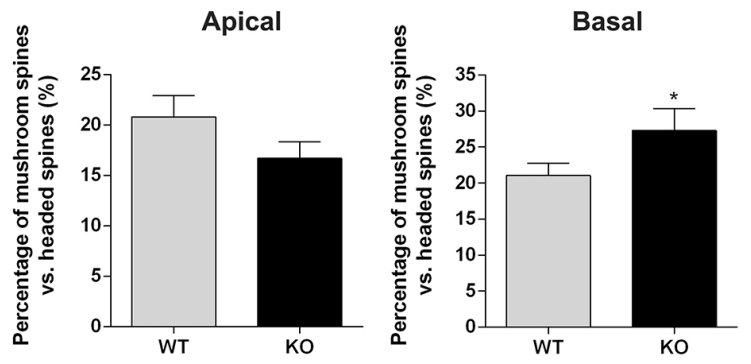

**B.2**

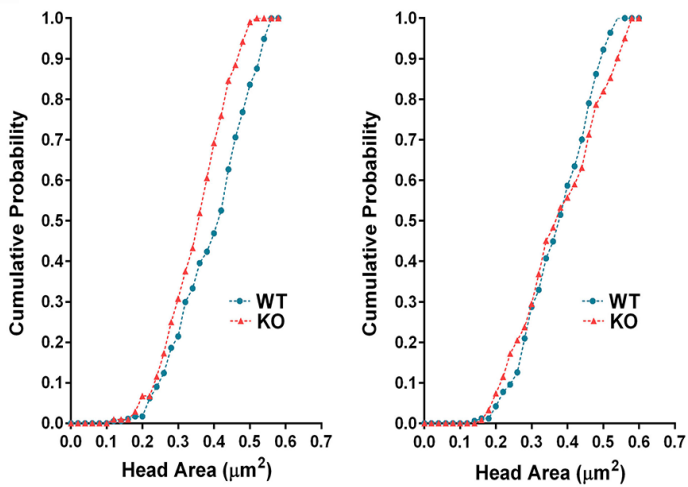

**C.2**

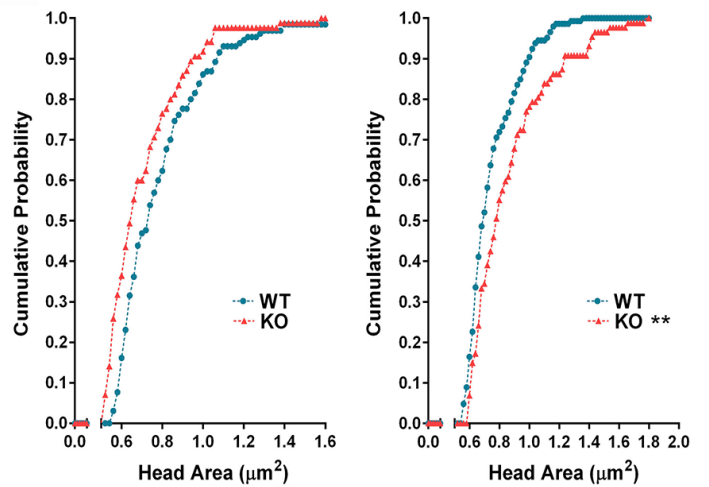



FIGURE 6

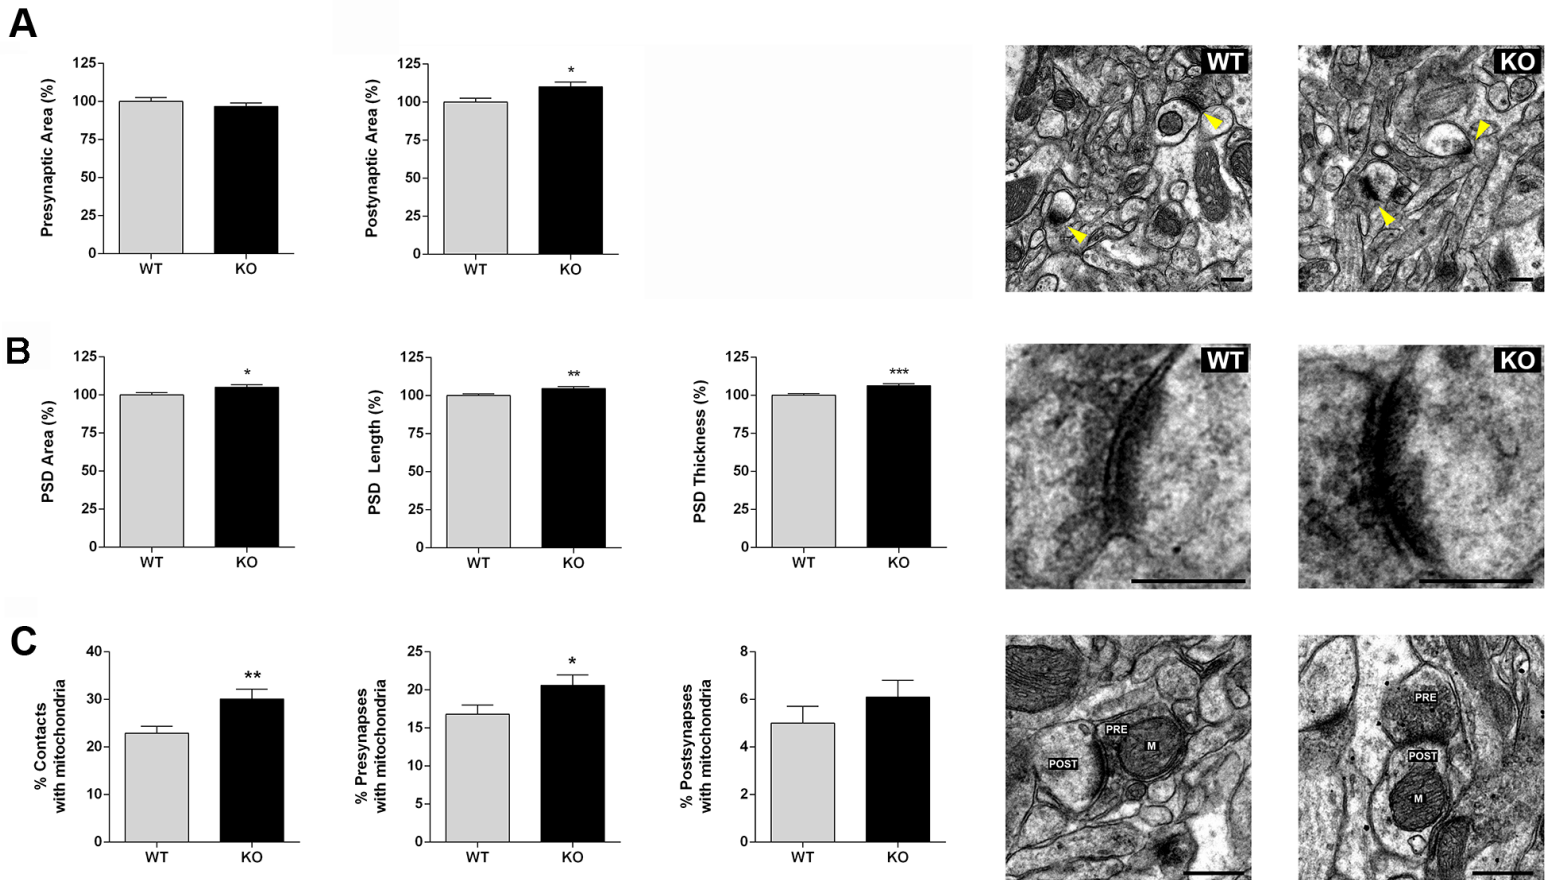

# FIGURE 7

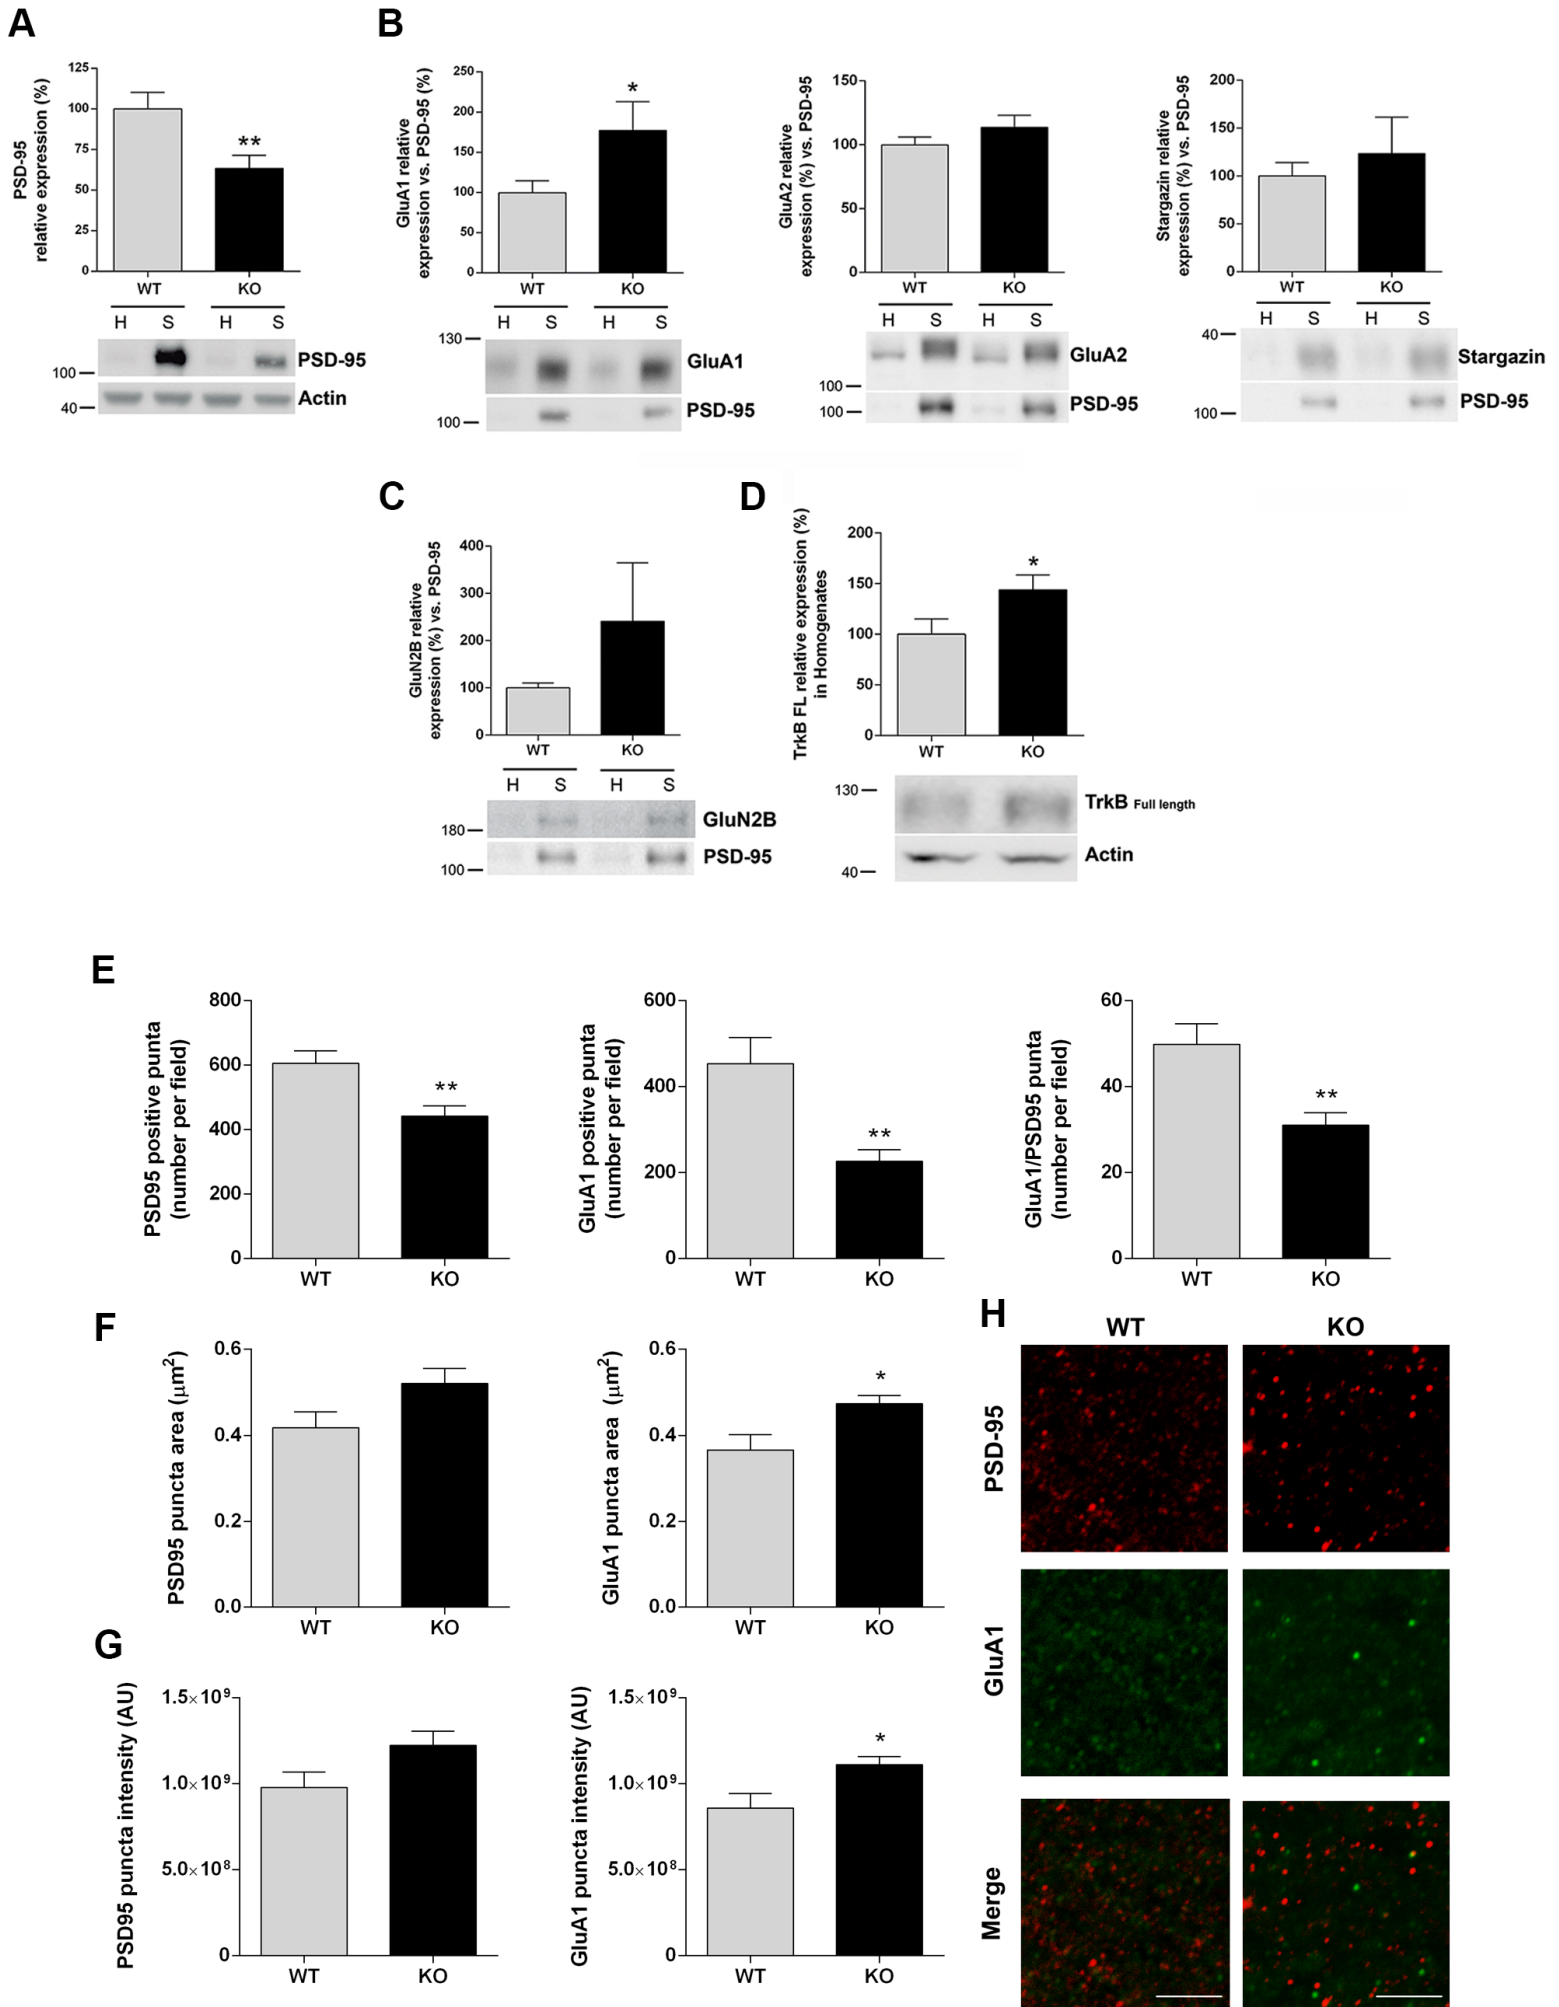



Motor CTX  
LV pyramidal neuron

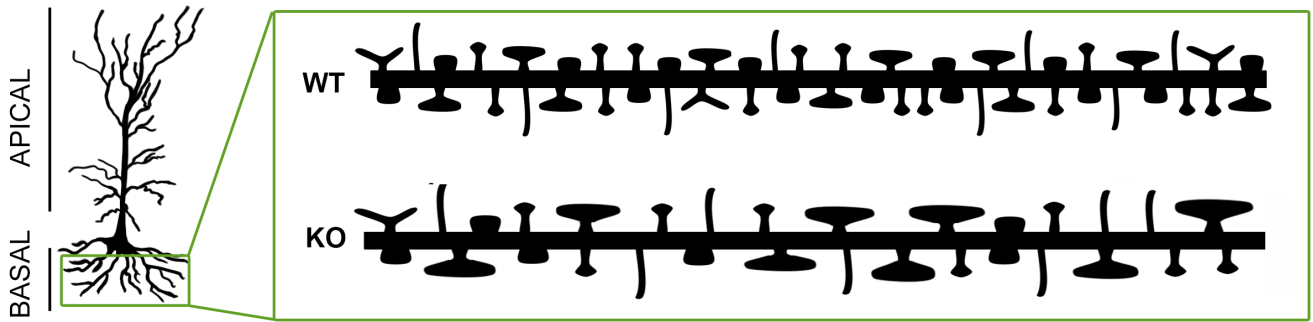

WT SYNAPSE

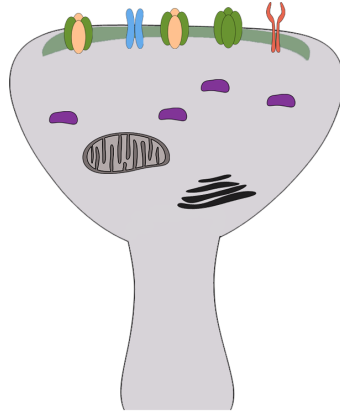

RTP801 KO SYNAPSE

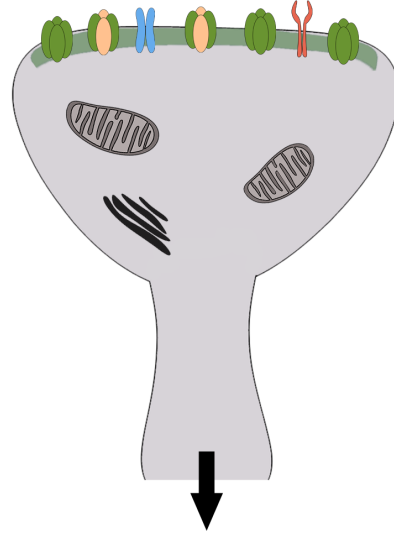

Improved motor learning skills  
Increased amplitude and frequency of excitatory currents

-  RTP801
-  NMDA
-  TrkB
-  Mitochondria
-  Spine Apparatus
-  AMPAR (GluA2-containing, CI)
-  AMPAR (GluA1-containing, CP)
