1 **RTP801 REGULATES MOTOR CORTEX SYNAPTIC TRANSMISSION AND**  
2 **LEARNING**

3

4 Abbreviated title: **RTP801 in motor learning**

5

6 **AUTHORS:** Pérez-Sisqués L<sup>1,2#</sup>, Martín-Flores N<sup>1,2#a</sup>, Masana M<sup>1,2,3,4</sup>, Solana J<sup>1,2</sup>, Llobet A<sup>1</sup>,  
7 Romani-Aumedes J<sup>1,2</sup>, Canal M<sup>1,2§</sup>, Campoy G<sup>1,2</sup>, García-García E.<sup>1,2,3,4</sup>, Sánchez-  
8 Fernández N<sup>1</sup>, Fernández-García S<sup>1,2,3,4</sup>, Gilbert JP<sup>5</sup>, Rodríguez MJ<sup>1,2,3,4</sup>, Man H-Y<sup>5</sup>,  
9 Feinstein E<sup>6</sup>, Williamson D<sup>7</sup>, Soto D<sup>1,2,3</sup>, Gasull X<sup>1,2,3</sup>, Alberch J<sup>1,2,3,4</sup> and Malagelada C<sup>1,2\*</sup>

10

11 <sup>1</sup> Department of Biomedicine, Faculty of Medicine, University of Barcelona, Catalonia, Spain

12 <sup>2</sup> Institut de Neurociències, University of Barcelona, 08036 Catalonia, Spain

13 <sup>3</sup> IDIBAPS- Institut d'Investigacions Biomèdiques August Pi i Sunyer, Barcelona, 08036  
14 Catalonia, Spain

15 <sup>4</sup> Centro de Investigación Biomédica en Red sobre Enfermedades Neurodegenerativas  
16 (CIBERNED), Barcelona, 08036 Catalonia, Spain

17 <sup>5</sup> Department of Biology, Pharmacology and Experimental Therapeutics, Boston University,  
18 Boston, MA, 02215USA

19 <sup>6</sup> Quark Pharmaceuticals, Fremont, CA, 94555 USA

20 <sup>7</sup> Kinesiology Program, School of Behavioral Sciences and Education, Penn State  
21 Harrisburg, Middletown, PA, 17057 USA

22 <sup>a</sup> Current affiliation: Department of Cell and Developmental Biology, University College  
23 London, London, WC1E 6BT, UK

24 <sup>§</sup> Current affiliation: HIPRA Headquarters, Amer (Girona) 17170, Catalonia, Spain

25 <sup>#</sup> These authors contributed equally to this work.

26

27 **\*Correspondence:** Cristina Malagelada, PhD. Unit of Biochemistry, Department de  
28 Biomedicine, Faculty of Medicine. Address: Casanova 143, north wing 3rd floor; Universitat  
29 de Barcelona, Barcelona 08036 Catalonia, (Spain) +34-934021919

30 E-mail: [cristina.malagelada@ub.edu](mailto:cristina.malagelada@ub.edu)

31 ORCID: 0000-0001-7185-436X

32

33

34 **KEY WORDS:** GluA1 / motor learning / mTOR / Plasticity / RTP801 /

35

36

37

38

39

40 **ABSTRACT:**

41

42 RTP801/REDD1 is a stress-regulated protein whose upregulation is necessary and sufficient  
43 to trigger neuronal death in *in vitro* and *in vivo* models of Parkinson's and Huntington's  
44 diseases and is up regulated in compromised neurons in human postmortem brains of both  
45 neurodegenerative disorders. Indeed, in both Parkinson's and Huntington's disease mouse  
46 models, RTP801 knockdown alleviates motor-learning deficits.

47 Here, we investigated the physiological role of RTP801 in neuronal plasticity. RTP801 is  
48 found in rat, mouse and human synapses. The absence of RTP801 enhanced excitatory  
49 synaptic transmission in both neuronal cultures and brain slices from RTP801 knock-out  
50 (KO) mice. Indeed, RTP801 KO mice showed improved motor learning, which correlated  
51 with lower spine density but increased basal filopodia and mushroom spines in the motor  
52 cortex layer V. This paralleled with higher levels of synaptosomal GluA1 and TrkB receptors  
53 in homogenates derived from KO mice motor cortex, proteins that are associated with  
54 synaptic strengthening. Altogether, these results indicate that RTP801 has an important role  
55 modulating neuronal plasticity in motor learning.

56

57

58 **INTRODUCTION:**

59

60 Synaptic plasticity is the ability to fine tune neuronal connectivity and dynamics upon  
61 demand, for example in situations in which individuals have to adjust movements in  
62 challenging environments. This process is known as motor learning and involves the  
63 acquisition of a novel motor skill that, once learned, persists after training period ends  
64 (Peters *et al*, 2017; Sanes & Donoghue, 2000; Xu *et al*, 2009).

65

66 The central hub for motor learning is the motor cortex, an interconnected structure with other  
67 brain regions such as the striatum, the thalamus, brainstem or the spinal cord (reviewed in

68 (Shepherd, 2013; Shepherd & Huganir, 2007)). The complex process of acquiring new motor  
69 skills induces synaptic plasticity in the motor cortex and requires dendritic spine formation,  
70 consolidation and/or elimination, all leading to a necessary synaptic remodeling and  
71 strengthening (Peters *et al*, 2017; Sanes & Donoghue, 2000; Fu *et al*, 2012; Xu *et al*, 2009).  
72 Pyramidal neurons from the motor cortex and striatal medium spiny neurons (MSNs)  
73 predominantly undergo plastic changes along motor learning (Costa *et al*, 2004; Tjia *et al*,  
74 2017). Regarding the motor cortex, projection pyramidal neurons from Layer V (LV) are the  
75 main excitatory input to the striatum involved in the corticostriatal pathway (Costa *et al*,  
76 2004; Shepherd & Huganir, 2007; Hintiryan *et al*, 2016; Anderson *et al*, 2010). These plastic  
77 changes leading to motor learning involve, at least, increased levels of  $\alpha$ -amino-3-hydroxy-5-  
78 methyl-4-isoxazolepropionic acid receptors (AMPA) at dendritic spines (Kida *et al*, 2016;  
79 Roth *et al*, 2020) . However, the mechanisms by which these events are regulated are not  
80 yet clearly elucidated.

81

82 In many neurodegenerative diseases, along with neurological and psychiatric symptoms,  
83 motor dysfunction is a hallmark of disease progression. Among these disorders, we find  
84 Parkinson's disease (PD), Huntington's disease (HD), or amyotrophic lateral sclerosis,  
85 (Shepherd, 2013). Motor dysfunction is due, in part, to an impairment in the synaptic  
86 plasticity of the circuitries that control movement by interconnecting motor cortex and basal  
87 ganglia and the thalamus, and also the cerebellum (Guo *et al*, 2015; Xu *et al*, 2017;  
88 Calabresi *et al*, 2007, 2000).

89

90 RTP801/REDD1, coded by the *DDIT4* gene, is a stress-regulated protein that is sufficient  
91 and necessary to induce neuron death (Shoshani *et al*, 2002; Malagelada *et al*, 2006). It is  
92 elevated in cellular and animal models of PD in response to dopaminergic neurotoxins  
93 (Malagelada *et al*, 2006; Ryu *et al*, 2005) and is highly up regulated in neuromelanin positive  
94 neurons in the substantia nigra pars compacta (SNpc) of both sporadic (Malagelada *et al*,  
95 2006) and parkin mutant PD patients (Romani-Aumedes *et al*, 2014). RTP801 induces

96 neuron death by a sequential inactivation of mTOR and the survival kinase Akt (Malagelada  
97 *et al*, 2008) via the tuberous sclerosis complex 1/2 (TSC1/2). Regarding HD, RTP801 levels  
98 are highly increased in HD human brains, in differentiated neurons derived from induced  
99 pluripotent stem cells (iPSC) from HD patients (Martín-Flores *et al*, 2016) and in striatal  
100 synapses from HD mouse models (Martín-Flores *et al*, 2020). Besides, in neuronal models  
101 of the disease, RTP801 mediates mutant huntingtin (mhtt)-induced toxicity (Martin-Flores *et*  
102 *al*, 2015). Importantly, RTP801 contributes to motor-learning dysfunction in HD since  
103 RTP801 knockdown prevents from the appearance of motor learning deficits in the R6/1  
104 model of the disease (Martín-Flores *et al*, 2020). This suggests that synaptic RTP801  
105 deregulation is a common hallmark in neurodegeneration. Indeed, RTP801 coding gene  
106 *DDIT4* was recently described as one of the top three common deregulated transcripts in  
107 *postmortem* brain samples from PD and HD patients (Labadorf *et al*, 2018). Furthermore,  
108 RTP801 is sufficient to cause neuronal atrophy and depressive-like behavior (Ota *et al*,  
109 2014) and it has a regulatory role in cortical development, neuronal differentiation  
110 (Malagelada *et al*, 2011) and peripheral nervous system myelination (Nosedá *et al*, 2013).  
111 However, its physiological role in synaptic plasticity has not been resolved yet. For this  
112 reason, here we investigated the potential synaptic function of RTP801 in the corticostriatal  
113 pathway. By using cellular and murine models and *postmortem* human brains and  
114 performing behavioral, histological, electrophysiological and biochemical analysis, our  
115 results describe the implication of RTP801 in motor learning plasticity.

116

117

## 118 **RESULTS:**

119

### 120 **RTP801 is localized in the synapses of murine and human samples and modulates** 121 **synaptic transmission *in vitro***

122 We first explored whether RTP801 was localized in synapses and whether it was involved in  
123 synaptic function, connectivity and transmission. Hence, we first isolated cortical and striatal

124 crude synaptosomes from adult *postmortem* human brain, adult rat and mouse brains and  
125 from cultured rat cortical neurons. In all samples we observed the presence of RTP801 or its  
126 enrichment in crude isolated synaptic terminals in comparison to the initial homogenates  
127 (**Fig 1 A**), corroborating our own previous results (Martín-Flores *et al*, 2020). Interestingly, in  
128 cultured cortical neurons, we observed that RTP801 was expressed in the soma, dendrites  
129 and dendritic spines (**Fig 1 B**).

130 We next investigated whether RTP801 depletion affected spine density and synaptic  
131 transmission. For this, we knocked down the expression of RTP801 in cortical primary  
132 cultures at 14DIV, using lentivirus expressing a specific shRNA for RTP801 or scramble  
133 shRNA as control. We observed that RTP801 silencing induced a significant decrease in  
134 spine density relative to the scramble shRNA transduced neurons (**Fig 1 C**). We next  
135 analyzed whether RTP801 expression abrogation affected synapse function by evaluating  
136 the frequency and the amplitude of mEPSCs of cortical cultures derived from WT and  
137 RTP801 KO mice. Interestingly, in the complete absence of RTP801 expression using  
138 cultured cortical neurons from RTP801 KO mice, we observed that both the amplitude (**Fig 1**  
139 **D1, D2 & D.3**) and frequency (**Fig 1 D1. D2 & D.4**) of mEPSCs were higher than the ones  
140 registered in WT cortical sister cultures.

141 We corroborated our *in vitro* results using cultured hippocampal neurons, a well  
142 characterized plasticity model. In line with previous results, we found that RTP801  
143 colocalized with PSD-95, an excitatory postsynaptic scaffold protein, but not with the  
144 presynaptic marker SV2A, indicating that RTP801 is localized in the postsynaptic  
145 compartment (**Fig S1 A-B**). Moreover, ectopic RTP801 expression attenuated the amplitude  
146 of mEPSCs without affecting the frequency, along with a decrease of PSD-95 and AMPAR  
147 receptor subunit GluA1 puncta intensity (**Fig S1 C-E**).

148

#### 149 **Synaptic and behavioral characterization of RTP801 KO mice brains**

150 Previous data pointed out that the total abrogation of RTP801 expression did not influence  
151 significantly either the brain structure or the basal behavior of the RTP801 KO mice in

152 comparison to WT animals (Brafman *et al*, 2004; Ota *et al*, 2014). However, we previously  
153 demonstrated that RTP801 regulated the timing of cortical neurogenesis and neuron  
154 differentiation/migration (Malagelada *et al*, 2011) using *in utero* electroporation techniques.  
155 For this reason, to validate the use of the RTP801 KO mouse to study its putative synaptic  
156 role, we characterized its brain morphology in comparison to WT animals. We first confirmed  
157 the lack of RTP801 expression in the KO animals in motor cortex homogenates (**Fig 2 A**).  
158 Macroscopically, although there were no differences in the mice body weight between  
159 genotypes (**Fig 2 B**), we observed that KO animals presented a decreased brain weight (**Fig**  
160 **2 C**). However, internal structural organization did not present major alterations either in  
161 cortical layers, hippocampus or even in the striatum, as judged by Nissl staining (**Fig 2 D**).  
162 Primary motor cortex (M1) layer thickness did not differ either between genotypes (**Fig 2 E**)  
163 but RTP801 KO mice showed an expected decreased cell density in the M1 LV (**Fig 2 F**).

164

165 We next investigated whether cortical spine density was affected in the adult brain of  
166 RTP801 KO mice using Golgi-Cox staining. Analyses were performed in the M1 layer V  
167 pyramidal neurons, the main excitatory and direct projection to the ipsi- and contralateral  
168 striatum in the corticostriatal pathway (Shepherd, 2013; Hintiryan *et al*, 2016; Anderson *et al*,  
169 2010; Xu *et al*, 2009). As previously seen by knocking down RTP801 in cortical cultured  
170 neurons (see **Fig 1 C**), we observed a reduction in the density of spines in LV neurons in  
171 naive RTP801 KO mice compared to WT animals (**Fig 2 G**).

172

173 Next, we assessed whether RTP801 modulate synaptic transmission in cortical brain slices  
174 from naïve WT and KO animals. We thus measured neuronal spike rate and bursting in M1  
175 LV using multielectrode array (MEA) (**Fig 2 H**). We found an increased spike rate in the LV  
176 of KO animals when compared with WT (**Fig 2 I.1**), with no differences between male and  
177 female animals (**Fig S2 A**). Analysis of spike-train patterns showed a higher burst rate and  
178 proportion of spikes included in bursts in KO primary motor cortex slices when compared  
179 with WT (**Figure 2 I.2-I.3**). We found no other differences in the burst parameters analyzed

180 **(Fig S2 B-D)**. These results support the hypothesis that neuronal excitability is increased in  
181 LV motor cortex in KO mice as an attempt to compensate the decreased number of synaptic  
182 spines.

183

184 To study whether synaptic structural and functional changes in RTP801 KO mice correlated  
185 with behavioral alterations, we next investigated whether the lack of RTP801 affected  
186 coordination, locomotion and motor learning. We first tested WT and KO mice for hindlimb  
187 claspings, a marker of disease progression in a number of mouse models of  
188 neurodegeneration, including HD (Mangiarini *et al*, 1996; Chou *et al*, 2008). We observed  
189 that RTP801 KO male mice displayed a claspings phenotype, not present in male WT mice.  
190 The tendency in females was similar but not significant **(Fig S3 A)**. We next explored  
191 whether gait, as a measure of coordination and muscle function, was affected in RTP801 KO  
192 mice. These animals showed a decrease in the length of the stride, stance, sway and the  
193 overlap **(Fig 3 A-B and Fig S3 B)**, suggesting gait impairment in the KO animals. We next  
194 examined whether general locomotor activity was altered using the Open Field test. Despite  
195 gait impairment, we did not find any differences in the total distance travelled in the RTP801  
196 KO mice relative to WT **(Fig 3 C)**. We did not find differences in the distance travelled in the  
197 center or the time spent in the center, suggesting that RTP801 KO mice do not exhibit  
198 anxiety-like behavior. Regarding other general exploratory and stereotypic behavior, we did  
199 not find any differences in grooming or wall and vertical rearing, either **(Fig S3 C)**.

200 To evaluate motor skill learning, we trained the WT and RTP801 KO animals in the  
201 accelerating rotarod. Both female and male KO mice showed the same trend to improve  
202 motor learning in this behavioral paradigm ( **Fig S3 D**). Together, RTP801 KO mice  
203 significantly improved performance in this task compared to WT animals (Genotype effect, \*\*  
204  $P=0.0058$ ) **(Fig 3 D)**. This result indicates that RTP801 is involved in motor learning  
205 acquisition.

206

207 **RTP801 modulates spine density and structure in the primary motor cortex of trained**  
208 **animals**

209 We next investigated whether the improvement in motor learning in the RTP801 KO mice  
210 affected differentially spine density and structure. Hence, since motor learning plasticity  
211 involves projections from the motor cortex to the dorsal striatum, we explored spine density  
212 and morphology in pyramidal neurons from the M1 LV and in medium spiny neurons (MSNs)  
213 from the dorsal striatum, one week after finishing the accelerating rotarod test (**Fig 4 A**).  
214 Similar to non-trained naïve RTP801 KO mice, trained RTP801 KO mice showed a decrease  
215 in the density of spines in LV pyramidal neurons (**Fig 4 B**), specifically in their basal  
216 dendrites. Interestingly, spine density of either cortical LV apical dendrites or dendrites in  
217 striatal MSNs did not change (**Fig 4 C-D**).

218

219 Based on these results, we investigated differences in spine morphology in the M1 LV  
220 pyramidal neurons that could explain the increased motor learning in the KO mice. Indeed,  
221 RTP801 KO animals displayed more filopodia but less branched spines (**Fig 5 A and Fig**  
222 **S4**). In line with this, when related with the total number of headed spines, we observed a  
223 higher percentage of mushroom spines in the basal dendrites of KO animals (**Fig 5 B.1,**  
224 **C.1**). Moreover, their head area was also increased. On the contrary, no differences were  
225 found in either the percentage or head area of thin spines (**Fig 5 C.1, C.2**).

226 We next asked whether this evidence in LV pyramidal neurons based on Golgi-Cox staining  
227 could be supported ultra-structurally by Transmission Electron Microscopy (TEM).  
228 Interestingly, we observed that KO mice synapses had bigger postsynaptic area (around  
229 10%) (**Fig 6 A**) along with a wider PSD area, length and thickness (around 5%, each) (**Fig 6**  
230 **B**). Interestingly KO mice exhibited a higher percentage of contacts containing mitochondria,  
231 mostly at the presynaptic compartment although the postsynaptic compartment showed a  
232 similar tendency (**Fig 6 C**). We did not find significant differences in the percentage of  
233 presynapses with more than one post-synapse, postsynapses with more than one  
234 presynapse or postsynapses with spine apparatus (**Fig S5 A-C**). Altogether, these results



235 support the idea that although the KO mice have a decreased number of spines in the motor  
236 cortex LV, they displayed a more efficient synaptic structure, leading to an improvement of  
237 motor learning skills.

238

### 239 **The lack of RTP801 elevates GluA1 AMPAR post-synaptically**

240 In line with the reduction in spine density in neurons from motor cortex LV in the RTP801 KO  
241 mice (**Fig 4B**), biochemical analysis of KO motor cortex crude synaptic fractions confirmed a  
242 decrease in PSD-95 (**Fig 7 A**) but an specific enrichment of synaptic GluA1 (**Fig 7 B**), a  
243 crucial AMPAR subunit that has been described to be a key mediator in the acquisition of  
244 new motor skills (Kida *et al*, 2016; Roth *et al*, 2020). On the other hand, GluA2 AMPAR  
245 subunit, the prototypical auxiliary subunit of AMPARs stargazin or the N-methyl-D-  
246 aspartate receptor (NMDAR) subunit GluN2B did not change in KO mice in comparison to  
247 WT (**Fig 7 B-C**). Interestingly, we observed that levels of TrkB were also elevated in total  
248 homogenates in the RTP801 KO motor cortex (**Fig 7 D**), supporting the idea of a synaptic  
249 strengthening. By immunostaining WT and KO sections against PSD95 and GluA1  
250 postsynaptic markers, we confirmed these initial biochemical observations specifically in M1  
251 layer V. Indeed, the number of PSD-95 and GluA1 puncta diminished in the KO animals (**Fig**  
252 **7E, H**) although the area and the intensity of the GluA1 dots were increased (**Fig 7 F-G**).  
253 Area and intensity of PSD-95 positive dots showed a non-significant increased tendency, as  
254 well (**Fig 7 F-G**). Altogether, these results suggest a novel synaptic role for RTP801  
255 modulating synaptic strength and motor learning in the motor cortex (**Fig 8**).

256

### 257 **DISCUSSION**

258 Here, we show a novel role for RTP801 in the modulation of synaptic plasticity in motor  
259 learning. The lack of RTP801 in mice resulted in decreased spine density and enhanced  
260 synaptic transmission in the primary motor cortex together with a better performance in the  
261 accelerating rotarod but altered gait and clasping. This improvement in motor learning skills

262 was associated with alterations in dendritic spine structure. Cortical neurons in the motor  
263 cortex M1 layer V showed higher number of filopodia- and a mushroom-like morphology and  
264 TEM analyses revealed increased postsynaptic size in neurons from LV. In line with that,  
265 trained RTP801 KO mice showed higher levels of synaptic AMPAR subunit GluA1 and a  
266 general increase in TrkB levels.

267

268 Since the only evidences that RTP801 could modulate synaptic plasticity were found in  
269 pathological conditions, here we studied for the first time the putative role of RTP801 in a  
270 physiological context. In a context of depressive disorders, RTP801 KO mice were found  
271 resilient to stress-induced synaptic loss in the PFC (Ota *et al*, 2014; Kabir *et al*, 2017).  
272 Moreover, RTP801 downregulation alleviated stress-induced neurodegeneration in a mouse  
273 model of genetic PD (Zhang *et al*, 2018). More recently, our group described that synaptic  
274 RTP801 mediated motor-learning dysfunction in the R6/1 mouse model of HD (Martín-Flores  
275 *et al*, 2020). However, its potential physiological synaptic role has never been investigated in  
276 depth.

277

278 Hence, we initially confirmed that RTP801 was present in the synapses from a wide range of  
279 human and murine samples, as we previously described in HD murine models and HD  
280 human postmortem samples (Martín-Flores *et al*, 2020). Interestingly, RTP801 was highly  
281 enriched in human and rat crude synaptosomes but not that elevated in synaptic WT mice  
282 samples. In line with that, in cortical cultures RTP801 was localized mostly post-synaptically.  
283 Interestingly, we found that spine density decreased in cortical cultures when RTP801  
284 expression was transiently downregulated and that was translated with an increase in the  
285 amplitude and frequency of mEPSCs in KO cortical cultures. An opposite effect was found  
286 when ectopic RTP801 was expressed in hippocampal primary cultures.

287 Previous studies pointed out that RTP801 KO mice had normal brains and similar behavior  
288 to WT animals (Brafman *et al*, 2004; Ota *et al*, 2014). However, no thorough behavioral,  
289 biochemical and histological studies were performed in these animals. Macroscopically, we

290 found that the KO mice brain weight less than WT brains, independently of the total body  
291 size, and it was likely due to a decrease in the cell density of M1 LV. Noteworthy, this  
292 difference can be explained by the developmental role of RTP801, which regulates both  
293 neurogenesis by regulating neuroprogenitors' proliferation rate and neuronal  
294 migration/differentiation in the cortex (Malagelada *et al*, 2011).

295

296 *In vivo*, the lack of RTP801 reduced spine density in the M1 layer V in the KO mice vs. WT.  
297 We observed a similar result when we transiently downregulated RTP801 in cultured cortical  
298 neurons (**Fig 1C**). Interestingly, KO animals showed higher synaptic performance in KO  
299 motor cortex (LV) slices *versus* WT. These results therefore suggest that the lack of RTP801  
300 decreases spine density but enhances synaptic function.

301

302 To investigate the role of RTP801 in synaptic plasticity *in vivo* we performed several motor  
303 behavioral tests and checked circuitries that control movement and motor learning. RTP801  
304 KO mice showed gait impairment but no alterations in general locomotor activity. It is  
305 noteworthy that gait abnormalities are more likely to be explained by cerebellar dysfunction  
306 and more studies will be needed in the future. Despite gait alterations, the lack of RTP801  
307 improved mouse motor learning skills. These results are in line with the work of Zhang *et al*  
308 (2018) (Zhang *et al*, 2018), where the knockdown of RTP801 in the substantia nigra partially  
309 rescued motor function in a mouse model of PD subjected to chronic-restraint stress. In  
310 addition, we recently described that striatal RTP801 knock down in the R6/1 mouse model of  
311 HD prevented from motor-learning deficits (Martín-Flores *et al*, 2020).

312

313 The most characterized circuitry involved in motor learning is the corticostriatal pathway.  
314 Pyramidal neurons from the M1 along with striatal MSNs predominantly undergo synaptic  
315 dynamics under motor learning (Tjia *et al*, 2017; Costa *et al*, 2004). Indeed, spine density in  
316 the M1 LV neurons from the RTP801 KO mice, specifically in their basal dendrites, was  
317 decreased. We did not observe any differences in spine density in the apical dendrites of the

318 same neurons or in the striatal MSNs from the KO mice. Related to the cortex, Ota and  
319 colleagues (Ota *et al*, 2014) did not find spine density differences in the prefrontal cortex  
320 (PFC) between WT and RTP801 KO mice in basal conditions. This fact, together with the  
321 absence of differences in the striatum in our work, may point towards a region-specific role  
322 of RTP801 in the normal (or physiological, non-stressed) mouse brain. Hence, RTP801  
323 could be contributing to motor learning at the basal dendrites of LV pyramidal neurons.

324

325 This speculation was also supported by the observations of the synaptic morphology in the  
326 motor cortex LV pyramidal neurons, where we observed a significant increase of filopodia  
327 along with a decrease in branched spines in the KO animals. Although the physiological  
328 meaning of branched spines is still in debate, filopodia have been proposed to be precursors  
329 of spines, to develop an explorative role to increase the probability to form a synapse (Ziv &  
330 Smith, 1996; Zuo *et al*, 2005). Thus, an increase in this type of spines could explain the  
331 better performance of the KO mice in the accelerating rotarod. However, filopodia-related  
332 plasticity must have a fine-tuned regulation, since a high remodeling rate might be  
333 troublesome (reviewed in (Ozcan, 2017)). Indeed, among headed spines, we detected an  
334 increase in the percentage and head area of mushroom-like spines from basal dendrites  
335 between WT and KO animals. This fact correlates well with the change of spine morphology  
336 and the function of the spines, and in the end, with an increase in synaptic strength of the  
337 area (Arellano *et al*, 2007; Yuste *et al*, 2000).

338

339 We confirmed a more complex postsynaptic compartment by TEM. The lack of RTP801 led  
340 to an increase in postsynaptic area in the synapses of the region of study, although no  
341 differences were detected in the presynaptic compartment. Strikingly, greater postsynaptic  
342 density size was detected in RTP801 KO animals in the same area. Interestingly, a positive  
343 correlation between the amount of PSD and spine size (Arellano *et al*, 2007) and the former  
344 with synaptic strength (Béïque & Andrade, 2003; Meyer *et al*, 2014) has been described.  
345 Moreover, KO synaptic contacts present more mitochondria, whose presence at the synapse

346 has been related with a role in controlling plasticity processes (Todorova & Blokland, 2017;  
347 Lee *et al*, 2018)). Our ultrastructural analyses, therefore, seem to indicate that, although the  
348 lack of RTP801 causes a decrease in spine density, the remaining spines are able to  
349 compensate this reduction at a structural level.

350

351 Interestingly, we observed a differential synaptic composition in the remaining spines in the  
352 M1 LV from RTP801 KO mice versus WT animals. We observed decreased levels of  
353 synaptic PSD-95 in crude synaptosomes that go in line with the decreased number of PSD-  
354 95 positive puncta in M1 LV observed by immunohistochemistry, along with a specific  
355 elevation of GluA1 AMPAR subunit at the synapses in M1 LV of KO mice. Calcium  
356 impermeable AMPARs (GluA2-containing; CI-AMPARs) are the most prevalent type of  
357 AMPAR in neurons (Lu *et al*, 2009) where they are responsible for postsynaptic currents and  
358 the depolarization of the postsynaptic neuron. In contrast, GluA1 subunit confers calcium  
359 permeability to the receptor. Calcium permeable AMPAR (CP-AMPARs) are mostly engaged  
360 to synaptic regulation and intracellular signaling (reviewed in (Man, 2011)). Therefore, the  
361 improved performance observed in the KO mice could be explained at least in part with this  
362 change in the AMPA receptors subunit composition. This could favor the presence of CP-  
363 AMPARs with high calcium permeability and then, in consequence, signaling activation and  
364 synaptic regulation. Interestingly, previous studies have demonstrated that motor learning  
365 induces an increase in GluA1 levels in dendritic spines in the motor cortex. This increment in  
366 GluA1 subunits are key modulators of synaptic plasticity induced by motor skill learning  
367 (Roth *et al*, 2020). The mechanism by which RTP801 could mediate this specific AMPAR  
368 subunits composition at the synapses to modulate motor learning has to be explored yet.  
369 Ectopic RTP801 overexpression showed the opposite result, since it reduced GluA1 puncta  
370 intensity in cultured hippocampal neurons. Remarkably, RTP801 silencing in R6/1 mice  
371 induced an increase of total levels of GluA1 and TrkB neurotrophin receptor. Indeed, in  
372 trained RTP801 KO mice we could also observe an increase in total levels of TrkB receptor.

373 This result is in line with other works describing that synaptic activity modulates both BDNF  
374 levels and TrkB receptors amount and localization (Guo *et al*, 2014; Lauterborn *et al*, 2000).

375

376 In summary, our work indicates a novel synaptic function for RTP801 in motor learning by  
377 modulating synaptic structure, composition and plasticity. This finding is important since  
378 motor learning impairment is a key feature of neurodegenerative diseases such as PD and  
379 HD. Altogether, our results point towards RTP801 downregulation as a promising  
380 therapeutic strategy to ameliorate motor learning dysfunction in these diseases.

381

## 382 **MATERIALS AND METHODS**

383

### 384 **Animals**

385 Transgenic RTP801 knock out mouse strain was generated by Lexicon Inc. as described in  
386 (Brafman *et al*, 2004). RTP801 knockout mice were obtained by homozygous pairing. Thus,  
387 wild type mice were bred from the RTP801 KO founder strains to obtain a C57Bl6/129sv  
388 background. RTP801 knock out and wild type mice were housed under controlled conditions  
389 (22°C, 40-60% humidity in a 12-hour light/dark cycle) with water and food available *ad*  
390 *libitum*. All the animals analyzed in this study were 2 months-old adult mice.

391

392 For further biochemical analyses, Golgi staining and TEM, mice were euthanized by cervical  
393 dislocation and tissue was dissected out. For immunohistochemistry, animals were  
394 processed as described elsewhere (Creus-Muncunill *et al*, 2018). Briefly, animals were  
395 anesthetized with 60mg/kg dolethal and intracardially perfused with 4% PFA. Coronal 25µm-  
396 thick brain sections were obtained with a cryostat.

397

### 398 **Rat primary cultures**

399 Rat cortical and hippocampal primary cultures were obtained from embryonic day 18  
400 Sprague-Dawley rats as previously described (Canal *et al*, 2016). Cells were either

401 transduced with lentiviral particles carrying a control shRNA or a specific shRNA against  
402 RTP801 or transfected with lipofectamine 2000 (Thermo Fisher Scientific) with pCMS  
403 vectors expressing eGFP (donated by Dr. Lloyd Greene, Columbia University) or eGFP-  
404 fused RTP801 protein (Romaní-Aumedes *et al*, 2014). The sequences to downregulate or  
405 overexpress RTP801 were previously described in (Malagelada *et al*, 2006).

406

#### 407 **Mouse primary cultures**

408 Mouse primary cortical cultures were obtained from embryonic day 15 mice. Coverslips were  
409 coated for 1h with 0.1 mg/ml poly-D-lysine (Merck) and then 3.5h with 0.018 mg/ml laminin  
410 (Thermo Fisher Scientific). Briefly, cortices were dissected out and chemically digested with  
411 41.66 $\mu$ M Trypsin for 10 minutes. Following mechanical digestion, cells were plated on  
412 coverslips at a density of 25.000 cells/cm<sup>2</sup> and maintained in Neurobasal-A medium  
413 supplemented with B27, GlutaMAX (all from Gibco), 33.3 mM Glucose and 1% penicillin-  
414 streptomycin (Sigma) in a 5% CO<sub>2</sub> atmosphere and 37°C.

415

#### 416 **Crude synaptosomal fractionation**

417 Tissue (rat, mice or *postmortem* human brains) or cultured cells were homogenized in  
418 Krebs-Ringer buffer (125mM NaCl, 1.2mM KCl, 22mM NaHCO<sub>3</sub>, 1mM NaH<sub>2</sub>PO<sub>4</sub>, 1.2mM  
419 MgSO<sub>4</sub>, 1.2mM CaCl<sub>2</sub>, 10 mM Glucose, 0.32 M Sucrose; pH 7.4). For samples in Figure 7,  
420 mice were sacrificed one week after behavioral testing. Initial lysate was first centrifuged at  
421 1.000g for 10 minutes. Supernatant (homogenate) was centrifuged for 20 minutes at  
422 16.000g to obtain the cytosolic fraction (supernatant) and the crude synaptosomal fraction  
423 (pellet), that was resuspended in Krebs-Ringer buffer.

424

#### 425 **Western blotting**

426 Samples were resolved in NuPAGE<sup>TM</sup>Novex<sup>TM</sup> polyacrylamide gels and proteins were  
427 transferred to nitrocellulose membranes with the iBlot system (all from Thermo Fisher  
428 Scientific). Indicated primary antibodies were incubated overnight at 4°C diluted in Tris-

429 buffered saline containing 0.1% Tween-20 and 5% BSA. Secondary antibodies (Thermo  
430 Fisher Scientific) were diluted in TBS-Tween with non-fat dry 5% milk (Bio-rad) for 1 hour.  
431 Proteins were detected with Supersignal™ West Pico Plus chemiluminiscent substrate  
432 (Thermo Fisher Scientific) and images were acquired with ChemiDoc™ (Bio-Rad). The  
433 following antibodies were used: RTP801 (1:500, Proteintech), HRP-conjugated anti-beta  
434 actin (1:100.000; Sigma), PSD-95 (1:1000; Thermo Fisher Scientific), SV2a and GFP  
435 (1:1000; Santa Cruz Biotechnology), GluA1, GluA2, Stargazin (1:1000; Merck Millipore),  
436 GluN2B (1:1000; Cell Signaling Technology) and TrkB (1:1000; BD Biosciences).

437

### 438 **Immunofluorescence**

439 Cells were fixed in 4% PFA and permeabilized with 0.25% Triton-X. Blocking and antibody  
440 incubation was performed with Superblock (Thermo Fisher Scientific). Primary antibodies  
441 were incubated over night at 4°C and secondary antibodies for 2h at room temperature. For  
442 mouse brain tissue immunofluorescence, sections were washed with PBS and incubated for  
443 30 min in NH<sub>4</sub>Cl. Next, sections were blocked with 0.3% Triton-100 10% NGS in PBS for 2h  
444 prior incubation with the primary antibodies diluted in blocking solution overnight at 4°C.  
445 Later, sections were washed and incubated for 2h with the secondary antibodies. Slices  
446 were then washed with PBS. Both cells and tissue samples were mounted with Prolong Gold  
447 antifade mountant (Thermo Fisher Scientific). The following antibodies were used: GFP  
448 (1:500), SV2a (1:100) (both from Santa Cruz Biotechnology), PSD-95 (1:50; Thermo Fisher  
449 Scientific), GluA1 (1:250-1:500; Merck Millipore) and RTP801 (1:100; Proteintech).  
450 AlexaFluor-488 or -555 secondary antibodies (1:500) and Hoechst33342 (1:5000) were from  
451 Thermo Fisher Scientific. Images were obtained with a Leica LCS SL or a Zeiss LSM880  
452 confocal microscopes with a 1024x1024 pixel resolution and a 63x magnification and were  
453 analyzed with ImageJ. For in vitro experiments in cortical neurons, at least 25 dendrites per  
454 group from three independent experiments were analyzed. For in vitro experiments in  
455 hippocampal neurons, at least 12 neurons per group were analyzed from three independent  
456 experiments. For double-labeled GluA1-PSD-95-positive clusters in brain slices, images



457 were acquired with 4x digital zoom (33.74x33.74  $\mu\text{m}$ ). For each mouse three representative  
458 images from two different coronal sections were analyzed. Colocalization was considered  
459 when there was at least one common pixel between GluA1 and PSD-95 detected puncta.

460

#### 461 **Nissl staining**

462 Slices were stained for 45 min with 0.2 mg/ml Cresyl violet (Sigma) in a 0.1 M acetic acid 0.1  
463 M sodium acetate solution. Next, slices were washed in distilled water and then dehydrated  
464 with ethanol (70, 95, 100%, 5 minutes each), washed with xylol and mounted with DPX  
465 media. Images were obtained with a 10x magnification with a Zeiss Axiolab.

466

#### 467 **Behavioral assessment**

468 **Footprint test:** Mice's fore and hindlimbs were painted in blue and red, respectively, with  
469 non-toxic ink. Animal's gait was then recorded letting them walk through a tunnel on white  
470 paper (10 cm wide, 40 cm long). The test was performed three times on the same day. In  
471 each trial three consecutive steps were measured for each parameter (stride, sway, stance,  
472 overlap).

473 **Open field test:** mice were placed in a 40x40x40 cm arena. The center area was considered  
474 as the central squared 20x20 cm space. Light intensity was 24 lux though-out the periphery  
475 and 29 lux in the center. Mice's movement was tracked and recorded for 10 minutes using  
476 SMART 3.0 Software (Panlab). Other parameters related to anxiety-like behaviors, like  
477 number of groomings, rearings and defecations were also monitored.

478 **Accelerating rotarod:** one day after the Open field test mice were subjected to the  
479 Accelerating rotarod test. Mice were placed on a 3 cm rod with an increasing speed from 4  
480 to 40 rpm over 5 minutes. Latency to fall was recorded as the time mice spent in the rod  
481 before falling. Accelerating rotarod test was performed for 4 days, 4 trials per day. Trials in  
482 the same day were separated by 1 hour.

483 **Clasping behavior:** Hindlimb clasping was measured by picking up mice at the base of the  
484 tail. In order to classify this phenotype we used the scale described in (Guyenet *et al*, 2010)

485 with minor modifications: 0 means no hind paw retraction, 1, one hindlimb retracted, 2, both  
486 hindlimbs partially retracted, and 3 when the 2 hindlimbs were totally retracted.

487

#### 488 **Golgi Staining and spine density and morphology analyses**

489 Golgi-Cox impregnation was performed with fresh brain hemispheres from, mice sacrificed  
490 one week after behavioral testing with FD Rapid GolgiStain™ kit (FD Neurotechnologies)  
491 following manufacturer's instructions. 100 µm slices were obtained with a Leica vibratome  
492 and mounted on gelatin-coated slides before final staining.

493 For spine density analyses only pyramidal neurons from layer V in the primary motor cortex  
494 or medium spiny neurons (MSNs) from the dorsolateral striatum were taken into account.

495 Spine density was quantified in dendritic segments of at least 10 µm and 30 different  
496 secondary/tertiary dendrites per animal were analyzed. Analyzed dendrites were 50% apical,  
497 50% basal.

498 Spine morphology analyses were performed in motor cortex layer V pyramidal neurons.  
499 Spines in 5 apical and 5 basal secondary/tertiary dendrites were analyzed for each animal (6  
500 WT and 4 KO), in segments of at least 10 µm long. A total of 100-125 apical and 100-125  
501 basal spines were analyzed per animal. Branched, filopodia and stubby spines were visually  
502 categorized. For headed spines, head area was measured in all headed spines and  
503 thin/mushroom classification was performed depending on the mean head area for each  
504 genotype (spines with head area greater than the mean were considered as mushroom  
505 spines and smaller ones were categorized as thin spines). In spine density and morphology  
506 analyses, animal genotype was blind for the experimenter.

507

#### 508 **Transmission electron microscopy**

509 2 months old RTP801 knock out (n=4) and wild type mice (n=4) were sacrificed one week  
510 after behavioral testing and motor cortex was dissected from coronal sections. From these  
511 sections, the lower half of the motor cortex, including Layer V and VI, was isolated and fixed

512 overnight in 2% glutaraldehyde 2% paraformaldehyde in 0.12 M phosphate buffer. After  
513 fixation, tissue was processed and analyzed as previously described in (Bosch *et al*, 2016).  
514 Electron micrographs were randomly taken at 25.000x with a TEM JEOL J1010 (tungsten  
515 filament), with a CCD Orius (Gatan) and software Digital Micrograph (Gatan). Spine density,  
516 pre/postsynaptic area and postsynaptic density area, length and thickness were determined  
517 (n=45-50 images for each animal) with ImageJ software. In all TEM analyses, animal  
518 genotype was blind for the experimenter.

519

## 520 **Electrophysiology**

521 **Rat neuronal cultures:** miniature excitatory postsynaptic currents (mEPSCs) were  
522 measured in rat primary hippocampal neurons plated on glass coverslips as previously  
523 described (Gilbert *et al*, 2016).

524 **Mouse cortical cultures:** Electrophysiological recordings of cultured cortical pyramidal  
525 neurons –chosen in basis of their characteristic pyramidal morphology– were performed at  
526 14 DIV. Whole-cell patch-clamp currents were recorded at room temperature (25–26 °C) in  
527 extracellular solution containing (in mM): 130 NaCl, 3.5 KCl, 10 HEPES, 15 glucose and 2  
528 CaCl<sub>2</sub> (pH 7.4; osmolarity 305 mOsm/Kg with sorbitol). AMPAR-mediated miniature  
529 excitatory postsynaptic currents (mEPSCs) were isolated adding to the extracellular solution  
530 1µM tetrodotoxin to block evoked synaptic transmission, 100µM picrotoxin to block  
531 GABA<sub>A</sub> receptors and 50µM APV to block NMDA receptors. Recording electrodes were  
532 fabricated from borosilicate glass with a final resistance of 4–5 MΩ and filled with an internal  
533 solution containing (in mM): 120 K-Gluconate, 16 KCl, 8 NaCl, 10 HEPES, 0.2 ethylene  
534 glycol tetraacetic acid (EGTA), 2 MgATP, 0.3 Na<sub>2</sub>GTP (pH 7.2; osmolarity 291 with sorbitol).  
535 Recordings were acquired at a sampling rate of 5KHz and were filtered at 2Hz. Miniature  
536 events were detected and analyzed with the WaveMetrics Igor Pro open-source software  
537 package Neuromatic (Rothman & Silver, 2018). Frequency was determined by dividing the  
538 number of detected events by the recorded time (in seconds).

539

## 540 **Electrophysiological field recordings**

541 Two-month old (female and male) mouse brain sagittal sections were obtained on a  
542 vibratome (Microm HM 650 V, Thermo Scientific, Waltham, MA, USA) at 350  $\mu\text{m}$  thickness  
543 in oxygenated (95%  $\text{O}_2$ , 5%  $\text{CO}_2$ ) ice-cold aCSF and then transferred to a oxygenated 32°C  
544 recovery solution for 15 min as previously described (Choi *et al*, 2019). Then, slices were  
545 transferred to oxygenated aCSF at room temperature and left for at least 1 h before  
546 electrophysiological field recording. Following recovery, mouse 350  $\mu\text{m}$  thick brain slices  
547 were placed in a multi electrode array (MEA) recording dish and fully submerged in  
548 oxygenated aCSF at 37 °C. Electrophysiological data were recorded with a MEA set-up from  
549 Multi Channel Systems MCS GmbH (Reutlingen, Germany) composed of a 60 channels  
550 USB-MEA60-inv system. Experiments were carried out with 60MEA200/30iR-ITO MEA  
551 dishes consisting of 60 planar electrodes (30  $\mu\text{m}$  diameter) arranged in an 8x8 array and  
552 placed in the motor cortex slice surface. Raw traces were recorded for 5 min from 58  
553 electrodes simultaneously, sampled at 5 kHz. Raw data were high-pass filtered with a 200-  
554 Hz Butterworth 2<sup>nd</sup> order filter, the noise level calculated by the standard deviation of the  
555 recorded signal on each electrode and spikes were identified as currents with a negative  
556 amplitude larger than -30 mV and slope values between 0.2 and 1. To quantify burst activity  
557 in spike-trains we applied the MaxInterval Method (Legendy & Salcman, 1985) with the  
558 following parameter values: maximum beginning ISI, 200 ms; maximum end ISI, 200 ms;  
559 minimum interburst interval, 20 ms, minimum burst duration 20 ms; minimum number of  
560 spikes in a burst, 5. Software for recording and signal processing was MC Rack from Multi  
561 Channel Systems. Using a digital camera during recording assessed the position of the brain  
562 slices on the electrode field to analyze information from electrodes specifically positioned on  
563 cortical layer V (**Fig 2 H**).

564

## 565 **Experimental design and statistical analyses**

566 Graphs show results reported as mean $\pm$ SEM. Data was assessed for normality using  
567 D'Agostino-Pearson, Shapiro-Wilk or Kolmogorov-Smirnov. Statistical analyses were  
568 performed using unpaired, two-tailed Student's T-test for normally distributed data, Mann-  
569 Whitney test for non-parametric data and Two-way ANOVA followed by Bonferroni's *post-*  
570 *hoc* tests to compare multiple groups, as appropriate and indicated in the figure legends.  
571 Values of  $P < 0.05$  were considered as statistically significant.

#### 572 **Ethical Approval and Consent to participate:**

573 All procedures were performed in compliance with the NIH Guide for the Care and Use of  
574 Laboratory Animals and approved by the local animal care committee of Universitat de  
575 Barcelona following European (2010/63/UE) and Spanish (RD53/2013) regulations for the  
576 care and use of laboratory animals.

577 Human samples were obtained following the guidelines and approval of the local ethics  
578 committee (Hospital Clínic of Barcelona's Clinical Research Ethics Committee).

579

580

#### 581 **ACKNOWLEDGEMENTS:**

582 The authors thank Dr. Sílvia Ginés, Dr. Verónica Brito and Dr. Albert Giralt for helpful  
583 discussion. We also thank Dr. Albert Martínez from the Faculty of Biology from our same  
584 University, for his TEM assessment and guidance. We thank the Neurological Tissue Bank  
585 of the Biobanc-Hospital Clínic-IDIBAPS (Barcelona, Spain) and Dr. Ellen Gelpi for providing  
586 human tissue samples. We thank Maria Calvo from the Advanced Microscopy Unit, Scientific  
587 and Technological Centers, University of Barcelona, for their support and advice in confocal  
588 techniques.

589

#### 590 **FUNDING:**

591 Financial support was obtained from the Spanish Ministry of Economy and Competitivity  
592 MINECO (grants SAF2014-57160-R (AEI/FEDER, UE) for CM and J.A., SAF2017-88076-R

593 (AEI/FEDER, UE) for J.A & M.J.R., and SAF2017-88812 R (AEI/FEDER, UE) for C.M. We  
594 also thank Portal d'Avall S.L. for L.P-S. fellowship. Mice and neuron illustrations were  
595 designed by Jorge Padilla Rubio.

596

597 **AUTHOR CONTRIBUTION:**

598 L.P-S., N.M-F., M.M., J.S., A.LL., J.R-A., J.S., G.C., M.C., D.S., X.G., J.A and C.M. have  
599 contributed in the conception and design of the study, acquisition and analysis of data and in  
600 drafting the manuscript and figures. G.C., E.G-G., N.S-F., S.F-G., J.P.G., M.J.R., H-Y.M.,  
601 E.F. and D.W., have contributed in acquisition and analysis of data and in drafting the  
602 manuscript and figures.

603

604 **CONFLICT OF INTERESTS:** None

605

606

607

608 **REFERENCES:**

- 609 Anderson CT, Sheets PL, Kiritani T & Shepherd GMG (2010) Sublayer-specific microcircuits  
610 of corticospinal and corticostriatal neurons in motor cortex. *Nat Neurosci* 13: 739–744
- 611 Arellano JI, Benavides-Piccione R, Defelipe J & Yuste R (2007) Ultrastructure of dendritic  
612 spines: correlation between synaptic and spine morphologies. *Front Neurosci* 1: 131–  
613 43
- 614 Béïque JC & Andrade R (2003) PSD-95 regulates synaptic transmission and plasticity in rat  
615 cerebral cortex. *J Physiol* 546: 859–867 doi:10.1113/jphysiol.2002.031369 [PREPRINT]
- 616 Bosch C, Muhaisen A, Pujadas L, Soriano E & Martínez A (2016) Reelin Exerts Structural,  
617 Biochemical and Transcriptional Regulation Over Presynaptic and Postsynaptic  
618 Elements in the Adult Hippocampus. *Front Cell Neurosci* 10: 138
- 619 Brafman A, Mett I, Shafir M, Gottlieb H, Damari G, Gozlan-Kelner S, Vishnevskia-Dai V,  
620 Skaliter R, Einat P, Faerman A, *et al* (2004) Inhibition of oxygen-induced retinopathy in

- 621 RTP801-deficient mice. *Invest Ophthalmol Vis Sci* 45: 3796–3805
- 622 Calabresi P, Centonze D, Gubellini P, Marfia GA, Pisani A, Sancesario G & Bernardi G  
623 (2000) Synaptic transmission in the striatum: from plasticity to neurodegeneration. *Prog*  
624 *Neurobiol* 61: 231–65
- 625 Calabresi P, Galletti F, Saggese E, Ghiglieri V & Picconi B (2007) Neuronal networks and  
626 synaptic plasticity in Parkinson's disease: beyond motor deficits. *Park Relat Disord* 13  
627 Suppl 3: S259-62
- 628 Canal M, Martín-Flores N, Pérez-Sisqués L, Romaní-Aumedes J, Altas B, Man H-Y, Kawabe  
629 H, Alberch J & Malagelada C (2016) Loss of NEDD4 contributes to RTP801 elevation  
630 and neuron toxicity: implications for Parkinson's disease. *Oncotarget*
- 631 Choi K, Holly EN, Davatolhagh MF, Beier KT & Fuccillo M V. (2019) Integrated anatomical  
632 and physiological mapping of striatal afferent projections. *Eur J Neurosci* 49: 623–636
- 633 Chou AH, Yeh TH, Ouyang P, Chen YL, Chen SY & Wang HL (2008) Polyglutamine-  
634 expanded ataxin-3 causes cerebellar dysfunction of SCA3 transgenic mice by inducing  
635 transcriptional dysregulation. *Neurobiol Dis* 31: 89–101
- 636 Costa RM, Cohen D & Nicoletis MAL (2004) Differential corticostriatal plasticity during fast  
637 and slow motor skill learning in mice. *Curr Biol* 14: 1124–1134
- 638 Creus-Muncunill J, Rué L, Alcalá-Vida R, Badillos-Rodríguez R, Romaní-Aumedes J, Marco  
639 S, Alberch J, Perez-Otaño I, Malagelada C & Pérez-Navarro E (2018) Increased Levels  
640 of Rictor Prevent Mutant Huntingtin-Induced Neuronal Degeneration. *Mol Neurobiol*
- 641 Fu M, Yu X, Lu J & Zuo Y (2012) Repetitive motor learning induces coordinated formation of  
642 clustered dendritic spines in vivo. *Nature* 483: 92–96
- 643 Gilbert J, Shu S, Yang X, Lu Y, Zhu L-Q & Man H-Y (2016)  $\beta$ -Amyloid triggers aberrant over-  
644 scaling of homeostatic synaptic plasticity. *Acta Neuropathol Commun* 4: 131
- 645 Guo L, Xiong H, Kim J-I, Wu Y-W, Lalchandani RR, Cui Y, Shu Y, Xu T & Ding JB (2015)  
646 Dynamic rewiring of neural circuits in the motor cortex in mouse models of Parkinson's  
647 disease. *Nat Neurosci* 18: 1299–1309
- 648 Guo W, Ji Y, Wang S, Sun Y & Lu B (2014) Neuronal activity alters BDNF-TrkB signaling

- 649 kinetics and downstream functions. *J Cell Sci* 127: 2249–60
- 650 Guyenet SJ, Furrer SA, Damian VM, Baughan TD, La Spada AR & Garden GA (2010) A  
651 Simple Composite Phenotype Scoring System for Evaluating Mouse Models of  
652 Cerebellar Ataxia. *J Vis Exp*
- 653 Hintiryan H, Foster NN, Bowman I, Bay M, Song MY, Gou L, Yamashita S, Bienkowski MS,  
654 Zingg B, Zhu M, *et al* (2016) The mouse cortico-striatal projectome. *Nat Neurosci* 19:  
655 1100–1114
- 656 Kabir ZD, Lee AS, Burgdorf CE, Fischer DK, Rajadhyaksha AM, Mok E, Rizzo B, Rice RC,  
657 Singh K, Ota KT, *et al* (2017) Cacna1c in the Prefrontal Cortex Regulates Depression-  
658 Related Behaviors via REDD1. *Neuropsychopharmacology* 42: 2032–2042
- 659 Kida H, Tsuda Y, Ito N, Yamamoto Y, Owada Y, Kamiya Y & Mitsushima D (2016) Motor  
660 Training Promotes Both Synaptic and Intrinsic Plasticity of Layer II/III Pyramidal  
661 Neurons in the Primary Motor Cortex. *Cereb Cortex* 26: 3494–3507
- 662 Labadorf A, Choi SH & Myers RH (2018) Evidence for a Pan-Neurodegenerative Disease  
663 Response in Huntington’s and Parkinson’s Disease Expression Profiles. *Front Mol*  
664 *Neurosci* 10: 430
- 665 Lauterborn JC, Lynch G, Vanderklish P, Arai A & Gall CM (2000) Positive modulation of  
666 AMPA receptors increases neurotrophin expression by hippocampal and cortical  
667 neurons. *J Neurosci* 20: 8–21
- 668 Lee A, Hirabayashi Y, Kwon SK, Lewis TL & Polleux F (2018) Emerging roles of  
669 mitochondria in synaptic transmission and neurodegeneration. *Curr Opin Physiol* 3: 82–  
670 93 doi:10.1016/j.cophys.2018.03.009 [PREPRINT]
- 671 Legendy CR & Salcman M (1985) Bursts and recurrences of bursts in the spike trains of  
672 spontaneously active striate cortex neurons. *J Neurophysiol* 53: 926–939
- 673 Lu W, Shi Y, Jackson AC, Bjorgan K, During MJ, Sprengel R, Seeburg PH & Nicoll RA  
674 (2009) Subunit Composition of Synaptic AMPA Receptors Revealed by a Single-Cell  
675 Genetic Approach. *Neuron* 62: 254–268
- 676 Malagelada C, Lopez-Toledano MA, Willett RT, Jin ZH, Shelanski ML & Greene LA (2011)



- 677 RTP801/REDD1 regulates the timing of cortical neurogenesis and neuron migration. *J*  
678 *Neurosci* 31: 3186–3196
- 679 Malagelada C, Ryu EJ, Biswas SC, Jackson-Lewis V & Greene LA (2006) RTP801 is  
680 elevated in Parkinson brain substantia nigral neurons and mediates death in cellular  
681 models of Parkinson's disease by a mechanism involving mammalian target of  
682 rapamycin inactivation. *J Neurosci* 26: 9996–10005
- 683 Malagelada C, Zong HJ & Greene LA (2008) RTP801 is induced in Parkinson's disease and  
684 mediates neuron death by inhibiting Akt phosphorylation/activation. *J Neurosci* 28
- 685 Man H-Y (2011) GluA2-lacking, calcium-permeable AMPA receptors — inducers of  
686 plasticity? *Curr Opin Neurobiol* 21: 291–298
- 687 Mangiarini L, Sathasivam K, Seller M, Cozens B, Harper A, Hetherington C, Lawton M,  
688 Trotter Y, Lehrach H, Davies SW, *et al* (1996) Exon I of the HD gene with an expanded  
689 CAG repeat is sufficient to cause a progressive neurological phenotype in transgenic  
690 mice. *Cell* 87: 493–506
- 691 Martín-Flores N, Pérez-Sisqués L, Creus-Muncunill J, Masana M, Ginés S, Alberch J, Pérez-  
692 Navarro E & Malagelada C (2020) Synaptic RTP801 contributes to motor-learning  
693 dysfunction in Huntington's disease. *Cell Death Dis* 11: 1–15
- 694 Martín-Flores N, Romani-Aumedes J, Rué L, Canal M, Sanders P, Straccia M, Allen ND,  
695 Alberch J, Canals JM, Pérez-Navarro E, *et al* (2016) RTP801 Is Involved in Mutant  
696 Huntingtin-Induced Cell Death. *Mol Neurobiol* 53: 2857–2868
- 697 Martín-Flores N, Romani-Aumedes J, Rue L, Canal M, Sanders P, Straccia M, Allen  
698 NDDNDNDD, Alberch J, Canals JM, Perez-Navarro E, *et al* (2015) RTP801 Is Involved  
699 in Mutant Huntingtin-Induced Cell Death. *Mol Neurobiol* 53: 2857–2868
- 700 Meyer D, Bonhoeffer T & Scheuss V (2014) Balance and stability of synaptic structures  
701 during synaptic plasticity. *Neuron* 82: 430–443
- 702 Nosedá R, Belin S, Piguet F, Vaccari I, Scarlino S, Brambilla P, Martinelli Boneschi F, Feltri  
703 ML, Wrabetz L, Quattrini A, *et al* (2013) DDIT4/REDD1/RTP801 is a novel negative  
704 regulator of Schwann cell myelination. *J Neurosci* 33: 15295–305

- 705 Ota KT, Liu RJ, Voleti B, Maldonado-Aviles JG, Duric V, Iwata M, Duteil S, Duman C,  
706 Boikess S, Lewis DA, *et al* (2014) REDD1 is essential for stress-induced synaptic loss  
707 and depressive behavior. *Nat Med* 20: 531–535
- 708 Ozcan AS (2017) Filopodia: A Rapid Structural Plasticity Substrate for Fast Learning. *Front*  
709 *Synaptic Neurosci* 9: 12
- 710 Peters AJ, Liu H & Komiyama T (2017) Learning in the Rodent Motor Cortex. *Annu Rev*  
711 *Neurosci* 40: 77–97
- 712 Romani-Aumedes J, Canal M, Martin-Flores N, Sun X, Perez-Fernandez V, Wewering S,  
713 Fernandez-Santiago R, Ezquerro M, Pont-Sunyer C, Lafuente A, *et al* (2014) Parkin  
714 loss of function contributes to RTP801 elevation and neurodegeneration in Parkinson's  
715 disease. *Cell Death Dis* 5: e1364
- 716 Romani-Aumedes J, Canal M, Martín-Flores N, Sun X, Pérez-Fernández V, Wewering S,  
717 Fernández-Santiago R, Ezquerro M, Pont-Sunyer C, Lafuente A, *et al* (2014) Parkin  
718 loss of function contributes to RTP801 elevation and neurodegeneration in Parkinson's  
719 disease. *Cell Death Dis* 5
- 720 Roth RH, Cudmore RH, Tan HL, Hong I, Zhang Y & Huganir RL (2020) Cortical Synaptic  
721 AMPA Receptor Plasticity during Motor Learning. *Neuron* 105: 895-908.e5
- 722 Rothman JS & Silver RA (2018) NeuroMatic: An Integrated Open-Source Software Toolkit  
723 for Acquisition, Analysis and Simulation of Electrophysiological Data. *Front Neuroinform*  
724 12
- 725 Ryu EJ, Angelastro JM & Greene LA (2005) Analysis of gene expression changes in a  
726 cellular model of Parkinson disease. *Neurobiol Dis* 18: 54–74
- 727 Sanes JN & Donoghue JP (2000) Plasticity and Primary Motor Cortex. *Annu Rev Neurosci*  
728 23: 393–415
- 729 Shepherd GMG (2013) Corticostriatal connectivity and its role in disease. *Nat Rev Neurosci*  
730 14: 278–291 doi:10.1038/nrn3469 [PREPRINT]
- 731 Shepherd JD & Huganir RL (2007) The Cell Biology of Synaptic Plasticity: AMPA Receptor  
732 Trafficking. *Annu Rev Cell Dev Biol* 23: 613–643

- 733 Shoshani T, Faerman A, Mett I, Zelin E, Tenne T, Gorodin S, Moshel Y, Elbaz S, Budanov  
734 A, Chajut A, *et al* (2002) Identification of a novel hypoxia-inducible factor 1-responsive  
735 gene, RTP801, involved in apoptosis. *Mol Cell Biol* 22: 2283–2293
- 736 Tjia M, Yu X, Jammu LS, Lu J & Zuo Y (2017) Pyramidal Neurons in Different Cortical  
737 Layers Exhibit Distinct Dynamics and Plasticity of Apical Dendritic Spines. *Front Neural*  
738 *Circuits* 11: 43
- 739 Todorova V & Blokland A (2017) Mitochondria and Synaptic Plasticity in the Mature and  
740 Aging Nervous System. *Curr Neuropharmacol* 15: 166–173
- 741 Xu T, Wang S, Lalchandani RR & Ding JB (2017) Motor learning in animal models of  
742 Parkinson's disease: Aberrant synaptic plasticity in the motor cortex. *Mov Disord* 32:  
743 487–497
- 744 Xu T, Yu X, Perlik AJ, Tobin WF, Zweig JA, Tennant K, Jones T & Zuo Y (2009) Rapid  
745 formation and selective stabilization of synapses for enduring motor memories. *Nature*  
746 462: 915–919
- 747 Yuste R, Majewska A & Holthoff K (2000) From form to function: calcium  
748 compartmentalization in dendritic spines. *Nat Neurosci* 3: 653–659
- 749 Zhang Z, Chu S-F, Wang S-S, Jiang Y-N, Gao Y, Yang P-F, Ai Q-D & Chen N-H (2018)  
750 RTP801 is a critical factor in the neurodegeneration process of A53T  $\alpha$ -synuclein in a  
751 mouse model of Parkinson's disease under chronic restraint stress. *Br J Pharmacol*  
752 175: 590–605
- 753 Ziv NE & Smith SJ (1996) Evidence for a role of dendritic filopodia in synaptogenesis and  
754 spine formation. *Neuron* 17: 91–102
- 755 Zuo Y, Lin A, Chang P & Gan W-B (2005) Development of Long-Term Dendritic Spine  
756 Stability in Diverse Regions of Cerebral Cortex. *Neuron* 46: 181–189
- 757
- 758
- 759 **ABBREVIATIONS:**

760 Alzheimer's disease (AD); Huntington's disease (HD); knock out (KO); mechanistic target of  
761 rapamycin (mTOR); primary motor cortex (M1), motor cortex layer V (LV); mutant huntingtin  
762 (mhtt); microelectrode arrays (MEAs); miniature excitatory postsynaptic currents (mEPSC);  
763 Parkinson's disease (PD); induced pluripotent stem cells (iPSC); postsynaptic density  
764 (PSD); transmission electron microscopy (TEM); tuberous sclerosis complex (TSC1/2);  
765 substantia nigra pars compacta (SNpc); wild type (WT).

766

767

#### 768 **FIGURE LEGENDS:**

769 **Figure 1. RTP801 is present at the synapse and modulates neuronal transmission. A.**

770 **RTP801 protein is found in the synaptic compartment.** Homogenate (H) and crude  
771 synaptic fraction (S) were obtained from human *postmortem cortex (CTX) and putamen*  
772 (*STR*), adult rat cortex (CTX) and striatum (STR), primary cortical cultures at 14 DIVs and  
773 cortex from both 2-months old WT and RTP801 KO mice. Whole cell lysate (L) from NGF-  
774 differentiated PC12 cells was added as a positive control to detect RTP801 in mouse brains.  
775 Samples were analyzed by western blot and probed against RTP801 (specific band pointed  
776 out by \*), postsynaptic protein PSD-95 and actin as a loading control. **B. RTP801 is present**

777 **ubiquitously in neurons, including at the synapses.** Primary rat cortical cultures were  
778 fixed at 14DIVs and stained for RTP801 (grey). Phalloidin (red) was used to visualize actin  
779 cytoskeleton. Nuclei were stained with Hoechst33342 (in blue). White arrows point F-actin-  
780 labeled dendritic spines colocalizing with endogenous RTP801 staining. **C. RTP801**

781 **knockdown reduces spine density in cultured cortical neurons.** Primary rat cortical  
782 neurons were transduced with lentiviral particles carrying a GFP-tagged control shRNA or an  
783 shRNA against RTP801. 4 days later (14 DIVs), cells were fixed and analyzed by  
784 immunofluorescence against GFP (green). *Scale bar, 5µm.* **D. Abrogation of RTP801**

785 **expression modulates synaptic plasticity *in vitro*.** **D.1.** Representative 20 seconds  
786 whole-cell recording of mEPSCs at a membrane voltage of  $-70\text{mV}$  from WT or RTP801 KO  
787 mice cultured cortical pyramidal neurons (14 DIV). A magnification (0.5 seconds) for both

788 traces is shown below where asterisks denote the detected events. **D.2.** Example of  
789 averaged mEPSCs (red lines) superimposed on the individual mEPSCs (in black) from a  
790 wild type (average of 962 events) and RTP801 knockout (average of 236 events) culture.  
791 **D.3.** RTP801 KO recordings show differences in mEPSCs mean amplitude. **D.4.** The  
792 frequency of detected events in RTP801 KO neurons was statistically increased compared  
793 with WT. mEPSCs frequencies were obtained from same recordings shown in D.3. All data  
794 is presented as mean  $\pm$  SEM from the recordings performed in 15 WT neurons and 25 KO  
795 neurons from at least six independent neuronal cultures. Statistical analyses for spine  
796 density and mEPSC amplitude were performed with Student's t-test, \* $P < 0.05$ , \*\*\* $P < 0.001$  vs.  
797 shCt/WT and with Mann-Whitney test for mEPSC frequency, \* $P < 0.05$  vs. WT.

798

799 **Figure 2. RTP801 KO mice show decreased brain size, decreased cortical spine**  
800 **density and enhanced synaptic transmission.**

801 **A.** Whole brain extracts from WT and RTP801 KO mice at 2 months of age were subjected  
802 to western blot. Membranes were probed against RTP801 (specific band is pointed out by \*)  
803 and actin as loading control. **B.** 9-weeks long follow-up shows that RTP801 KO animals  
804 display normal weight. **C.** RTP801 KO mice exhibit decreased brain weight. Whole brain  
805 weight was measured in 2-months-old animals. **D.** Brain sections of WT and KO mice were  
806 subjected to Nissl staining to visualize cell somas. Representative images of motor cortex  
807 (CTX), hippocampus (HIP) and striatum (STR) for both genotypes are shown. *Scale bar,*  
808 *250 $\mu$ m.* Motor cortex thickness (**E**) and LV cell density (**F**) were quantified in Nissl-stained  
809 sections. **G.** RTP801 total knockout mice show decreased spine density in motor cortex  
810 layer V. Spine density was quantified in 30 dendrites/animal, 50% apical and 50% basal, in 5  
811 WT and 5 KO animals. *Scale bar, 10  $\mu$ m.* **H.** Image of a brain sagittal slice on the MEA  
812 (magnification). Recordings from the selected electrodes (in red), located on LV, were  
813 analyzed. Motor cortex layers I-VI and *corpus callosum* (CC) are indicated. *Scale bar, 600*  
814  *$\mu$ m.* **I.** Spontaneous activity by MEA: Illustrative long time-scale (90 min) spike rasters of  
815 recorded LV motor cortex spontaneous activity from WT (4 males and 3 females) and

816 RTP801 KO (4 males and 4 females) mouse brain slices (1 slice per animal); the horizontal  
817 lines above each raster define bursts. Graphs show quantification of spike rate (**I.1**), burst  
818 rate (**I.2**), and the percent of spikes that form bursts (**I.3**) of field spontaneous activity  
819 recorded by MEA. Data in all graphs are presented as mean  $\pm$  SEM. \*  $P < 0.05$ , \*\*\* $P < 0.001$ ;  
820 two-tailed Student t-test *versus* WT (**C, F**). \* $P < 0.05$ ; Mann-Whitney test *versus* WT (**I.1-I.3**).  
821 Data in (**B, E**) was analyzed by two-way ANOVA.

822

823 **Figure 3. RTP801 contributes to motor learning and gait but does not alter general**  
824 **locomotor activity. A.** Schematic representation of the four different parameters measured  
825 in the footprint test: stride, sway, stance and limbs overlap (in blue, forelimb prints and, in  
826 red, hindlimb prints). **B.** Representative examples of footprint tracking from both genotypes.  
827 Graphs on the right show hindlimb lengths for stride, sway, stance and limbs overlap. Data is  
828 represented as mean  $\pm$  SEM and was analyzed with two-tailed Student's t-test. \*  $P < 0.05$ , \*\*  
829  $P < 0.01$ , \*\*\*  $P < 0.001$  *versus* WT group. N = 13 WT (8 males + 5 females) and 12 KO (4  
830 males + 8 females). **C.** Representative tracking of mice activity recorded for 10 minutes in an  
831 open field test. Graphs on the right show total distance traveled in the whole arena (blue),  
832 distance traveled in the center (red) and percentage of time spent in the center. Measures  
833 are shown as mean  $\pm$  SEM. There are no statistically significant differences according to the  
834 Student's t-tests performed. N = 18 WT (6 males + 12 females) and 17 KO (7 males + 10  
835 females). **D.** WT and RTP801 KO mice were subjected to the accelerating rotarod test and  
836 the time spent on it was evaluated for three days, four trials per day. Data is represented as  
837 mean  $\pm$  SEM and was analyzed by two-way ANOVA followed by Bonferroni's multiple  
838 comparisons test for *post hoc* analyses. Genotype effect: \*\*  $P < 0.01$ . Multiple comparisons: \*  
839  $P < 0.05$ , \*\*  $P < 0.01$ , \*\*\*  $P < 0.001$  *versus* WT group in each trial. N = 31 WT (14 males + 17  
840 females) and 30 KO (12 males + 18 females).

841

842 **Figure 4. RTP801 modulates dendritic spine density and morphology of pyramidal**  
843 **neurons in M1 in motor-trained animals.** One week after the accelerating rotarod test, WT

844 and RTP801 KO mice were culled and their brains were impregnated with Golgi-Cox  
845 staining prior to analyze changes in spine density. **A, B. Loss of RTP801 expression**  
846 **decreases spine density of pyramidal neurons from M1.** Spine density was quantified  
847 combining both apical and basal dendrites from M1 LV pyramidal neurons. **A, C.**  
848 **Abrogation of RTP801 expression affects specifically basal dendrites of pyramidal**  
849 **neurons in M1.** Spine density was assessed in apical and basal dendrites. Each bar of the  
850 graphs represents mean  $\pm$  SEM of at least 30 dendrites per animal (N= 8 WT and 5 KO),  
851 approximately 50% apical and 50% basal. **A, D. Loss of RTP801 expression does not**  
852 **affect spine density in the striatum.** Spine density was also analyzed in striatal MSNs.  
853 Data in the graph represent mean  $\pm$  SEM of at least 30 dendrites per animal (N= 8 WT and 5  
854 KO). Statistical analyses in a were performed with Mann-Whitney test,  $**P < 0.01$  vs. WT, and  
855 by Two-tailed Student's t-test in c-d;  $** P < 0.01$  versus WT. Cortical layers (I, II/III, V, VI),  
856 *corpus callosum* (CC) and striatum (STR) are depicted in **A**. Representative WT and KO  
857 dendrites from primary motor cortex and striatum are shown (**B, D**). *Scale bar*, 10  $\mu$ m.

858

859 **Figure 5. RTP801 modulates spine morphology of pyramidal neurons in the motor**  
860 **cortex of trained animals.** Golgi-stained brains were processed and spine morphology of  
861 pyramidal neurons from M1 layer V were analyzed. Schematic representations show the  
862 spine morphologies considered in this study. **A.** RTP801 KO mice show reduced  
863 percentages of branched spines but increased percentage of filopodia spines in layer V  
864 neurons. Graphs show the percentage of each morphological type of dendritic spines *versus*  
865 total number of spines analyzed. Percentage of apical and basal thin (**B.1**) and mushroom  
866 (**C.1**) spines *versus* total number of spines with head. Spine density measures are  
867 represented as mean  $\pm$  SEM of 50 dendrites per genotype (5 animals per genotype, 5 basal  
868 and 5 apical dendrites per animal). Apical and basal spines were analyzed separately. Data  
869 in **A, B.1** and **C.1** was analyzed with two-tailed Student's t-test,  $* P < 0.05$ ,  $** P < 0.01$  *versus*  
870 WT. Cumulative probability of apical and basal spine head area in thin (**B.2**) and mushroom  
871 (**C.2**). Distributions were compared with the Kolmogorov–Smirnov test. Apical and basal

872 spines were analyzed separately. 5 animals/genotype were analyzed, 5 apical and 5 basal  
873 dendrites per animal. Spine head area from basal mushroom spines shows significant  
874 differences between genotypes,  $D=0.2747$ ,  $P=0.0021$ .

875

876 **Figure 6. Synaptic contacts show structural differences between WT and RTP801 KO**  
877 **animals in the motor cortex after motor skill training.** Motor cortex lower layers were  
878 analyzed by TEM. **A. Postsynaptic area is increased in RTP801 KO mice synaptic**  
879 **contacts. B. Postsynaptic density (PSD) area, length and thickness are increased in**  
880 **RTP801 KO mice synaptic contacts.** Histograms show mean  $\pm$  SEM of the different  
881 measures analyzed relative to control mean. Images show a representative PSD for each  
882 genotype. **C. Increased presence of mitochondria in RTP801 KO synaptic contacts.**  
883 Graphs show the percentage of mitochondria found in synaptic contacts (either in the pre- or  
884 postsynaptic compartment) and in the presynapses or postsynapses separately. Data is  
885 represented as mean percentage  $\pm$  SEM. Images show representative contacts where a  
886 mitochondrion (M) is present in either the presynapse (PRE) or postsynapse (POST). All  
887 histograms represent data from 45-50 images per animal, four animals per genotype. Data  
888 in a-c represent data relative to WT mean. Data was analyzed with Mann-Whitney test. \*  $P <$   
889  $0.05$ , \*\*  $P < 0.01$ , \*\*\*  $P < 0.001$  versus WT control. For all electron micrographs, *Scale bar*,  
890 250 nm.

891

892 **Figure 7. RTP801 modulates synaptic composition in the cortex from motor-trained**  
893 **mice. A-C. Lack of RTP801 expression decreases PSD-95 levels but increases AMPAR**  
894 **subunit GluA1 levels in synaptosomes.** Levels of postsynaptic proteins were analyzed in  
895 2-months-old WT and RTP801 KO animals. Crude synaptosomal fractions were obtained  
896 from cortical brain lysates and analyzed by western blotting. Representative images of PSD-  
897 95 (A), GluA1, GluA2, Stargazin (B), GluN2B (C) and actin are shown. **D. Lack of RTP801**  
898 **expression increases TrkB receptor levels in motor cortex homogenates.** In the same  
899 WT and KO samples levels of full length TrkB was assessed by western blotting from



900 homogenates. Representative images of TrkB and actin are shown. Densitometric measures  
901 (mean  $\pm$  SEM) of total levels of PSD-95 and TrkB were relativized against actin and synaptic  
902 levels of the different proteins in the synaptic fraction were relativized against synaptic  
903 marker PSD-95. **E-H.** M1 LV excitatory postsynaptic characterization in 2-months old WT  
904 and RTP801 KO mice after performing behavioral motor tasks. **E.** Quantification of the  
905 number of PSD-95, GluA1 and PSD-95/GluA1 positive puncta per field. **F-G.** Quantification  
906 of PSD-95 and GluA1 puncta mean area (**F**) and intensity (**G**). Representative confocal  
907 images of a double immunofluorescence of PSD-95 and AMPAR subunit GluA1 in the motor  
908 cortex layer 5. *Scale bar*, 100  $\mu$ m. All values appear as mean  $\pm$  SEM and were analyzed  
909 with two-tailed Student's t-test *versus* WT \*  $P < 0.05$  and \*\* $P < 0.01$ .

910

911 **Figure 8. RTP801 KO mice show improved motor learning skills accompanied by**  
912 **functional and structural differences at a synaptic level.** In comparison to WT mice,  
913 RTP801 KO mice show decreased spine density in M1 LV neurons together with an  
914 increase in the proportion of filopodia and mushroom-like dendritic spines. At a structural  
915 level, we found increased post-synaptic areas and PSD size and increased presence of  
916 mitochondria at the synapse in KO primary motor cortex LV together with increased levels of  
917 synaptic GluA1 AMPAR subunit.

918

#### 919 **SUPPLEMENTARY FIGURE LEGENDS:**

920

921 **Supplementary figure 1. RTP801 is present in the postsynaptic compartment and its**  
922 **overexpression alters synaptic transmission and the levels of synaptic proteins in**  
923 **primary cultured hippocampal neurons. A. RTP801 protein colocalizes with**  
924 **postsynaptic marker PSD-95.** Cells were fixed at DIV 21 and endogenous RTP801 (green)  
925 and PSD-95 (red) were analyzed by immunofluorescence. White arrows designate PSD-95  
926 and RTP801 colocalizations. *Scale bar*, 5  $\mu$ m. **B. RTP801 seldom colocalizes with**

927 **presynaptic protein SV2A.** Cells were fixed at DIV 17 and RTP801 (green) and SV2A (red)  
928 proteins were analyzed by immunofluorescence. White arrows point SV2A positive  
929 presynaptic *puncta*, which does not colocalize with RTP801. *Scale bar*, 5  $\mu$ m. **C, D. Ectopic**  
930 **RTP801 reduces the intensity of PSD-95 and GluA1 at the synaptic contacts.** Neurons  
931 were transfected with a vector expressing RTP801 tagged with eGFP (eGFP-RTP801) or  
932 with an eGFP control vector (eGFP). Two days following transfection, at DIV 15, neurons  
933 were fixed and subjected to immunofluorescent staining against eGFP (green) and PSD-95  
934 (**C**) or GluA1 (**D**) (both in red). Images show a representative staining for each protein.  
935 Graphs show immunofluorescent integrated intensity and synaptic accumulation density,  
936 represented as mean  $\pm$  SEM from the analysis of at least 12 neurons per group. Data in c  
937 was analyzed with two-tailed Student's t-test. Data in d was analyzed with Mann-Whitney  
938 test. \*  $P < 0.05$ , \*\*  $P < 0.01$  vs. eGFP. *Scale bar*, 10  $\mu$ m. **F. Ectopic RTP801 attenuates**  
939 **postsynaptic excitatory transmission.** Primary cultures of hippocampal neurons from rat  
940 E.18 embryos were transfected at DIV 13 with a control vector (eGFP) or a vector  
941 expressing RTP801 protein fused with GFP (eGFP-RTP801). Two days later mEPSC were  
942 recorded through patch-clamp. Quantitative analysis of mEPSCs amplitude and frequency is  
943 represented in the graphics as mean  $\pm$  SEM from the recordings performed in at least 8  
944 transfected neurons per condition. Data was analyzed with Student's t-test, \*  $P < 0.01$  vs.  
945 eGFP.

946

947 **Supplementary figure 2. Multielectrode array analysis of M1 LV spontaneous activity**  
948 **on mouse slices. A.** We found no sex effects in the spike rate differences between WT and  
949 RTP801 KO animals (Two-way ANOVA;  $F_{(1,11)} = 5.137$ ;  $P = 0.045$ ;  $F_{(1,11)} = 0.374$ ; for the  
950 genotype effect;  $P = 0.553$  for the sex effect,  $F_{(1,11)} = 1.627$ ,  $P = 0.228$  for the sex/genotype  
951 interaction). When we analyzed the spike-train patterns in WT and KO motor cortex slices  
952 we found no differences in mean burst duration (**B**), inter-spike interval duration (ISI) inside  
953 the bursts (**C**), and spike frequency in the burst (**D**).

954

955 **Supplementary figure 3. A. RTP801 KO mice show hindlimb clasping.** Example of  
956 clasping reflex; 2-months-old RTP801 KO mice display their hindlimbs towards their  
957 abdomen when suspended by the tail. Graphical representation of clasping phenotype  
958 scored: 0 (no clasping), 1 (one hindlimb is retracted), 2 (both hindlimbs are partially  
959 retracted) and 3 (both hindlimbs totally retracted towards the abdomen). Measures are  
960 represented as mean  $\pm$  SEM and analyzed with two-way ANOVA (genotype effect, \*\*\*  $P <$   
961 0.001) followed by Bonferroni's multiple comparisons test for *post hoc* analyses, \*\*\*  $P <$   
962 0.001. **B. Gait abnormalities are found in both male and female RTP801 KO mice.**  
963 Graphics show hindlimb lengths for stride, sway, stance and limbs overlap. Data is  
964 represented as mean  $\pm$  SEM and was analyzed with two-way ANOVA followed by  
965 Bonferroni's multiple comparisons test for *post hoc* analyses. \*  $P <$  0.05, \*\*  $P <$  0.01, \*\*\*  $P <$   
966 0.001 *versus* same-gender WT group, N = 8 WT males, 5 WT females, 4 KO males and 8  
967 KO females. **C. Anxiety-like behavior analyses during open field test.** The assessment  
968 was performed for 10 minutes. Graphs show measures of self-grooming behavior, number of  
969 wall and vertical rearings and number of fecal pellets. Data is represented as mean  $\pm$  SEM  
970 and was analyzed with two-way ANOVA followed by Bonferroni's multiple comparisons test  
971 for *post hoc* analyses. \*\*\*  $P <$  0.001 *versus* same-gender WT group .N = 8 WT males, 5 WT  
972 females, 4 KO males and 8 KO females. **D. Both male and female RTP801 KO mice**  
973 **display the same tendency to perform better in the Accelerating Rotarod.** Time spent in  
974 the accelerating rotarod for three days, four trials per day, by RTP801 KO female and male  
975 mice. Data is represented as mean  $\pm$  SEM and was analyzed with two-way ANOVA. N = 14  
976 WT males + 17 WT females and 12 KO males + 18 KO females.

977

978 **Supplementary figure 4. Percentage of different types of spine morphology measured**  
979 **in apical and basal dendrites.** Graphs show the percentage of each morphological type of  
980 dendritic spines versus total number of spines. Measures are represented as mean  $\pm$  SEM

981 50 dendrites per genotype (5 animals per genotype, 5 basal and 5 apical dendrites per  
982 animal). Data was analyzed with two-tailed Student's t-test, \*  $P < 0.05$ .

983

984 **Supplementary figure 5. A-B.** There are no differences in the number of presynapses and  
985 postsynapses with more than one contact between WT and KO animals. Electron  
986 micrographs illustrate a presynapse (**A**) with two postsynaptic contacts and a postsynapse  
987 (**B**) with two presynaptic inputs. **C.** There are no differences in the percentage of  
988 postsynaptic compartments with spine apparatus (S. App) between genotypes. Image on the  
989 right show a perforated contact with a spine apparatus in the postsynapse. Data is  
990 represented as mean percentage  $\pm$  SEM. All histograms represent data from 45-50 images  
991 per animal, four animals per genotype. Data was analyzed with Student's t-test.

992

993

## FIGURE 1

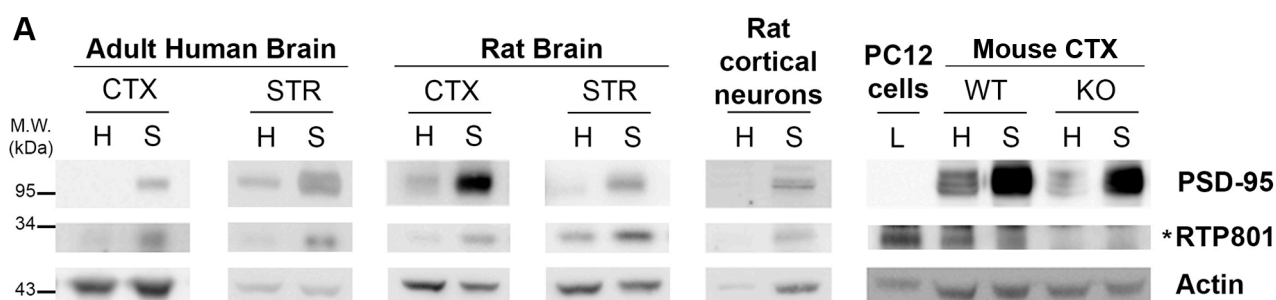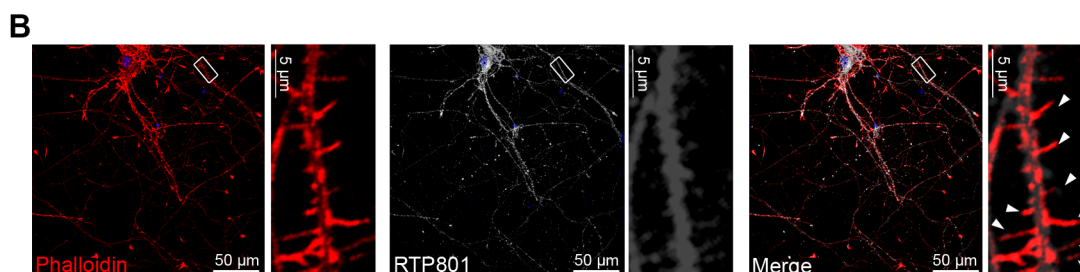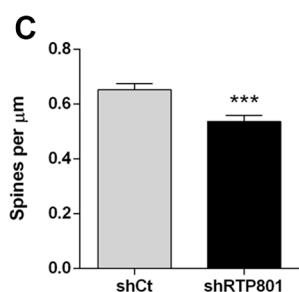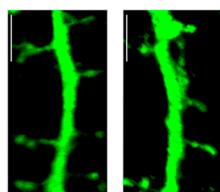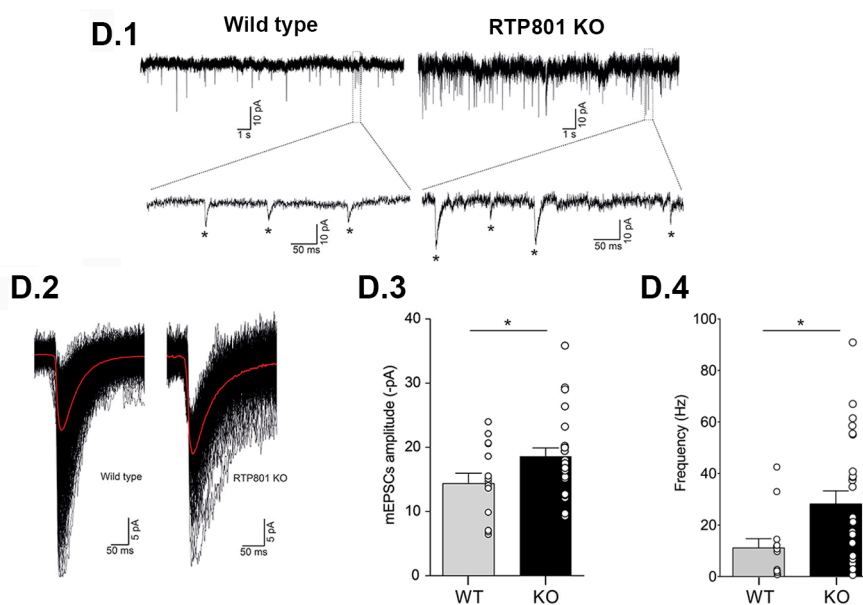

## FIGURE 2

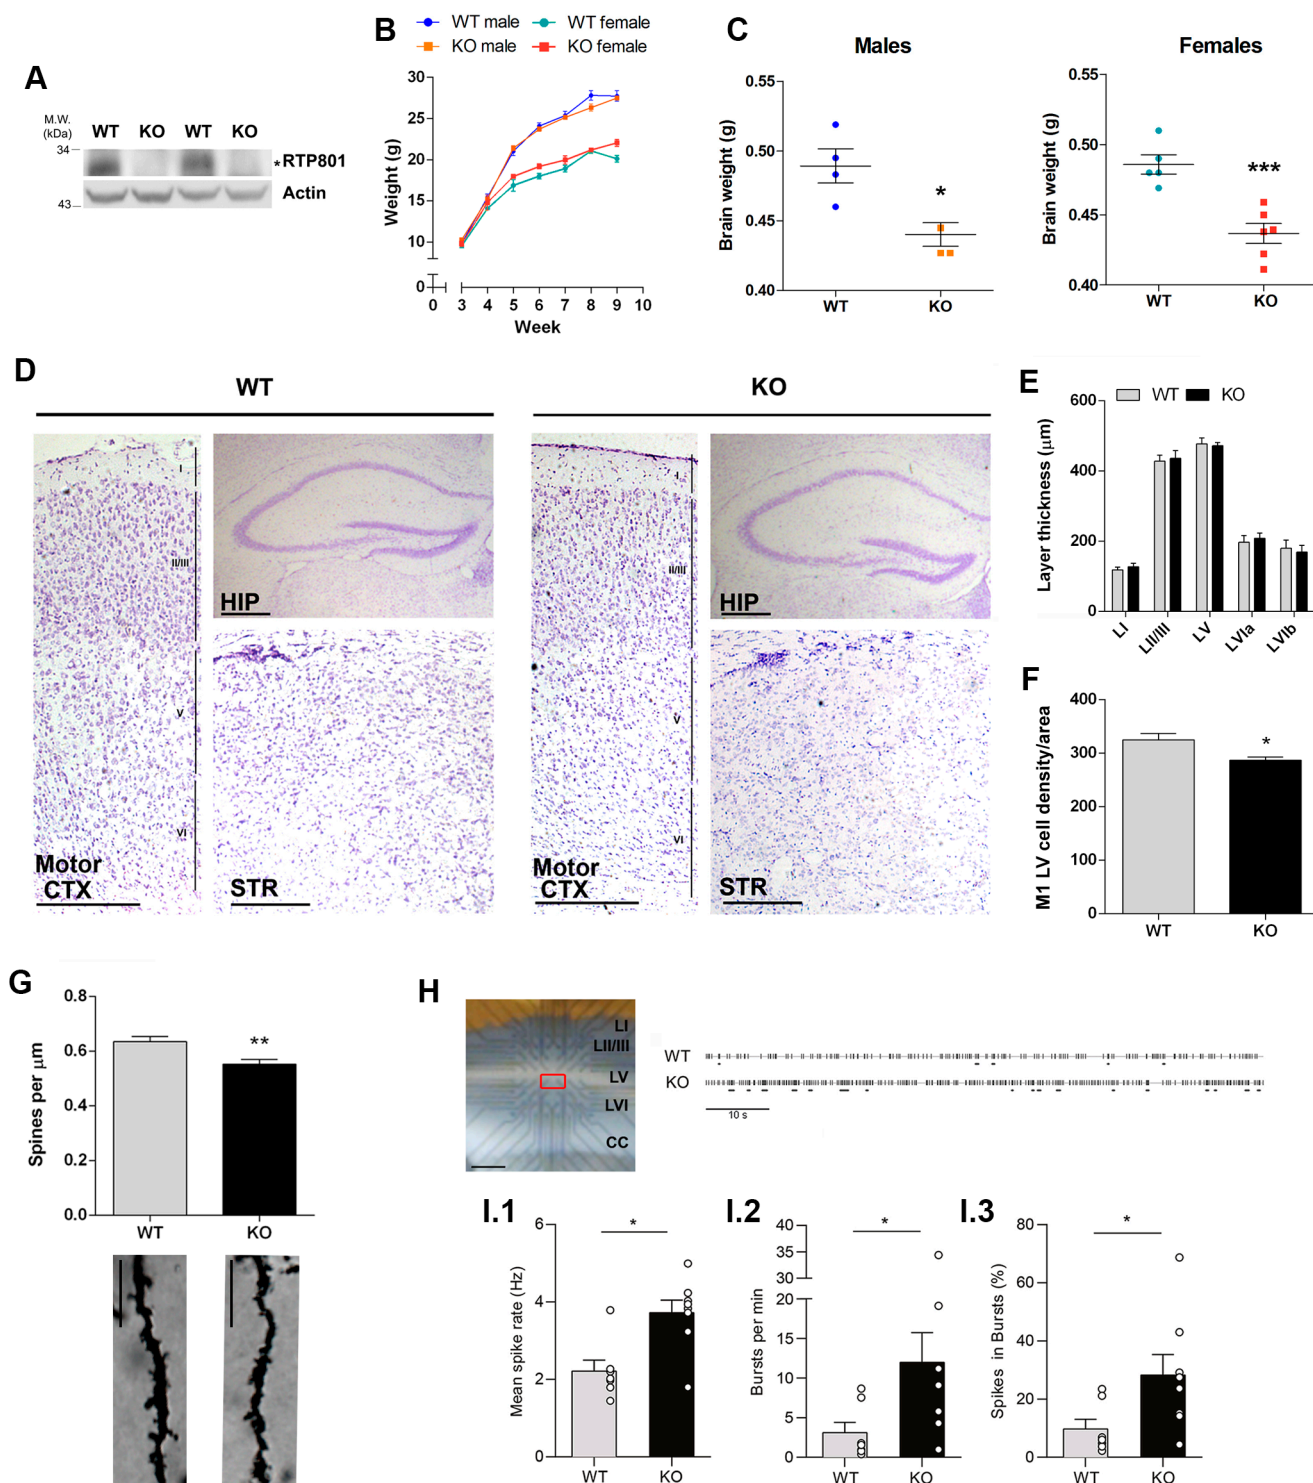

**FIGURE 3**

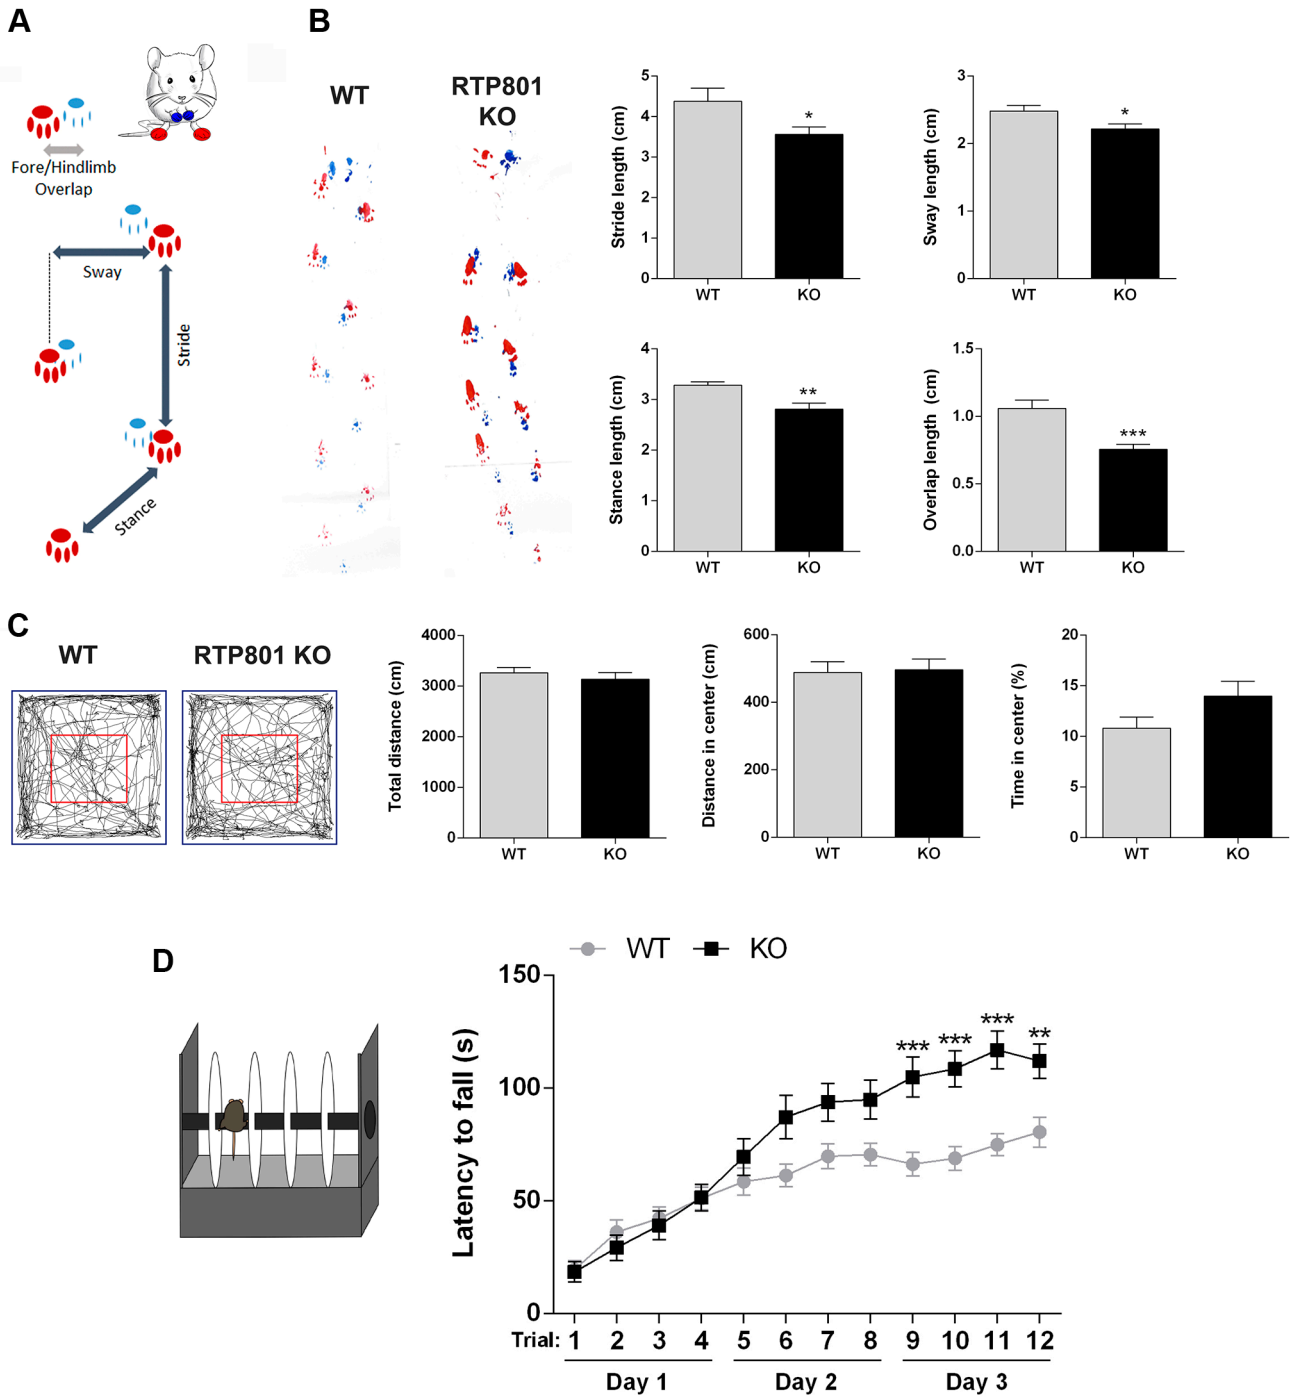

FIGURE 4

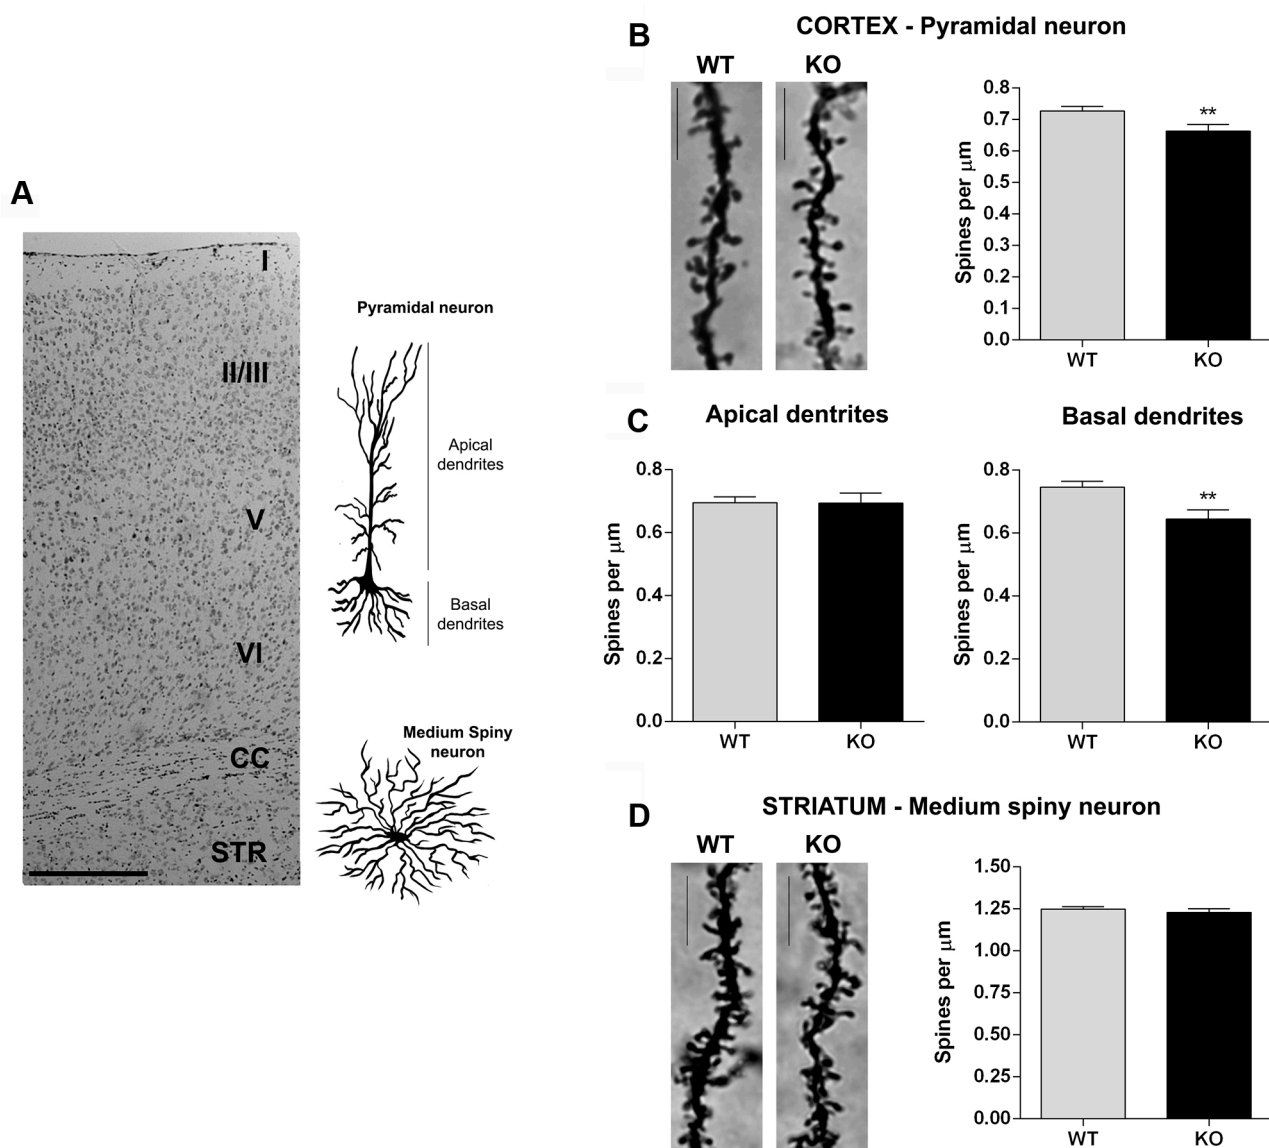



**FIGURE 5**

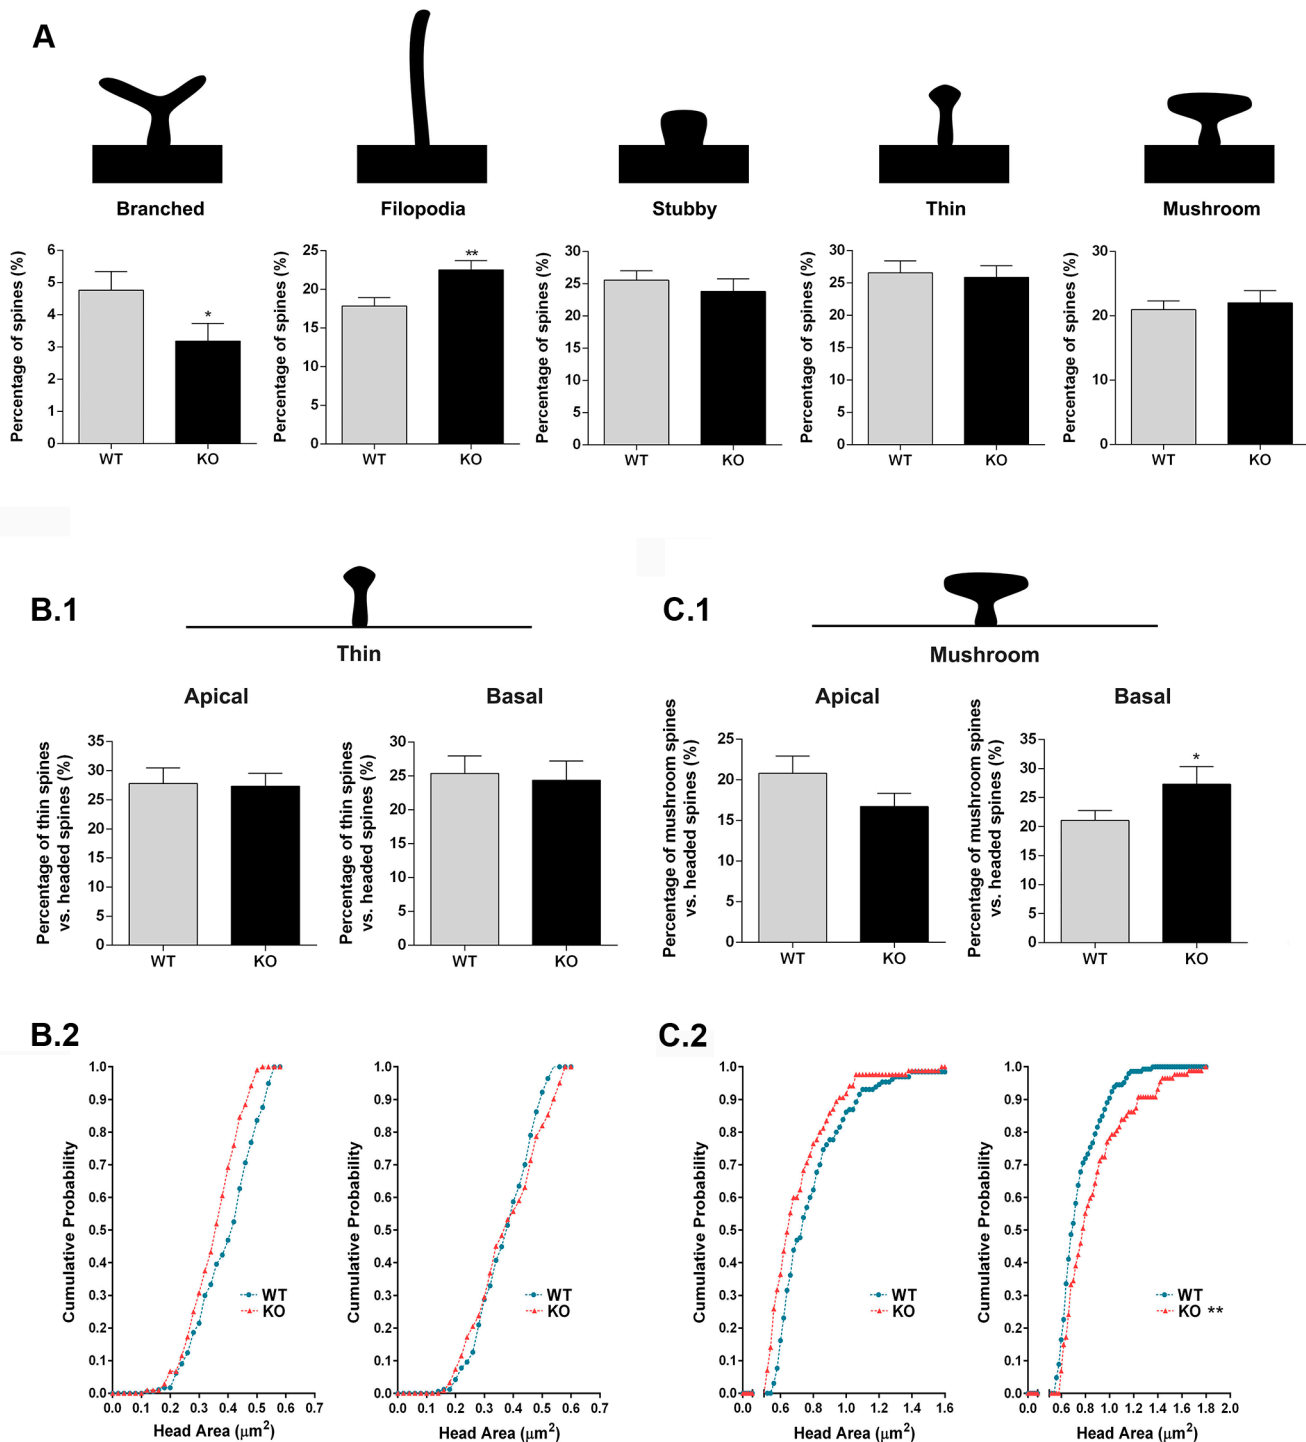

**FIGURE 6**

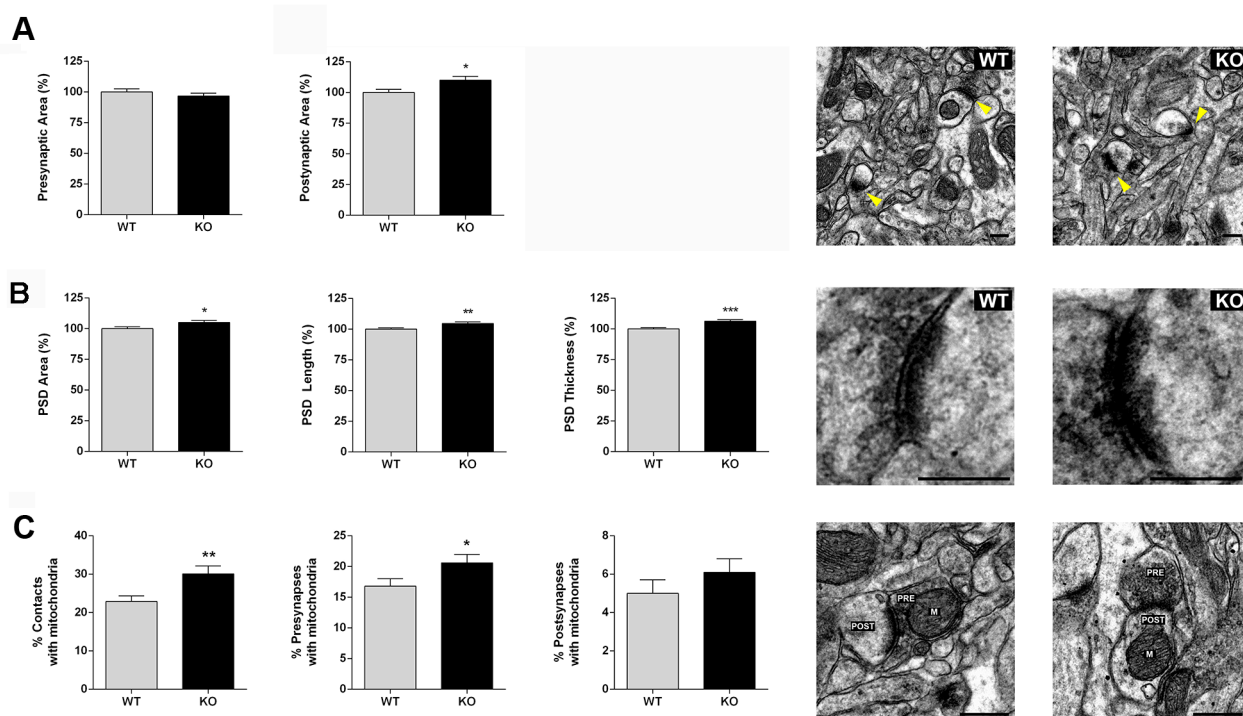

## FIGURE 7

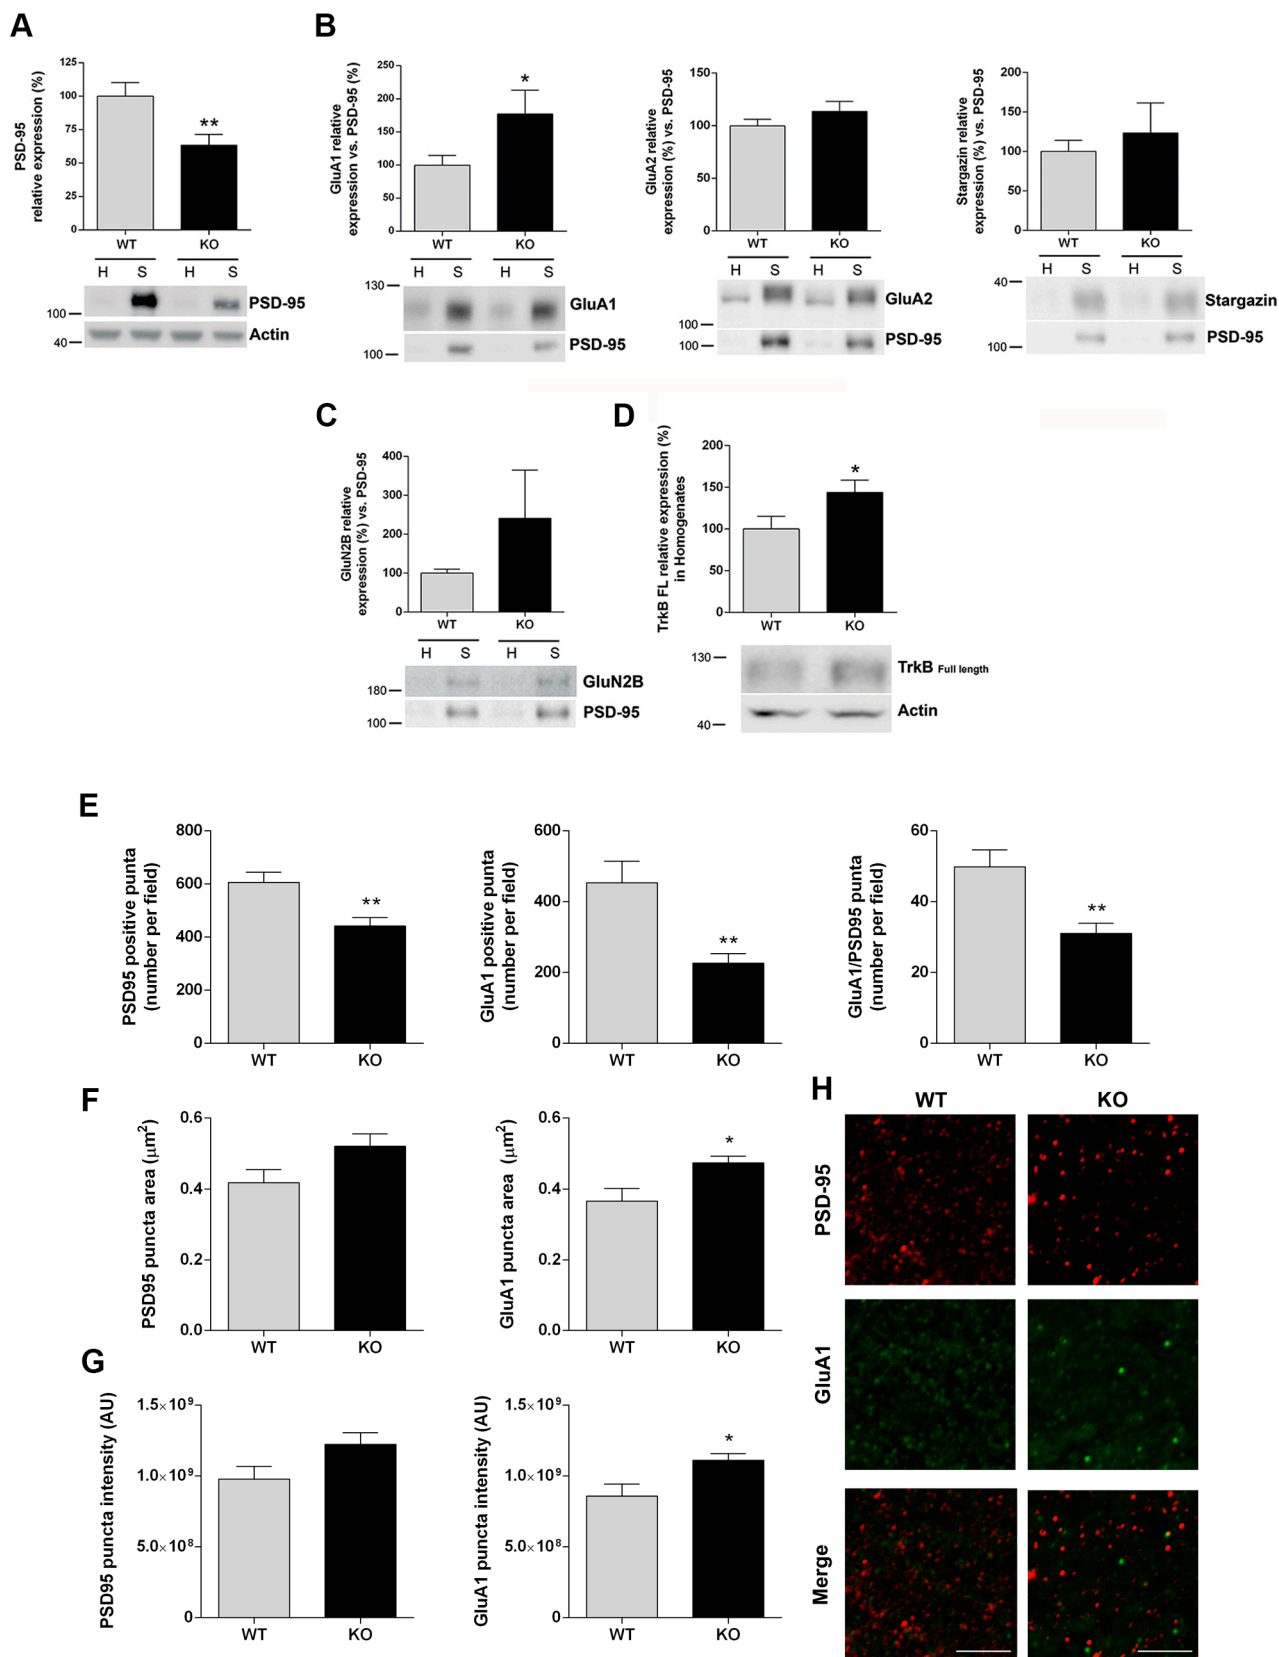

Motor CTX  
pyramidal neuron

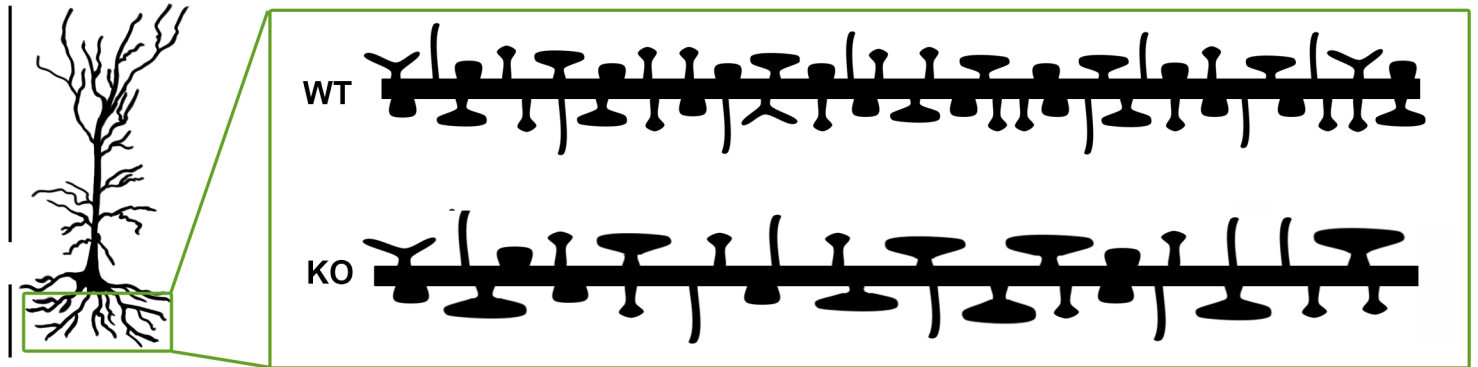

WT SYNAPSE

RTP801 KO SYNAPSE

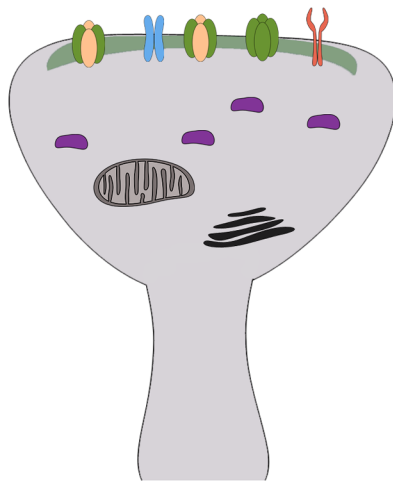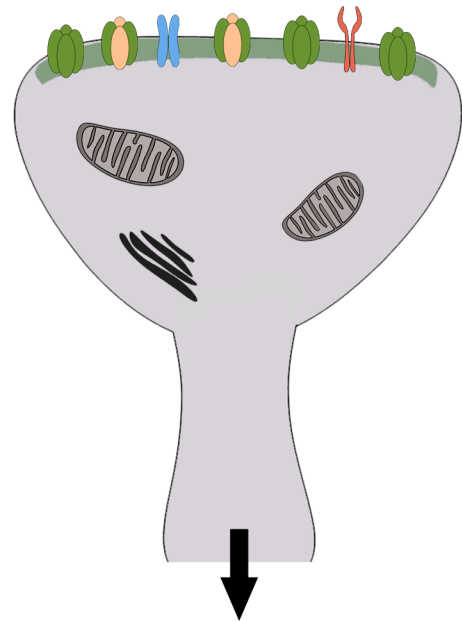

ndria

paratus

(GluA2-containing, CI)

(GluA1-containing, CP)

Improved motor learning skills  
Increased amplitude and frequency of excitatory current
